# Supplementary material for: Comparative genomics of chytrid fungi reveal insights into the obligate biotrophic and pathogenic lifestyle of Synchytrium endobioticum
Source: PubMed Central journal article supplement (PMC6572847; doi:10.1038/s41598-019-45128-9), 2019-06-17

Supplementary file with: 7 ca dUfUHj Y[ Ybca ]Vg'cZW ntf]X'Z b[ ]'fY] YU']bg][ \ lg']bhc'k Y'cV'] UHY' V]cfc d\ ]WUbX'dUH c[ Yb]W]Z'ghmY'cZGnbW ntf]i a 'YbXcV]c]W a

Bart T.L.H. van de Vossenberg & Sven Warris, Hai D.T. Nguyen, Marga P.E. van Gent-Pelzer, David L. Joly, Henri C. van de Geest, Peter J.M. Bonants, Donna S. Smith, C. André Lévesque, Theo A.J. van der Lee

Supplementary file 3: KEGG pathway analysis

# *Chytridiomycota versus Ascomycota and Basidiomycota*

The following color codes are used:

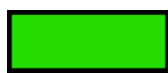

Present in  $\geq 1$  in all groups: Obligate biotrophic chytrid (Obl\_Chyt), Culturable chytrid (Cult\_Chyt), Culturable control species (Cult\_CTRL), and Obligate or facultative biotrophic Control species (Obl\_CTRL)

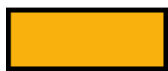

Absent in both Obl\_Chyt and all Obl\_CTRL, but present both in  $\geq 1$  Cult\_Chyt and  $\geq 1$  Cult\_CTRL

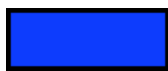

Present in  $\geq 1$  Obl\_Chyt and  $\geq 1$  Obl\_CTRL, but absent in all Cult\_Chyt and Cult\_CTRL

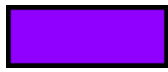

Present in  $\geq 1$  in all groups except Obl\_Chyt

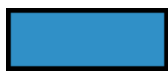

Present in  $\geq 1$  Obl\_Chyt, but absent in all other groups (Cult\_Chyt, Cult\_CTRL, Obl\_CTRL)

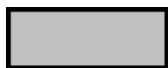

Present in  $\geq 1$  in any specimen included, but not following the grouping as described above

Numerical values in colored boxed {a, b, c, d} represent the number of Obl\_Chyt strains (a, max = 2), Cult\_Chyt strains (b, max = 9), Cult\_CTRL strains (c, max = 3) and Obl\_CTRL strains (d, max = 3) for which a element was predicted by Interproscan.

## Species and strains included

**Obl\_Chyt:** *Synchytrium endobioticum* LEV6574  
*Synchytrium endobioticum* MB42

**Cult\_Chyt:** *Batrachochytrium dendrobatidis* JAM81  
*Batrachochytrium dendrobatidis* JEL423  
*Chytridium confervae* CBS 675.73  
*Gonapodya prolifera* JEL478  
*Homolaphlyctis polyrhiza* JEL142  
*Powellomyces hirtus* CBS 809.83  
*Spizellomyces palustris*(= *Phlyctochytrium palustre*) CBS 455.65  
*Spizellomyces punctatus* DAOM BR117  
*Synchytrium microbalum* JEL517

**Cult\_CTRL:** *Saccharomyces cerevisiae* (SCE)  
*Cryptococcus neoformans* (CNE)  
*Neurospora crassa* (NCR)

**Obl\_CTRL:** *Ustilago maydis* (UMA)  
*Melampsora larici-populina* (MLR)  
*Puccinia graminis* f.sp. *tritici* (PGR)



# 1. Carbohydrate metabolism

| MAP | PATHWAY                                     |
|-----|---------------------------------------------|
| 10  | Glycolysis / Gluconeogenesis                |
| 20  | Citrate cycle (TCA cycle)                   |
| 30  | Pentose phosphate pathway                   |
| 40  | Pentose and glucuronate interconversions    |
| 51  | Fructose and mannose metabolism             |
| 52  | Galactose metabolism                        |
| 53  | Ascorbate and aldarate metabolism           |
| 500 | Starch and sucrose metabolism               |
| 520 | Amino sugar and nucleotide sugar metabolism |
| 562 | Inositol phosphate metabolism               |
| 620 | Pyruvate metabolism                         |
| 630 | Glyoxylate and dicarboxylate metabolism     |
| 640 | Propanoate metabolism                       |
| 650 | Butanoate metabolism                        |
| 660 | C5-Branched dibasic acid metabolism         |

# GLYCOLYSIS / GLUCONEOGENESIS

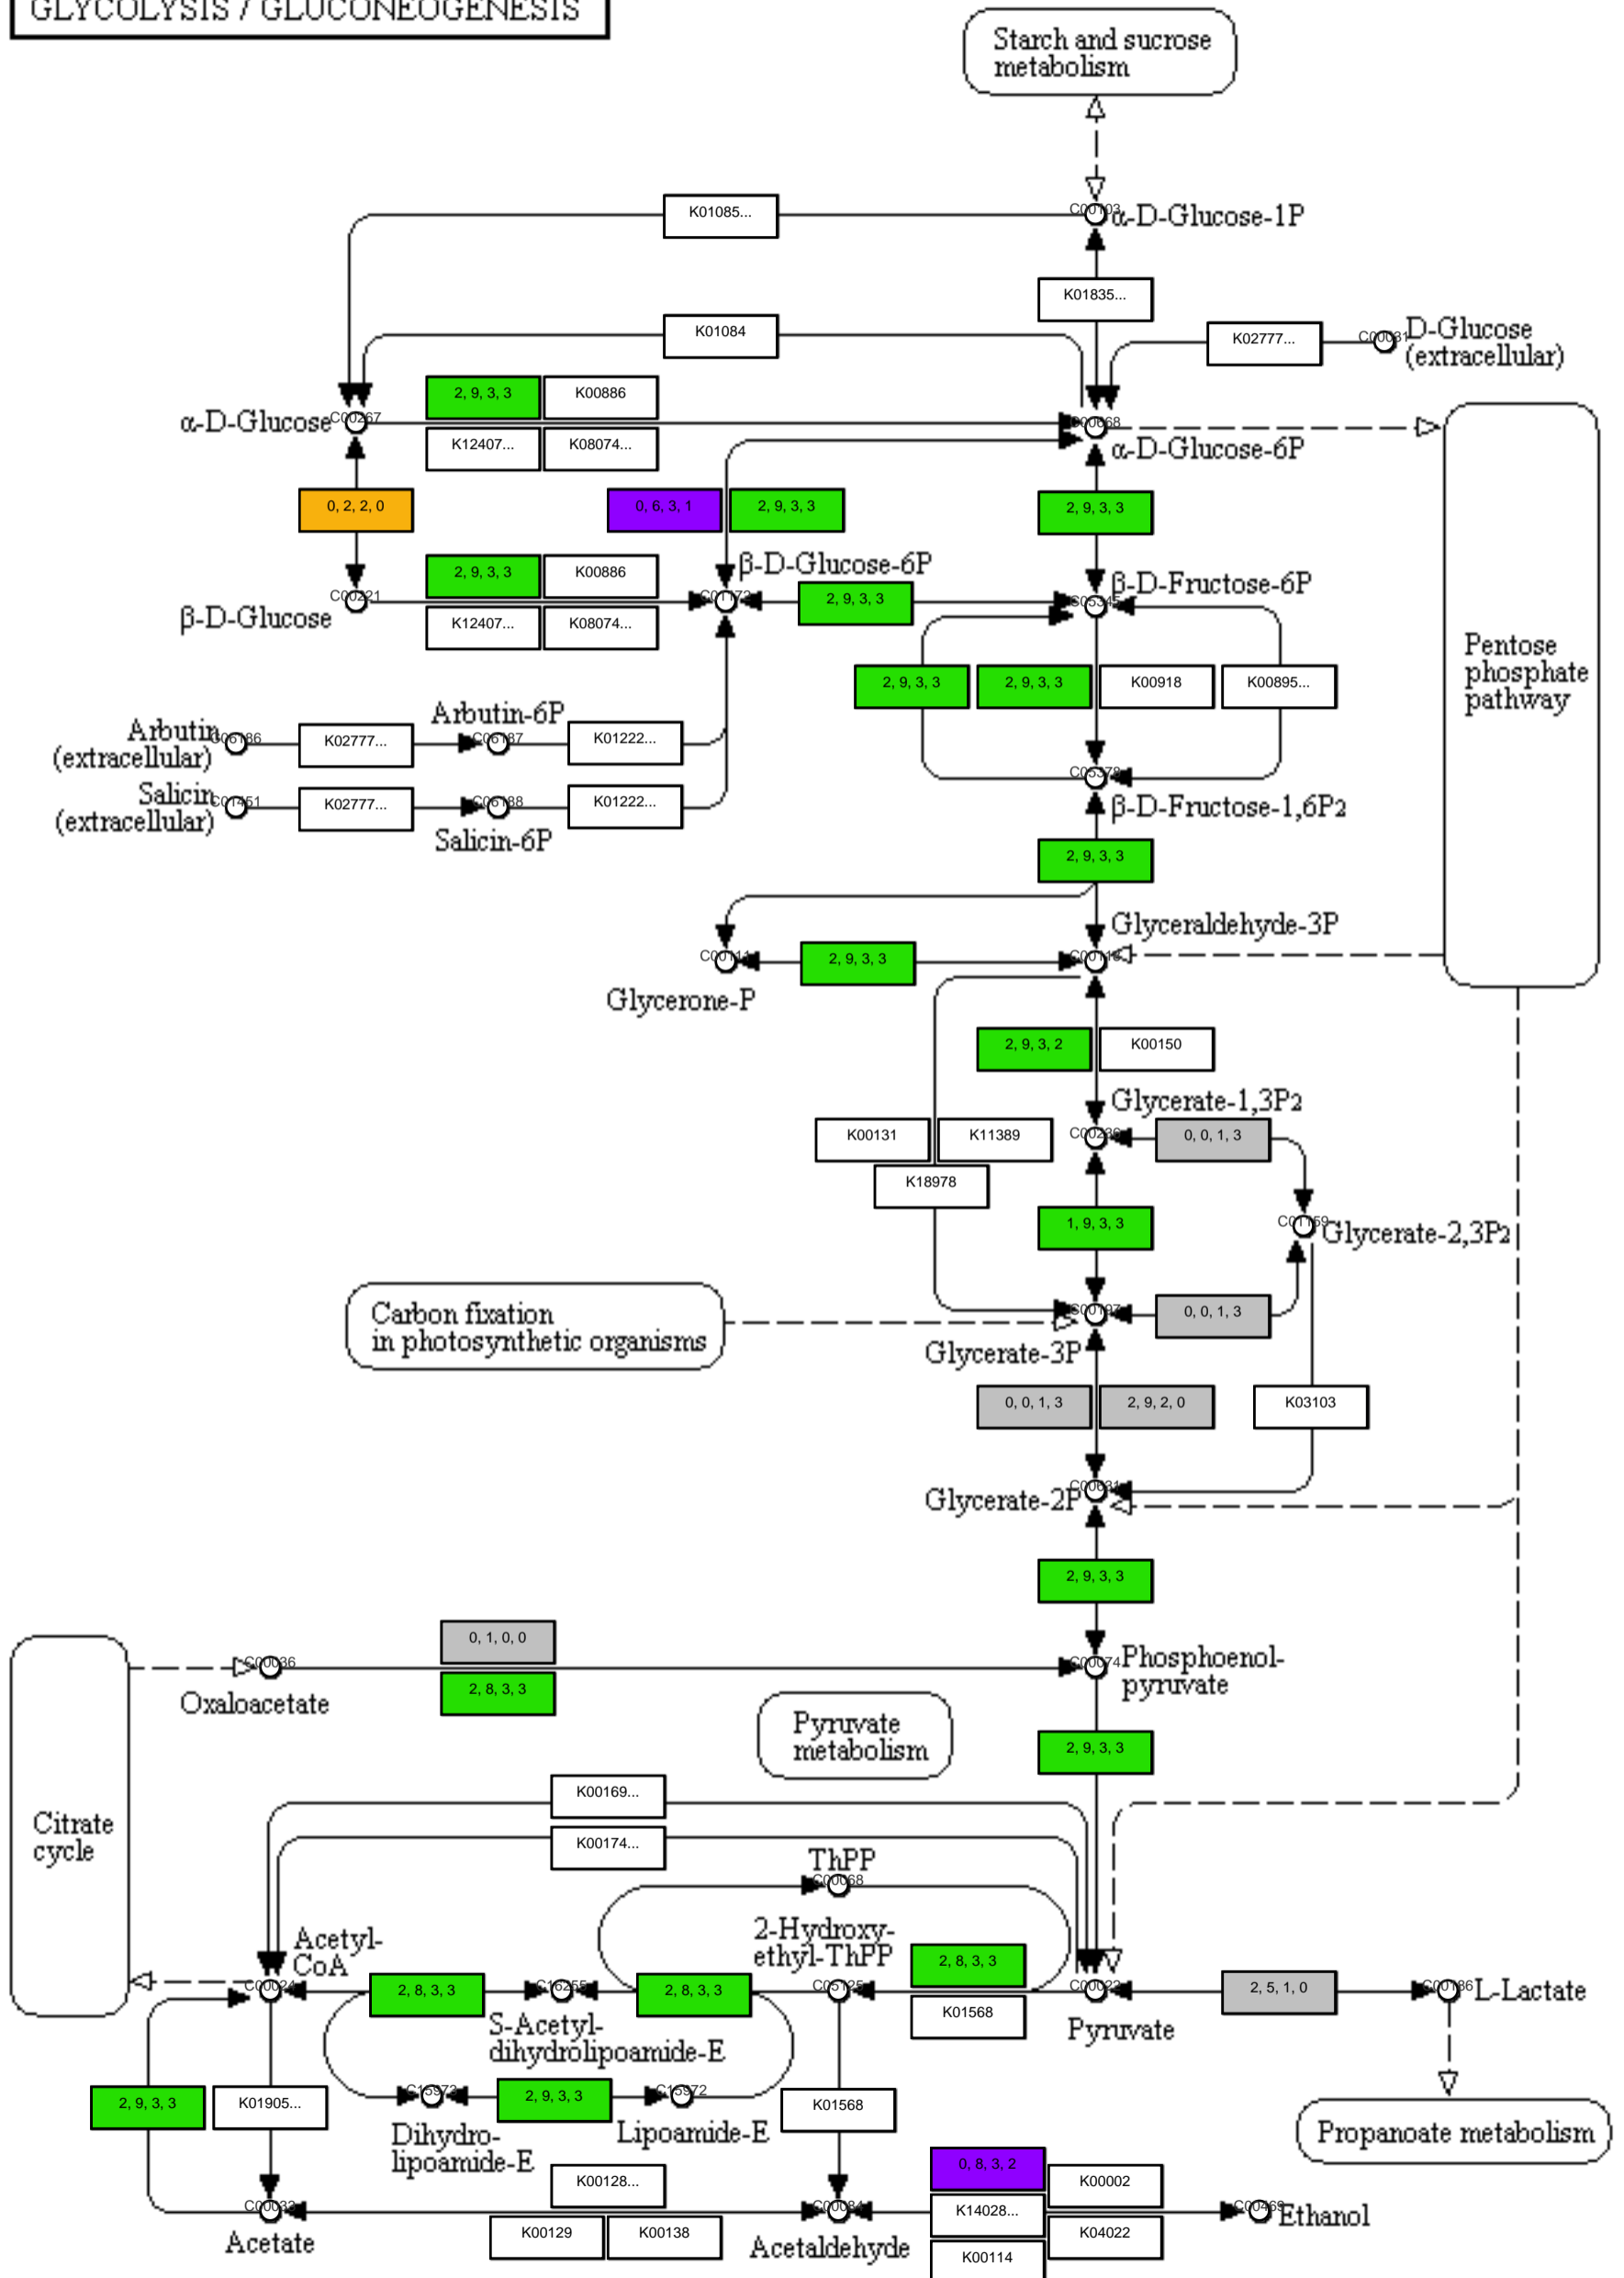

# CITRATE CYCLE (TCA CYCLE)

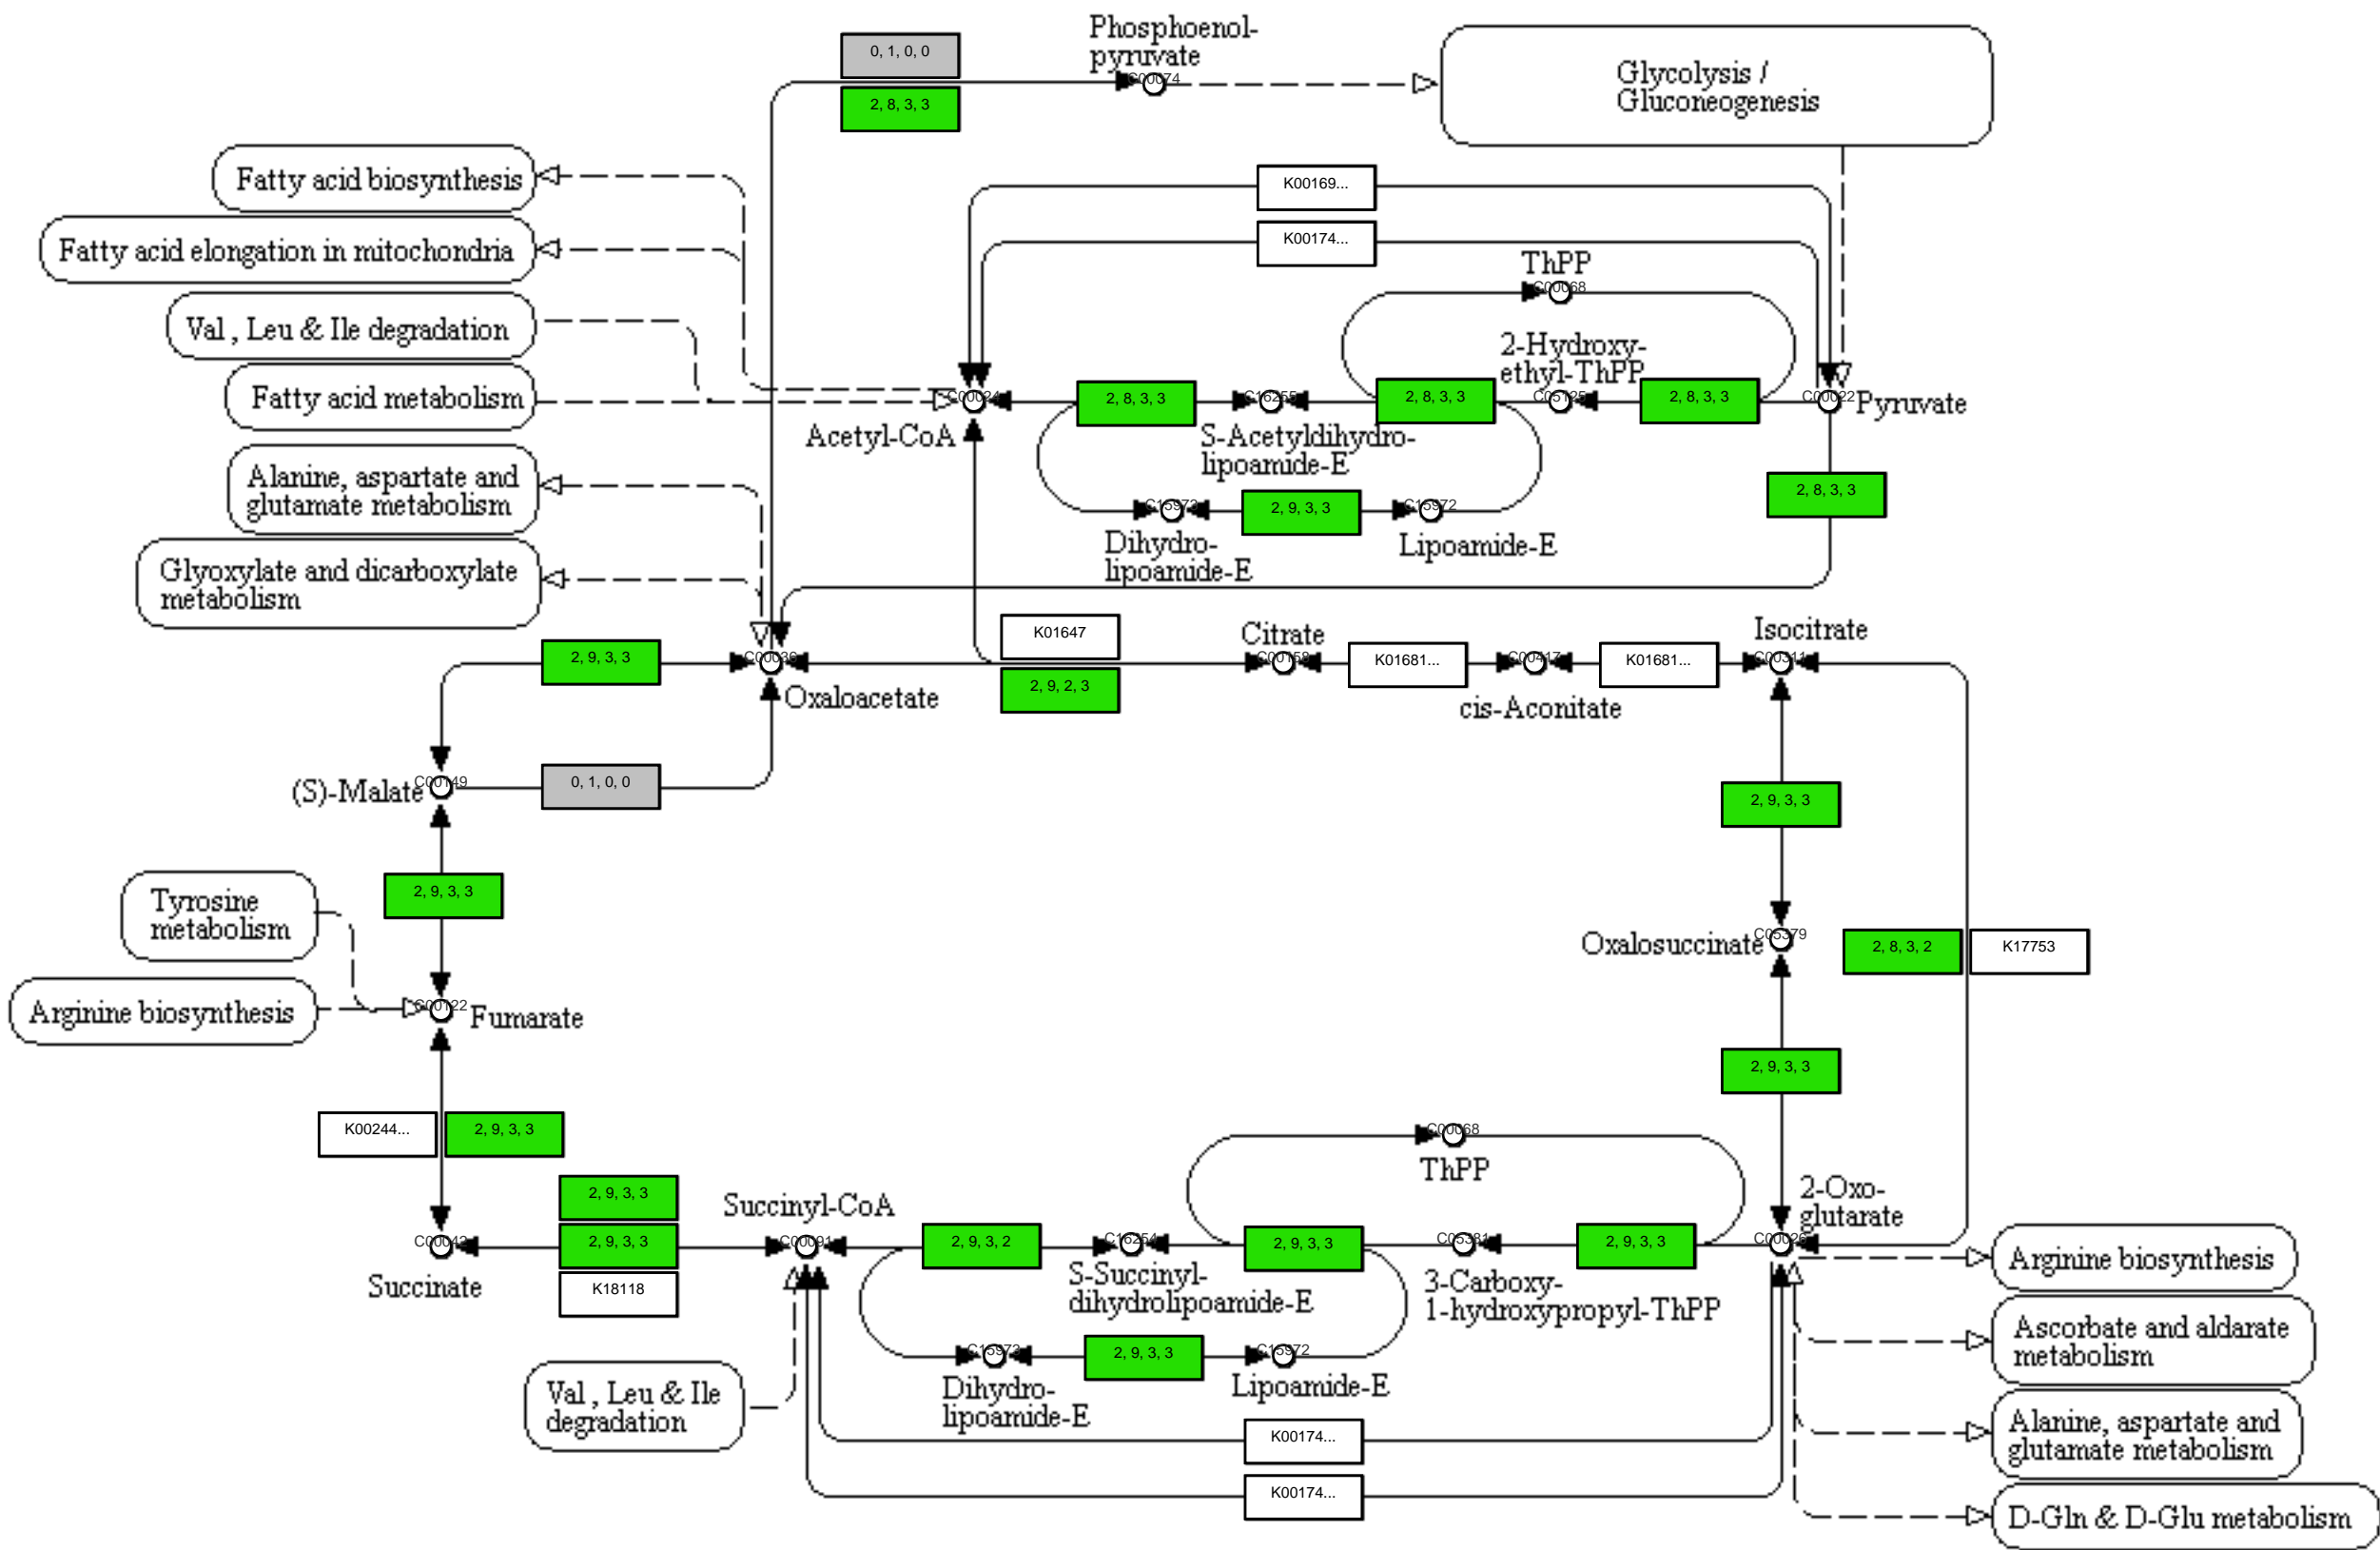















AMINO SUGAR AND NUCLEOTIDE SUGAR METABOLISM

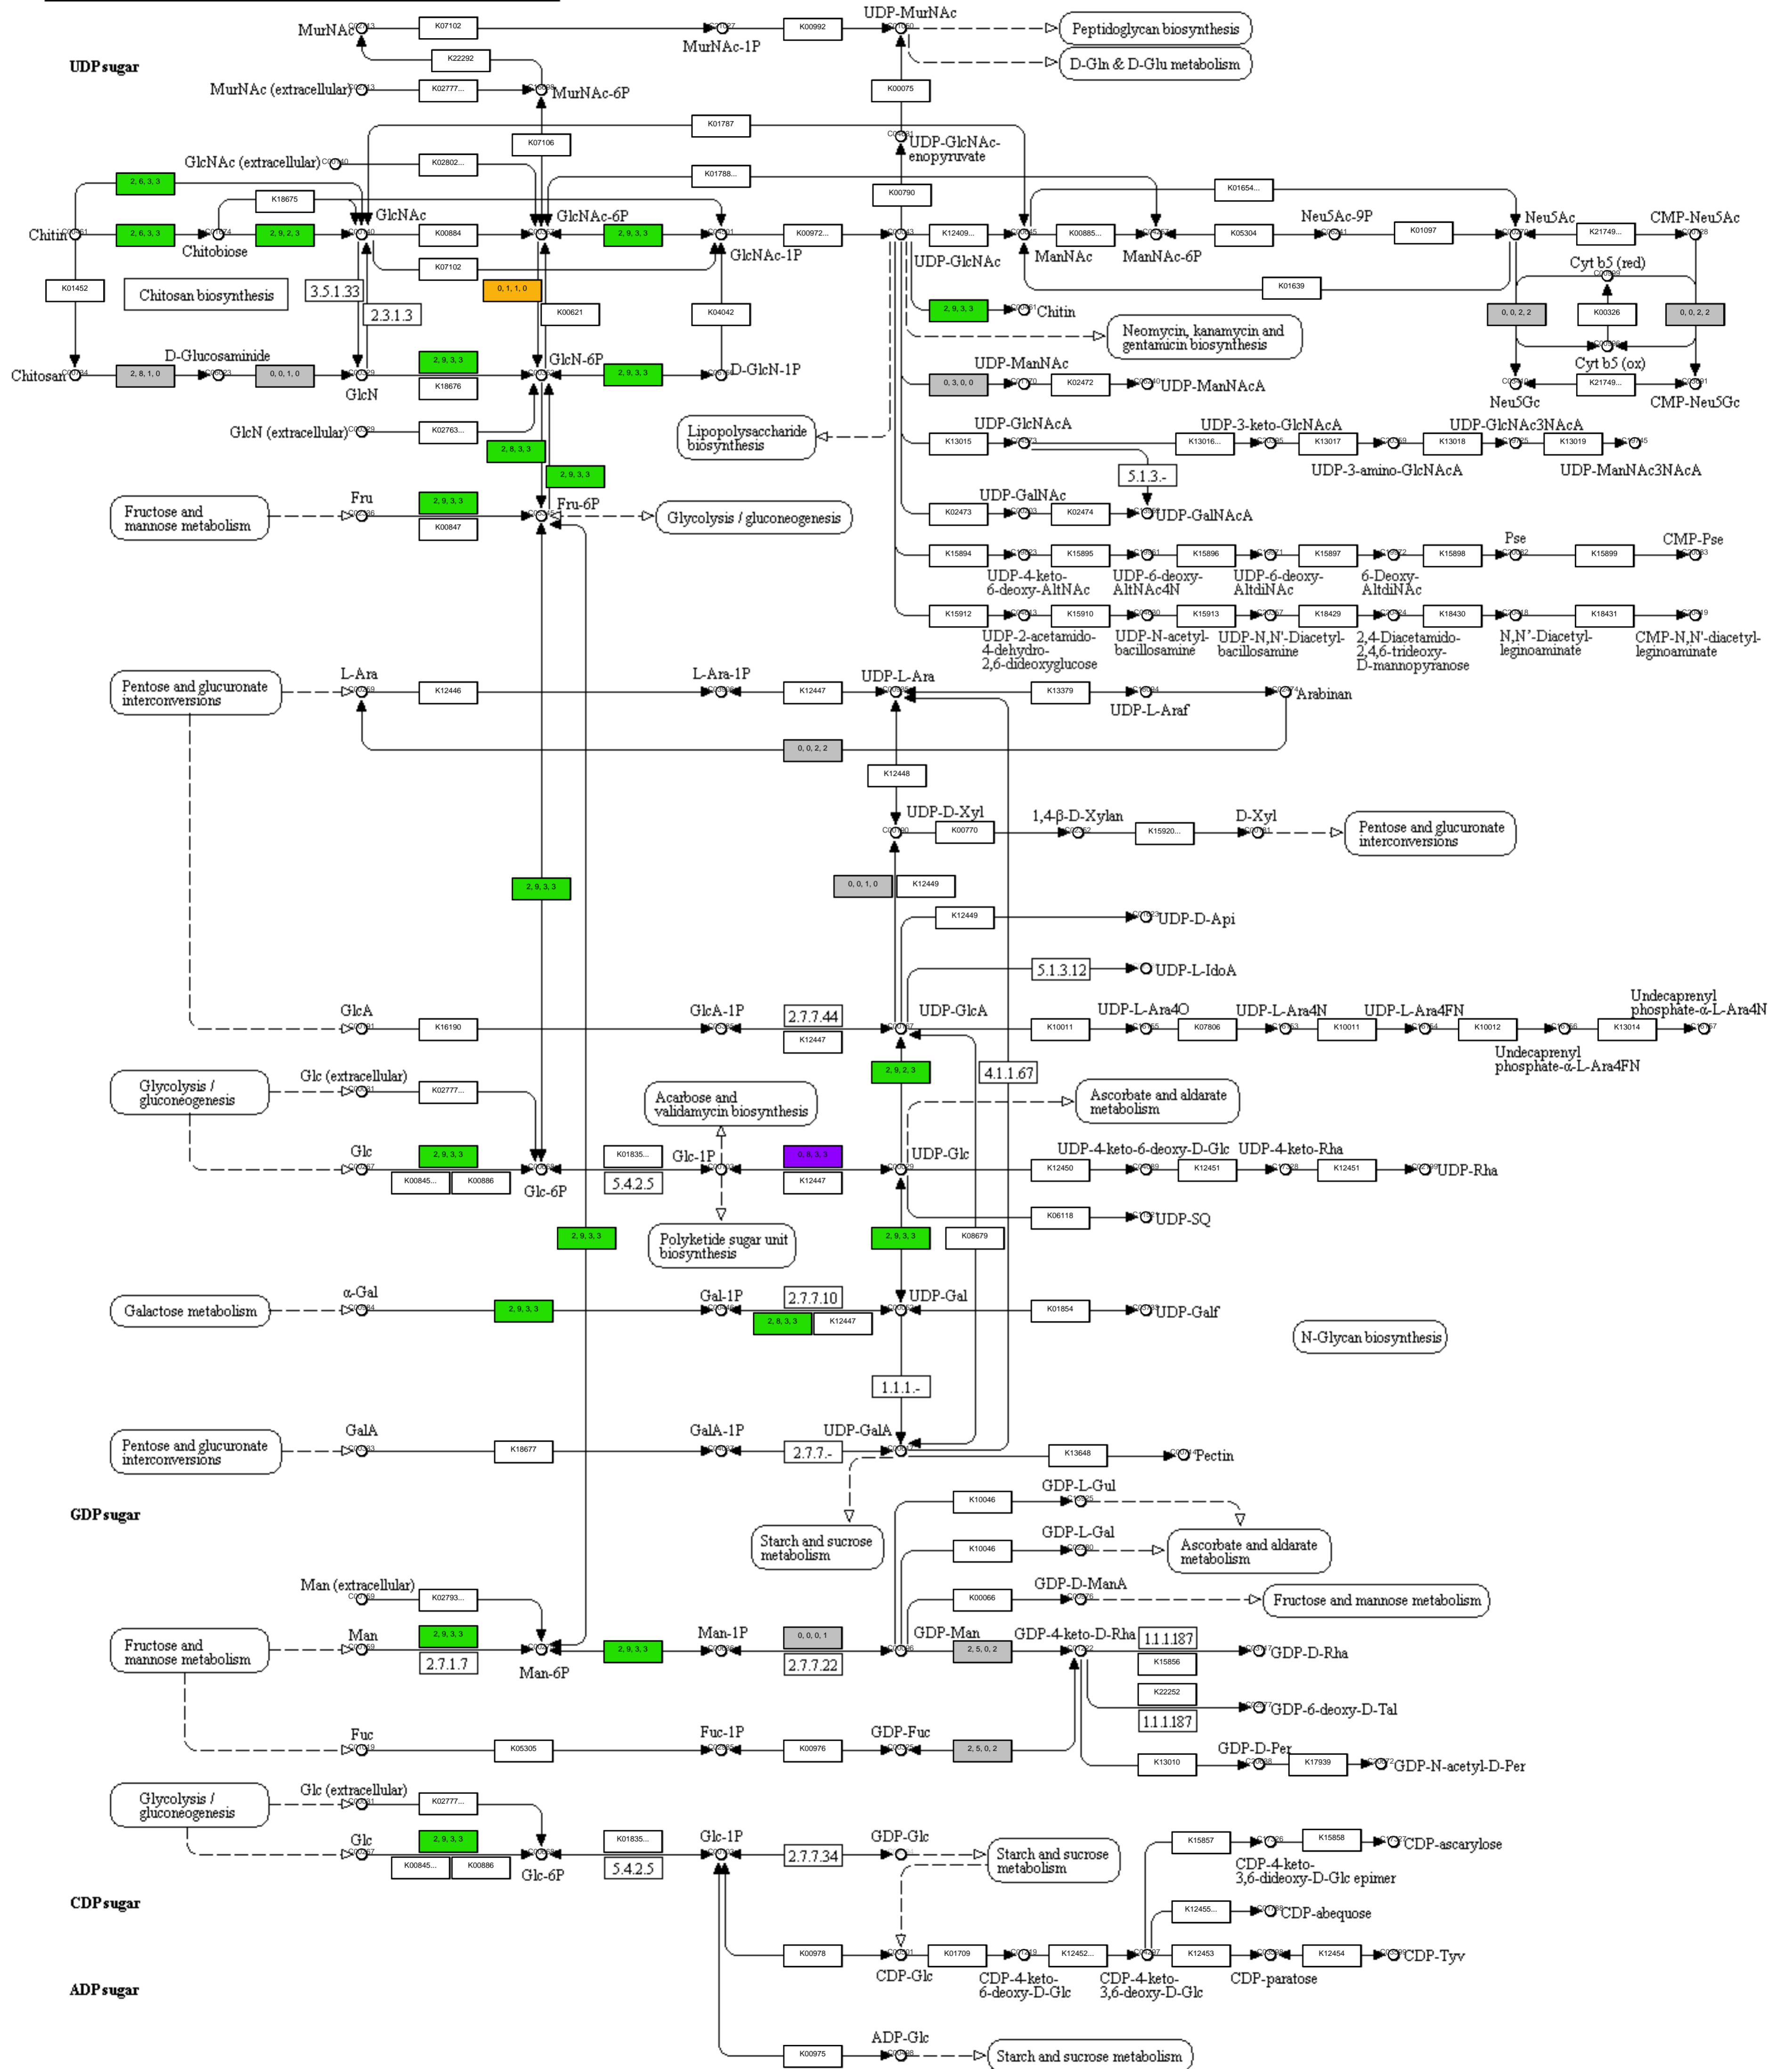



# INOSITOL PHOSPHATE METABOLISM

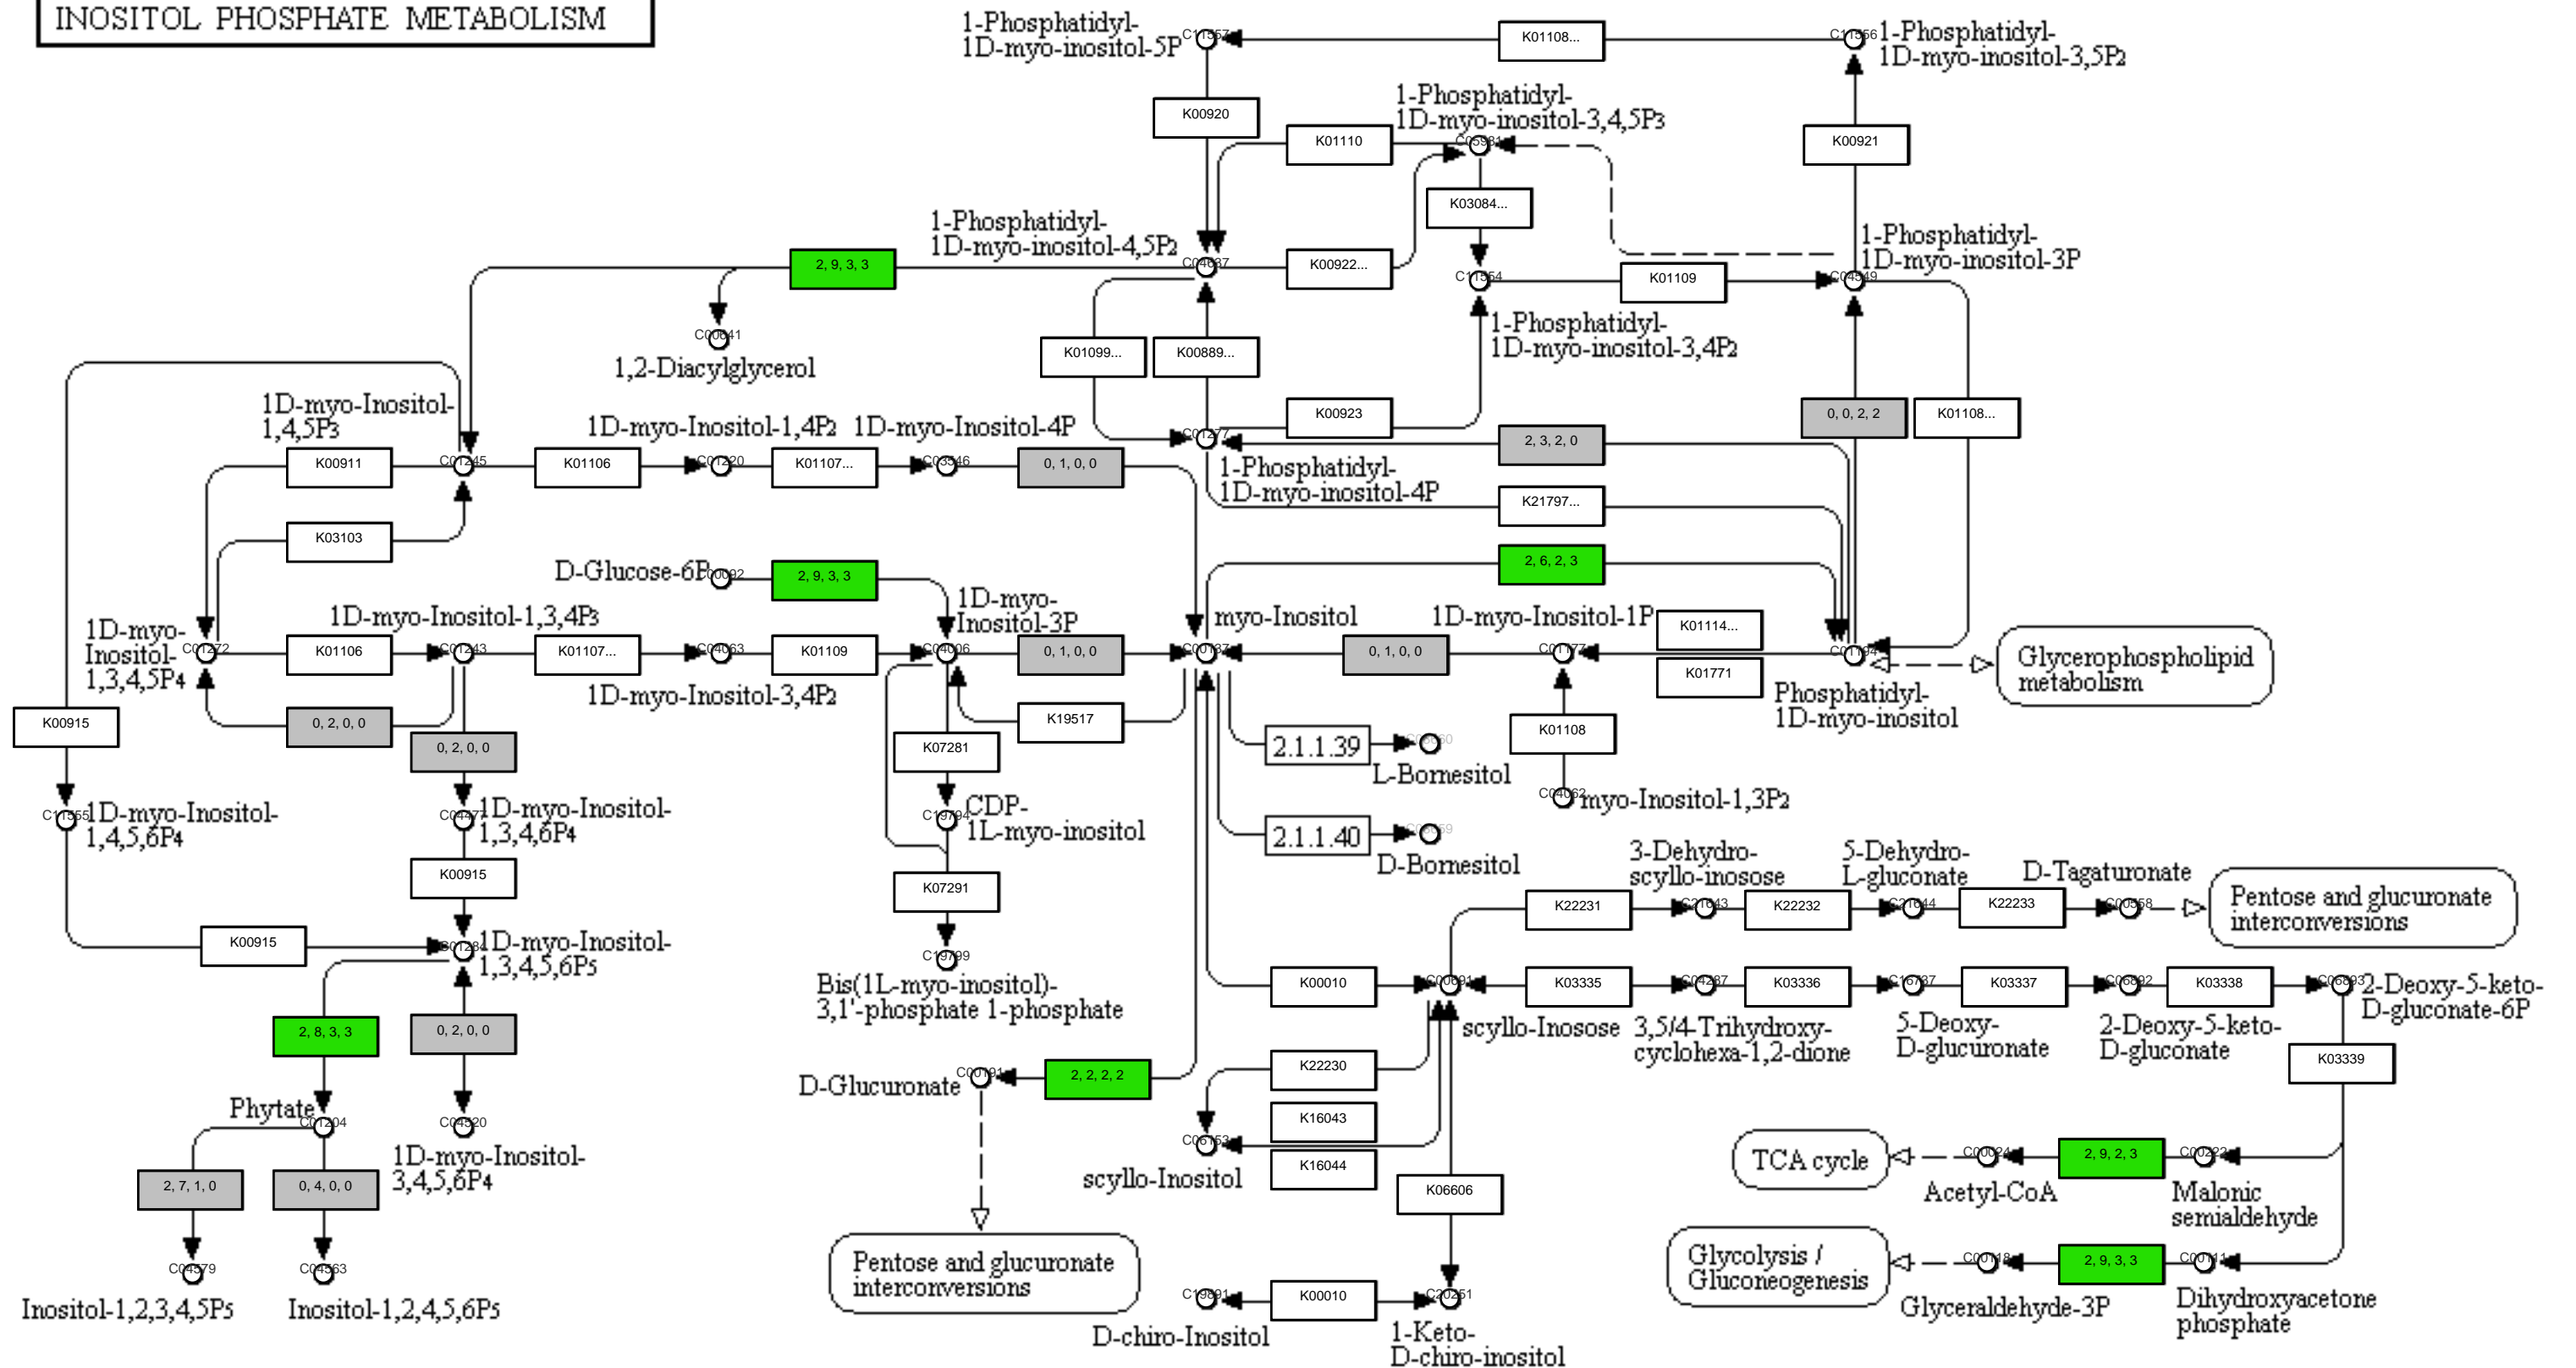



GLYOXYLATE AND DICARBOXYLATE METABOLISM

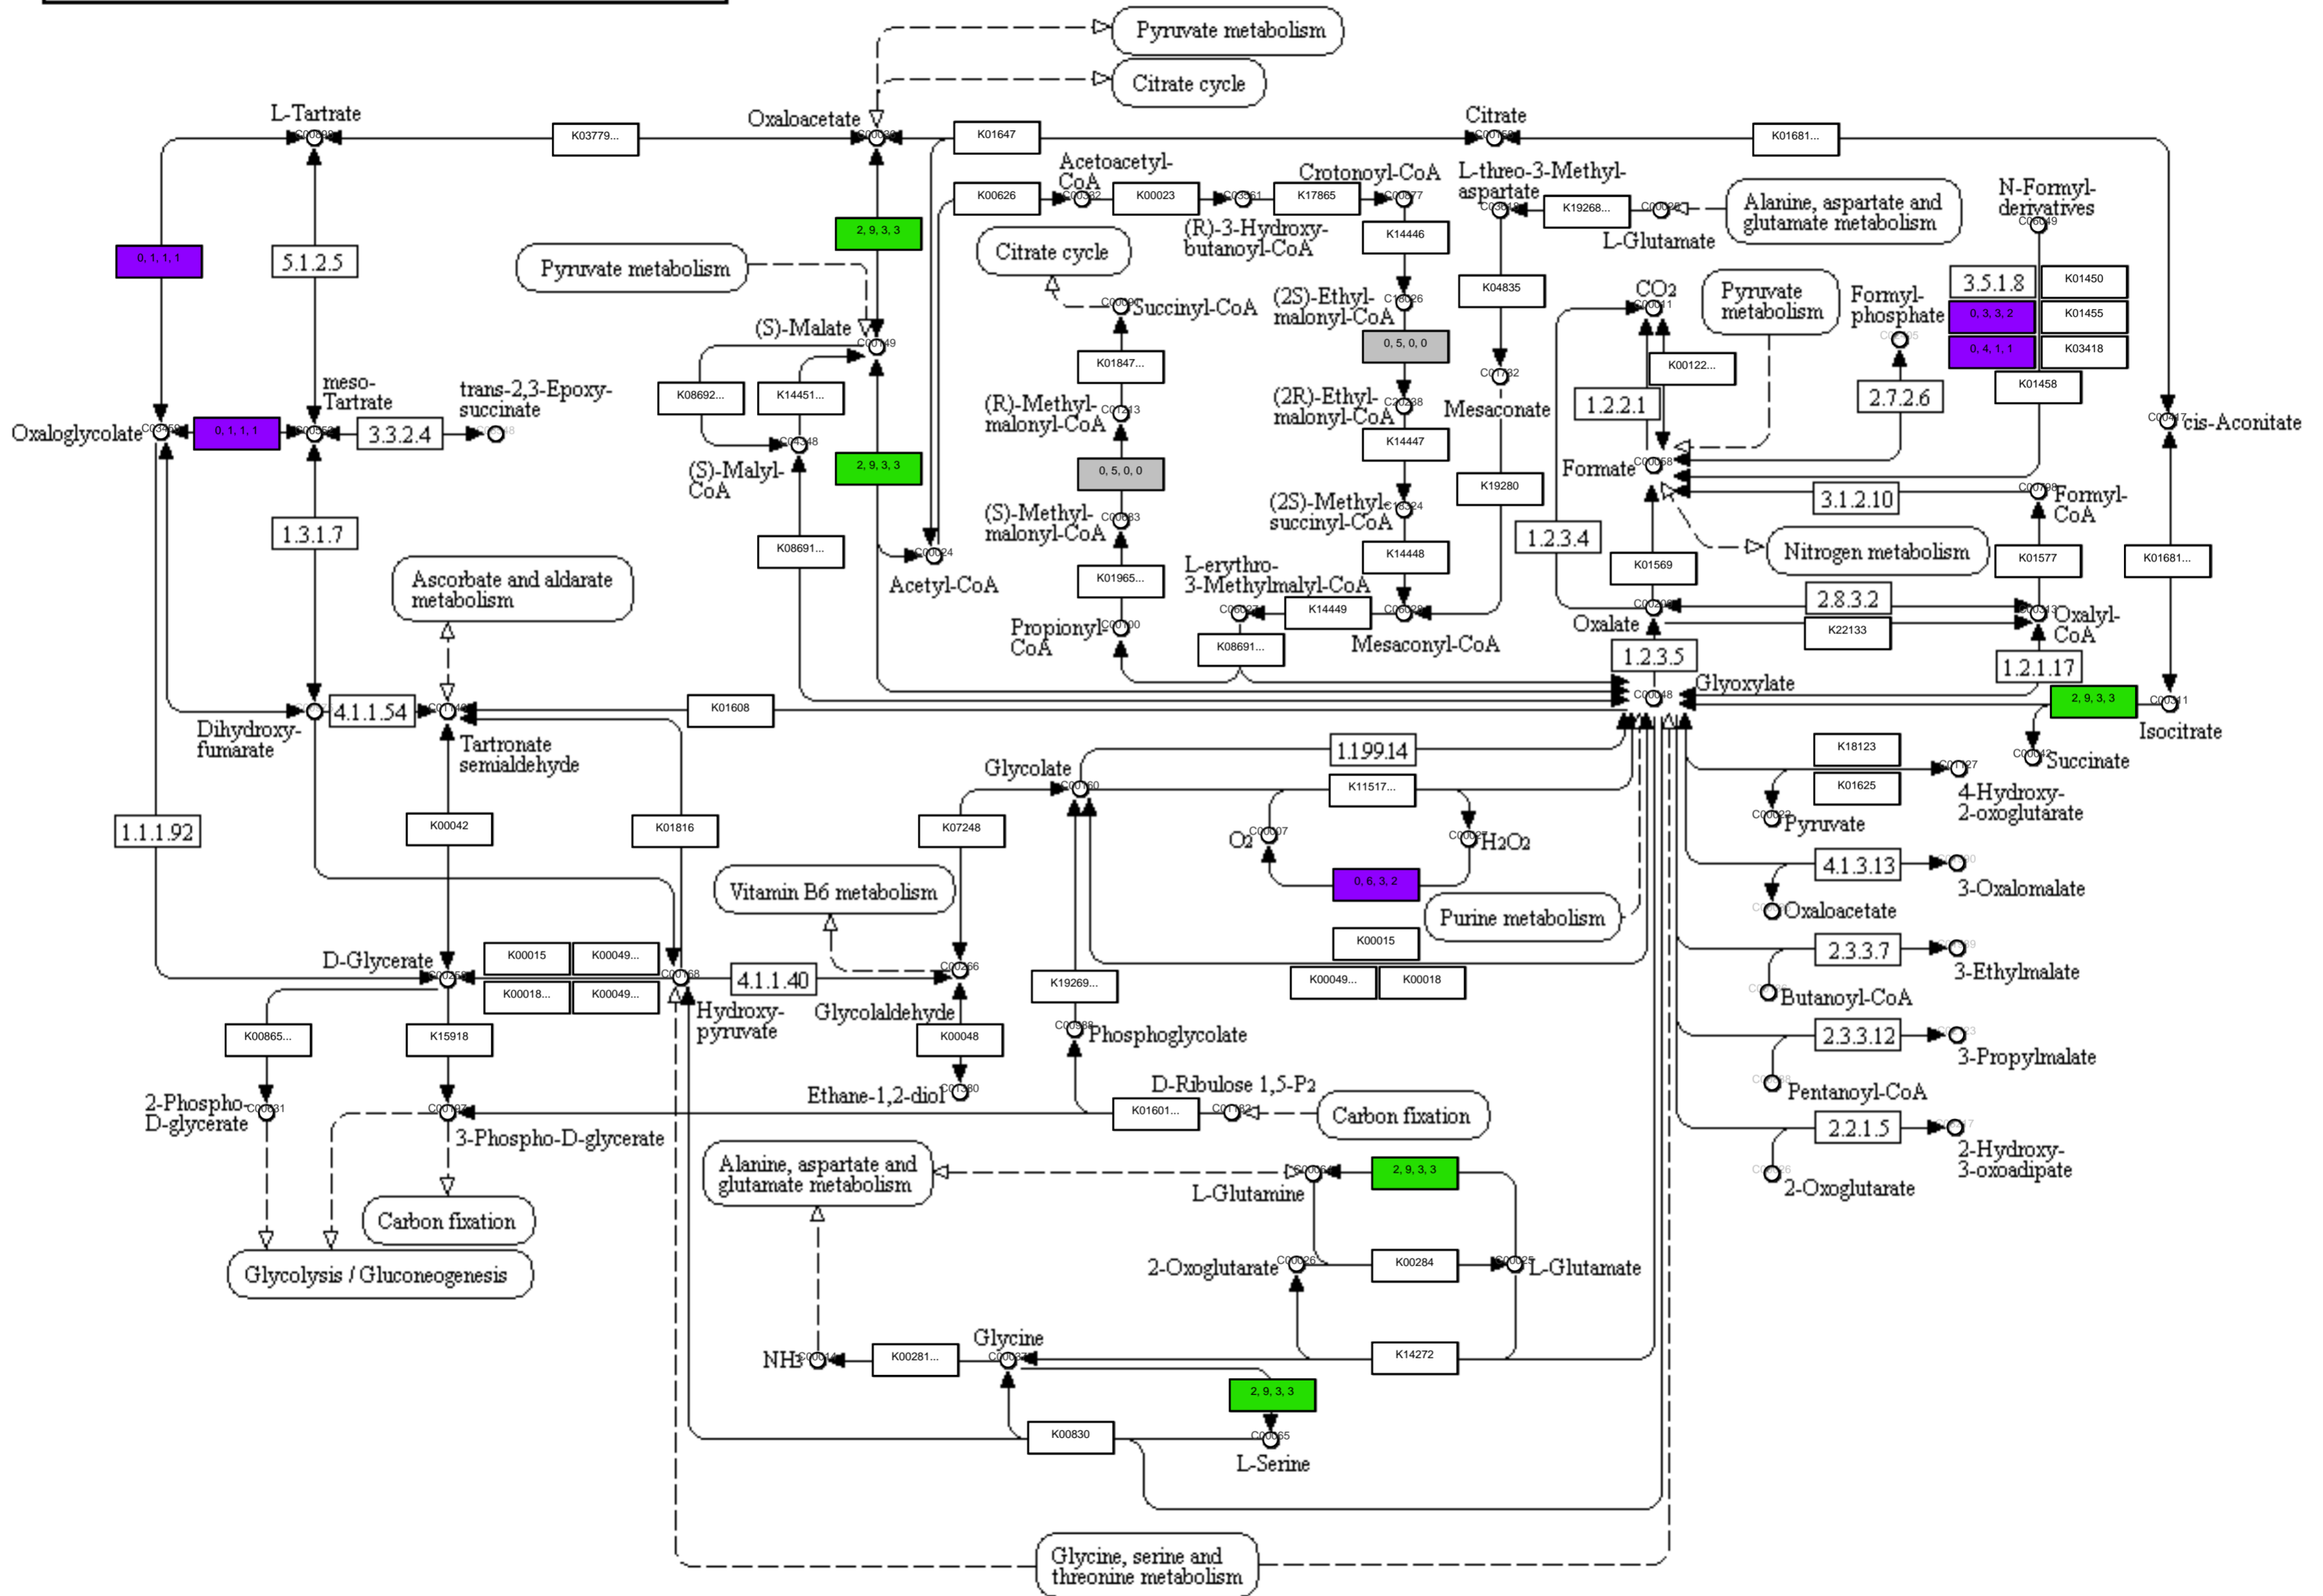







# C<sub>5</sub>-BRANCHED DIBASIC ACID METABOLISM

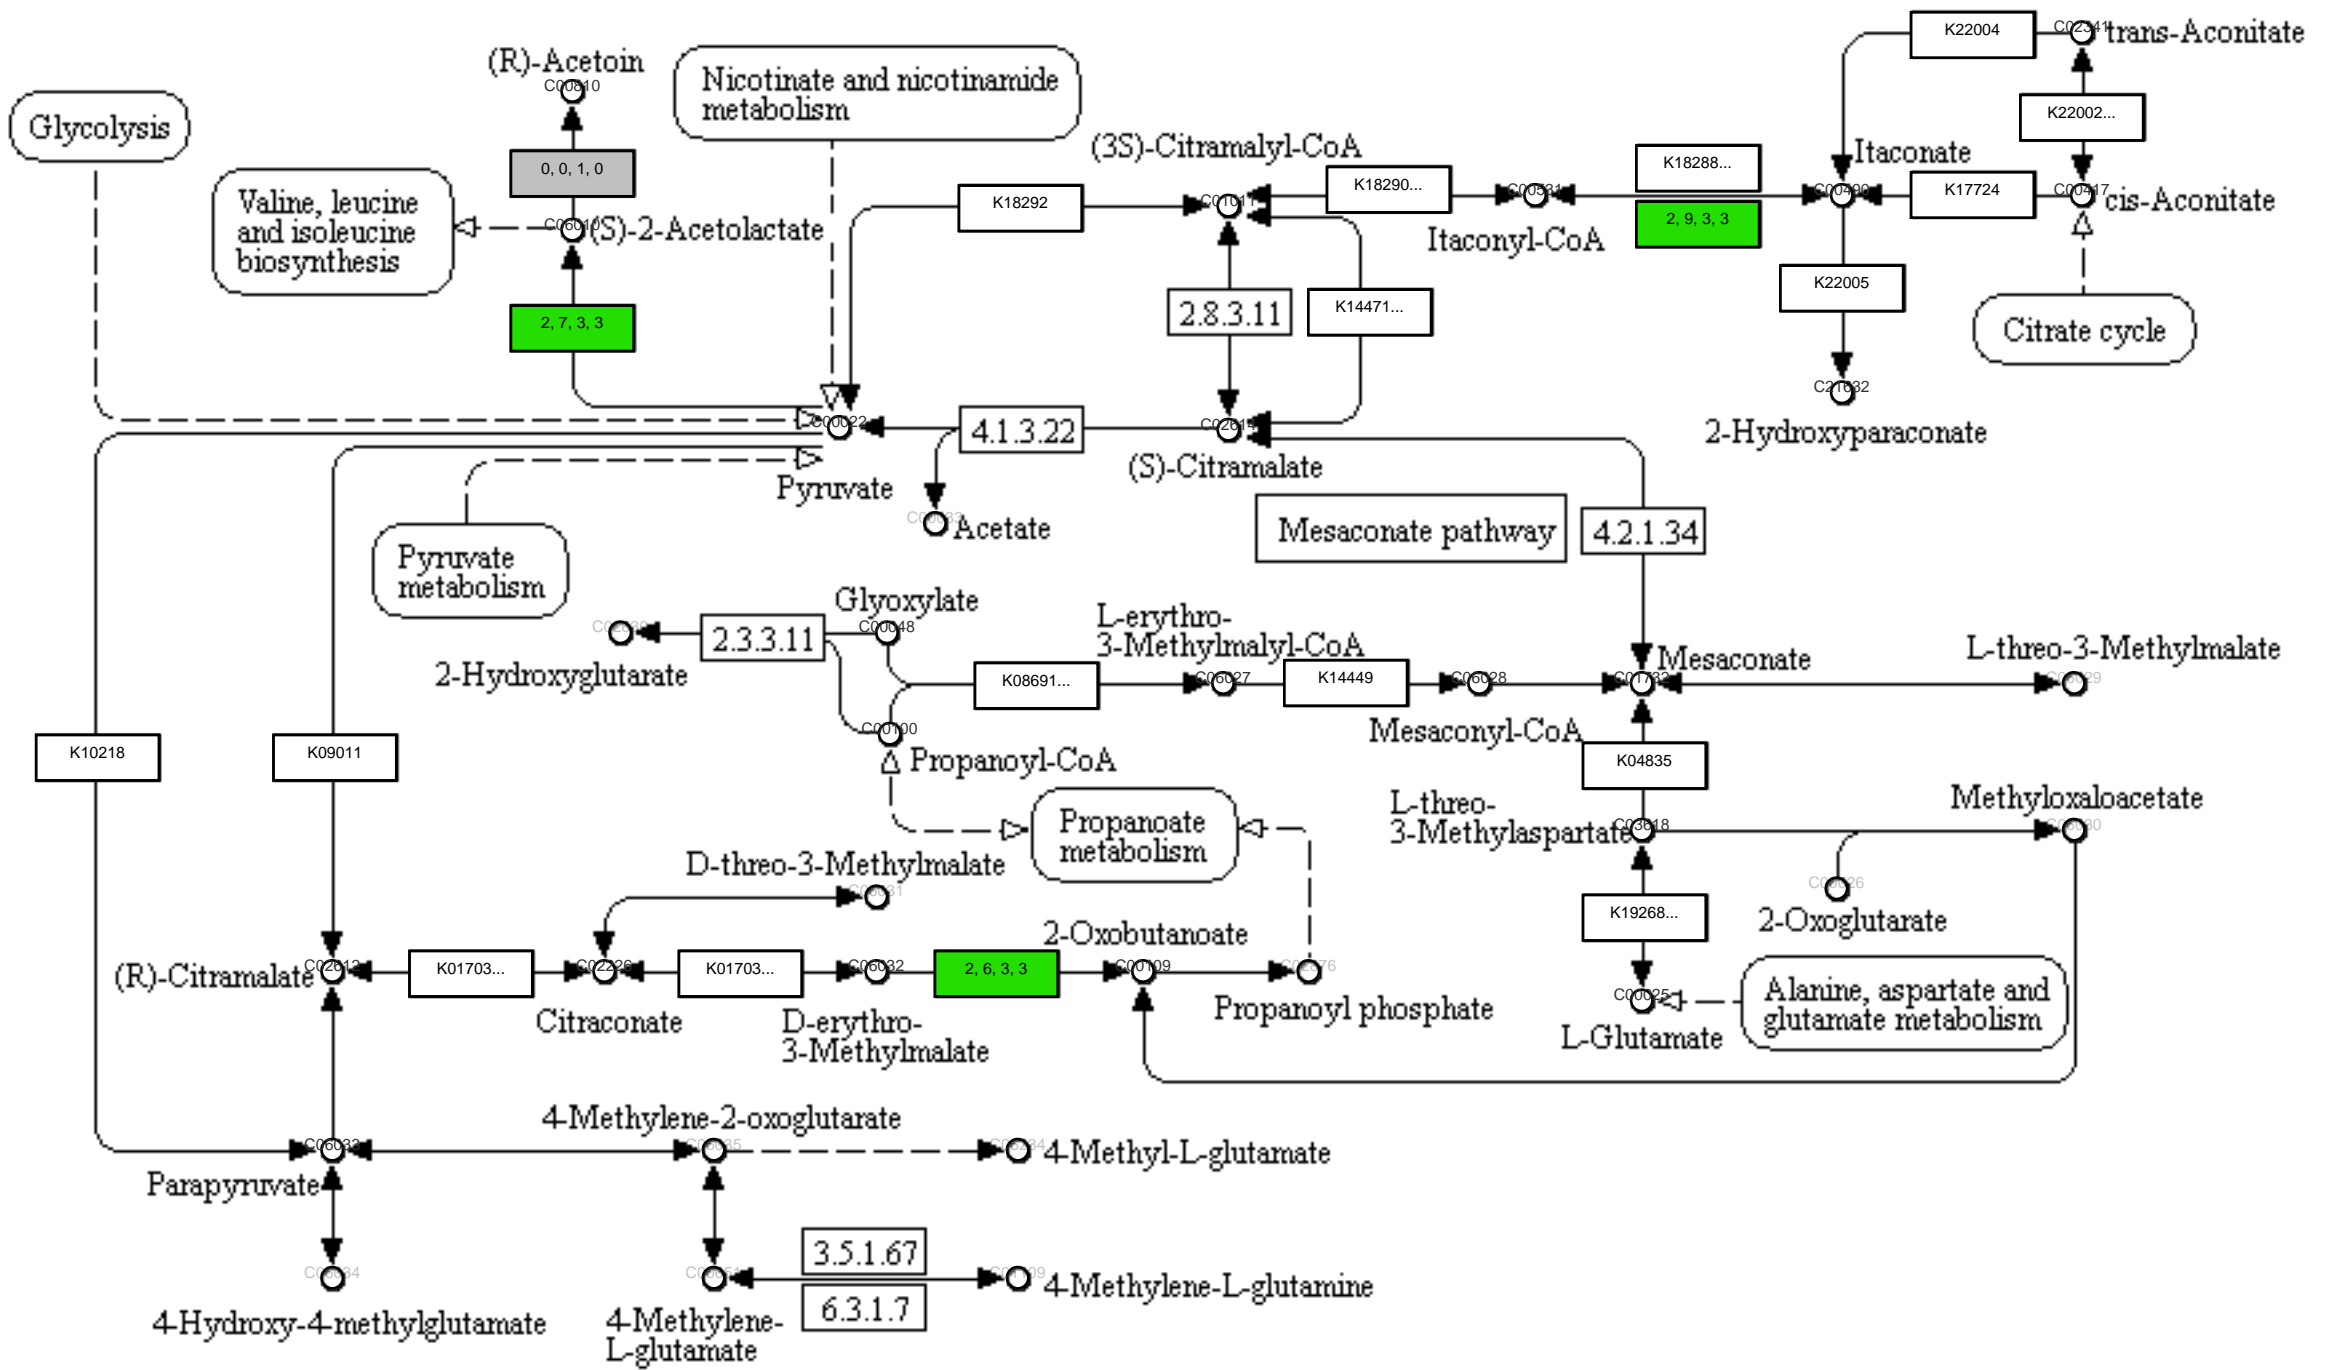

## 2. Energy metabolism

| MAP        | PATHWAY                   |
|------------|---------------------------|
| <b>190</b> | Oxidative phosphorylation |
| <b>680</b> | Methane metabolism        |
| <b>910</b> | Nitrogen metabolism       |
| <b>920</b> | Sulfur metabolism         |



# METHANE METABOLISM

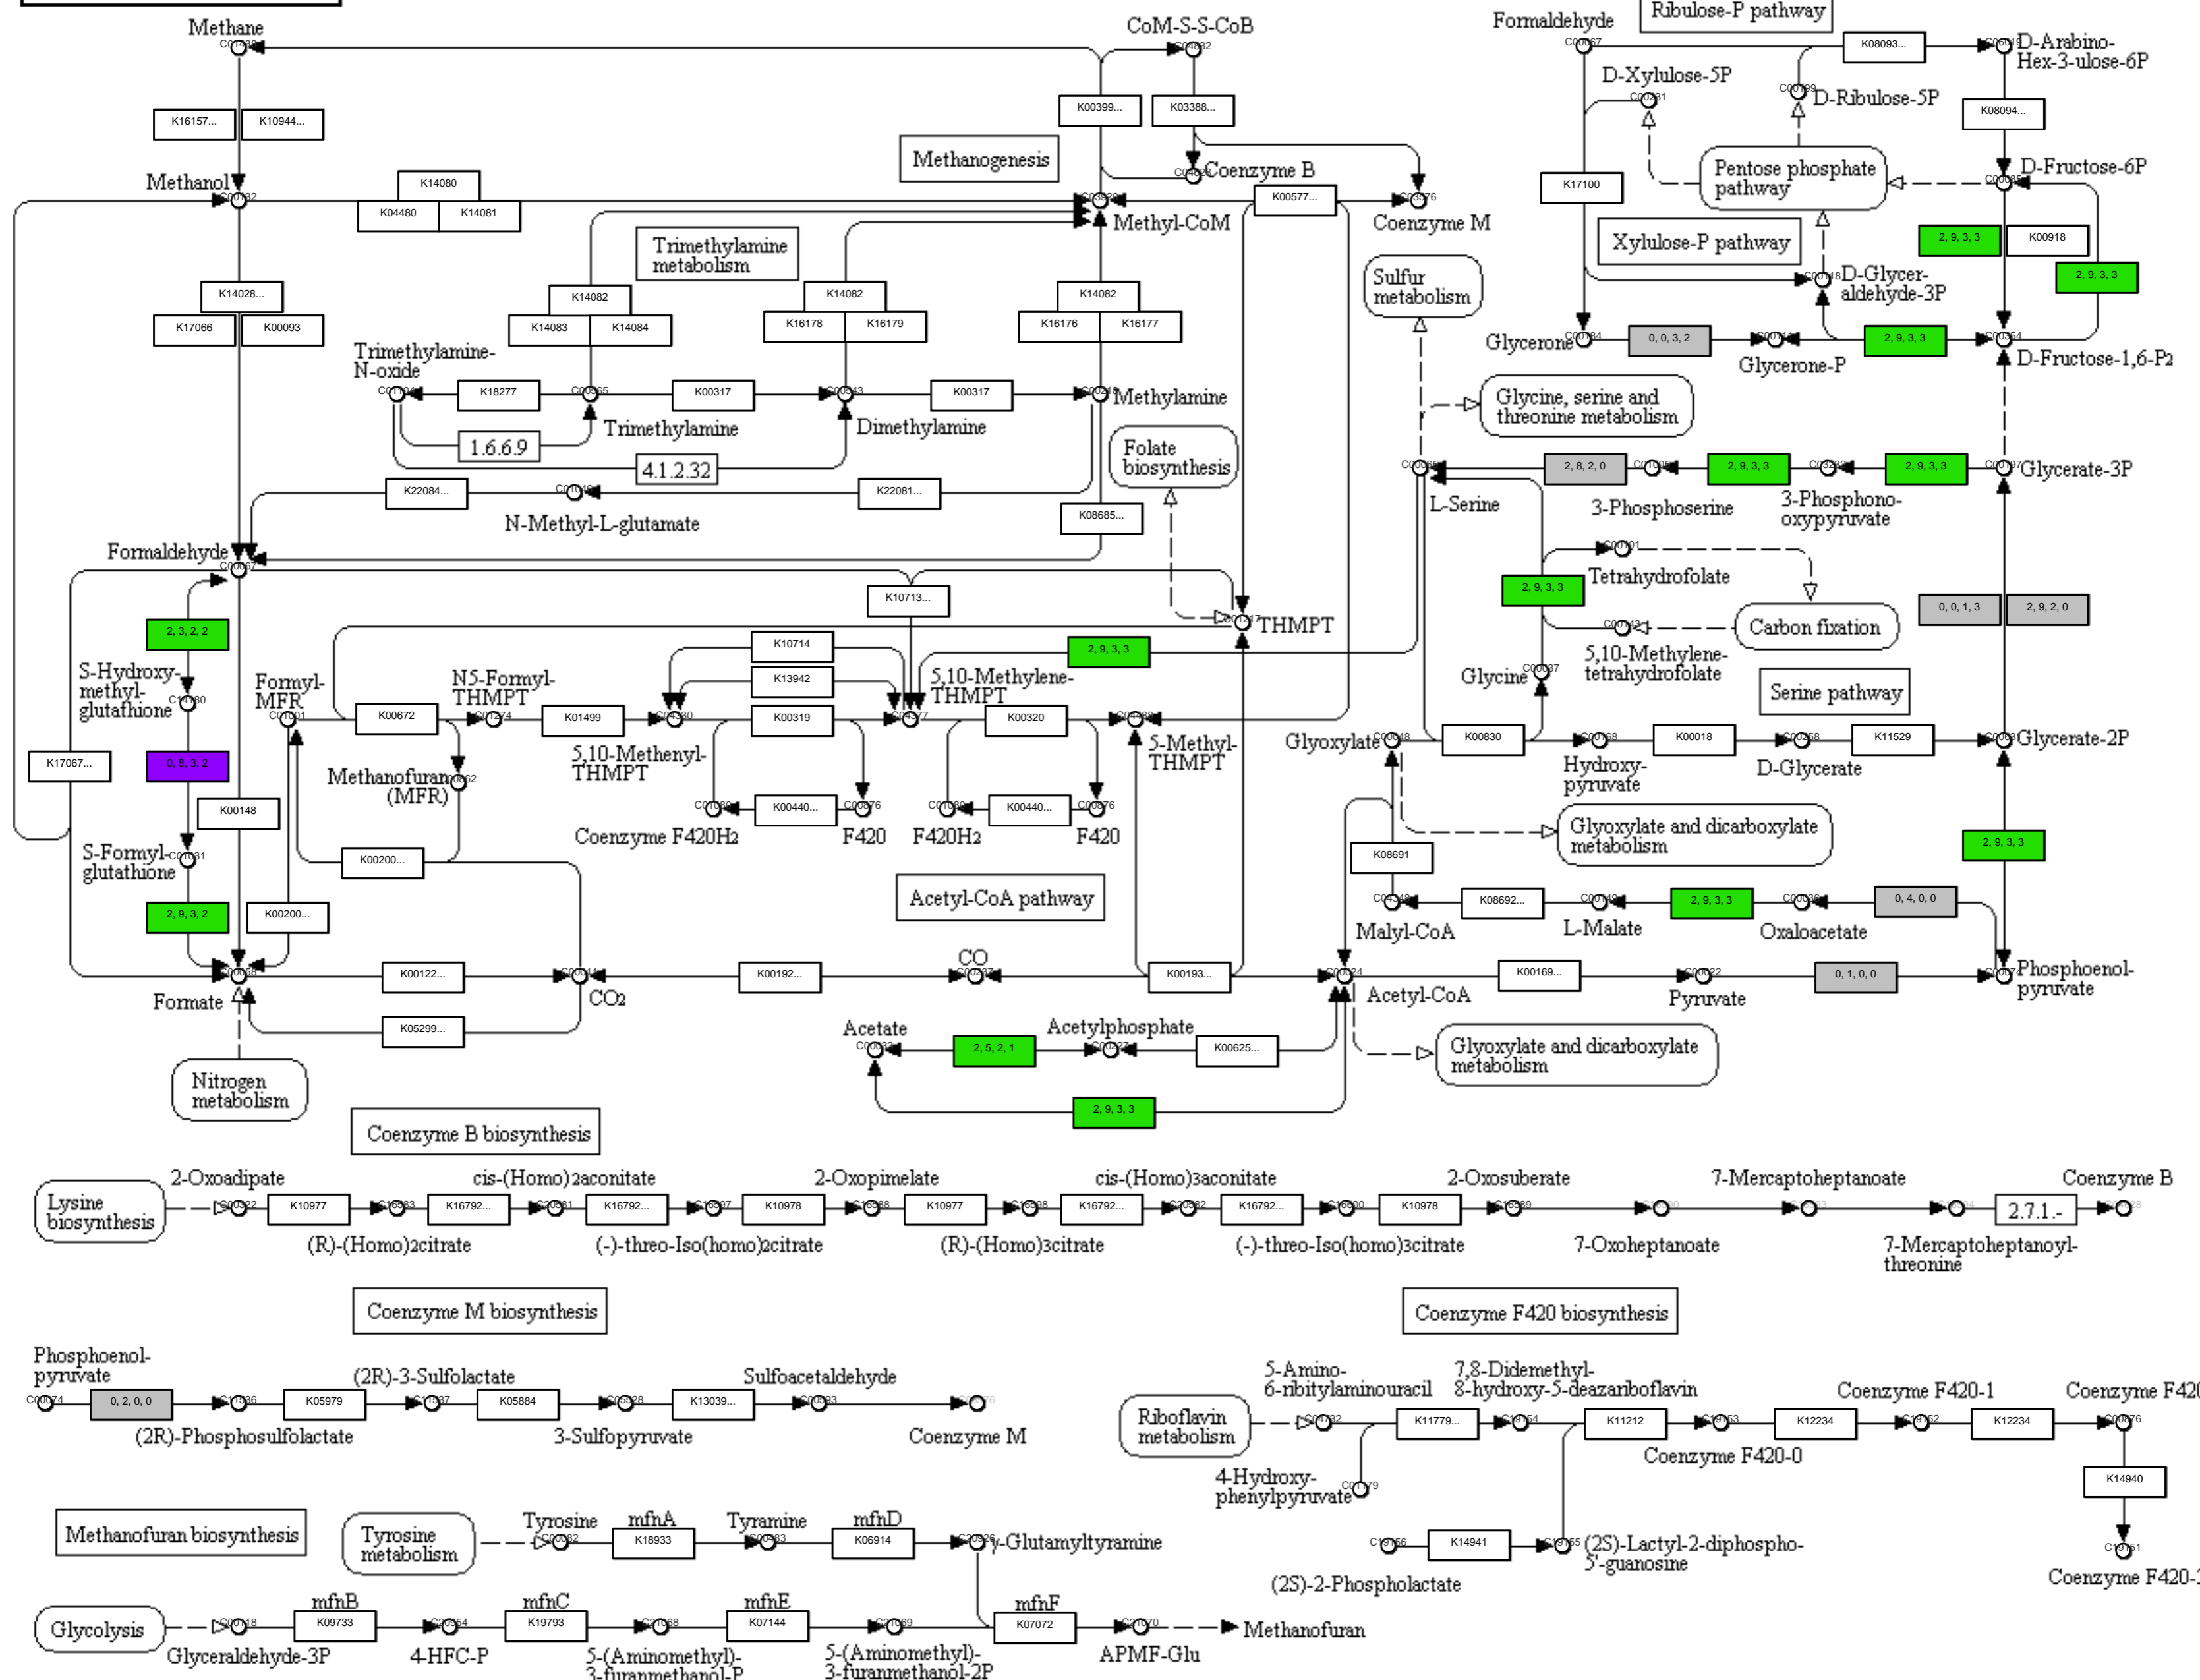



# NITROGEN METABOLISM

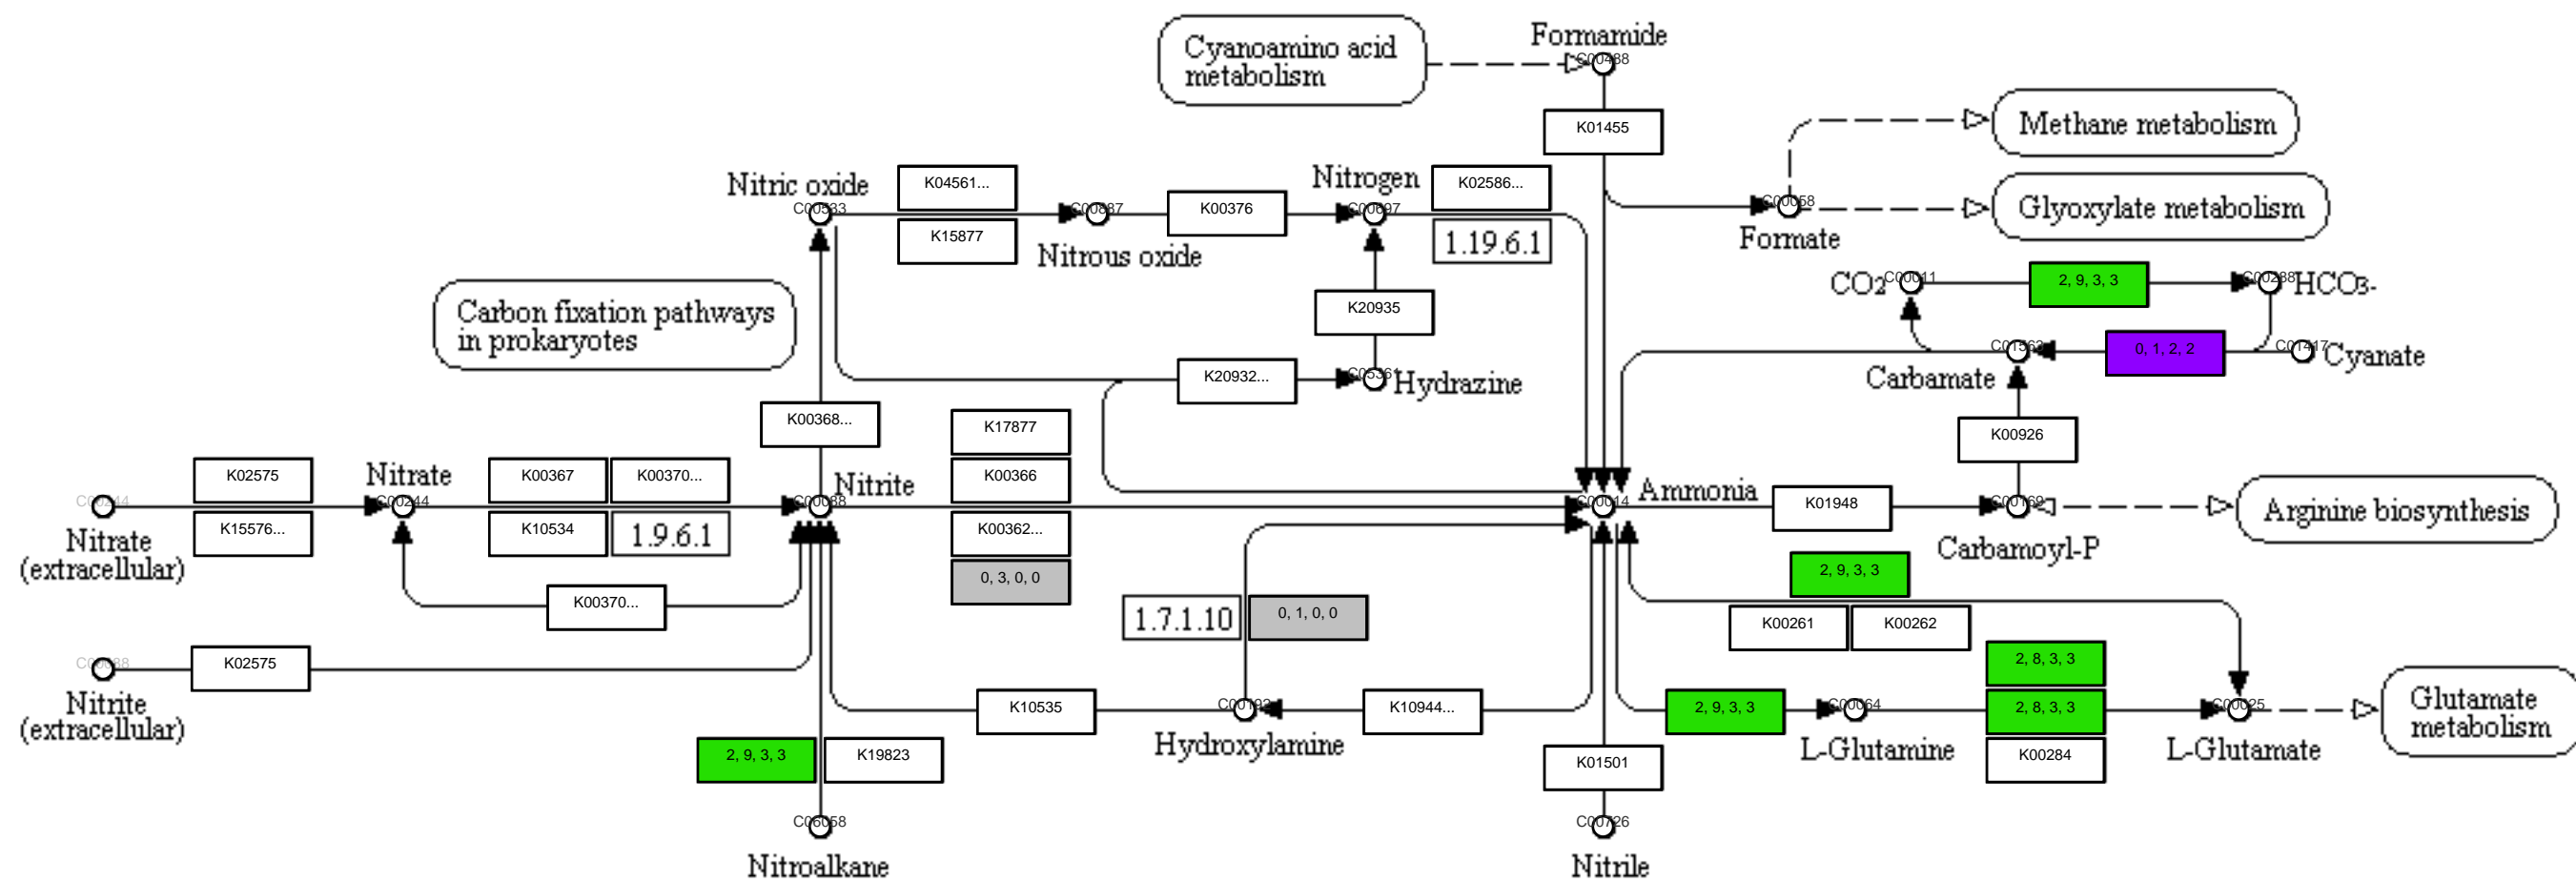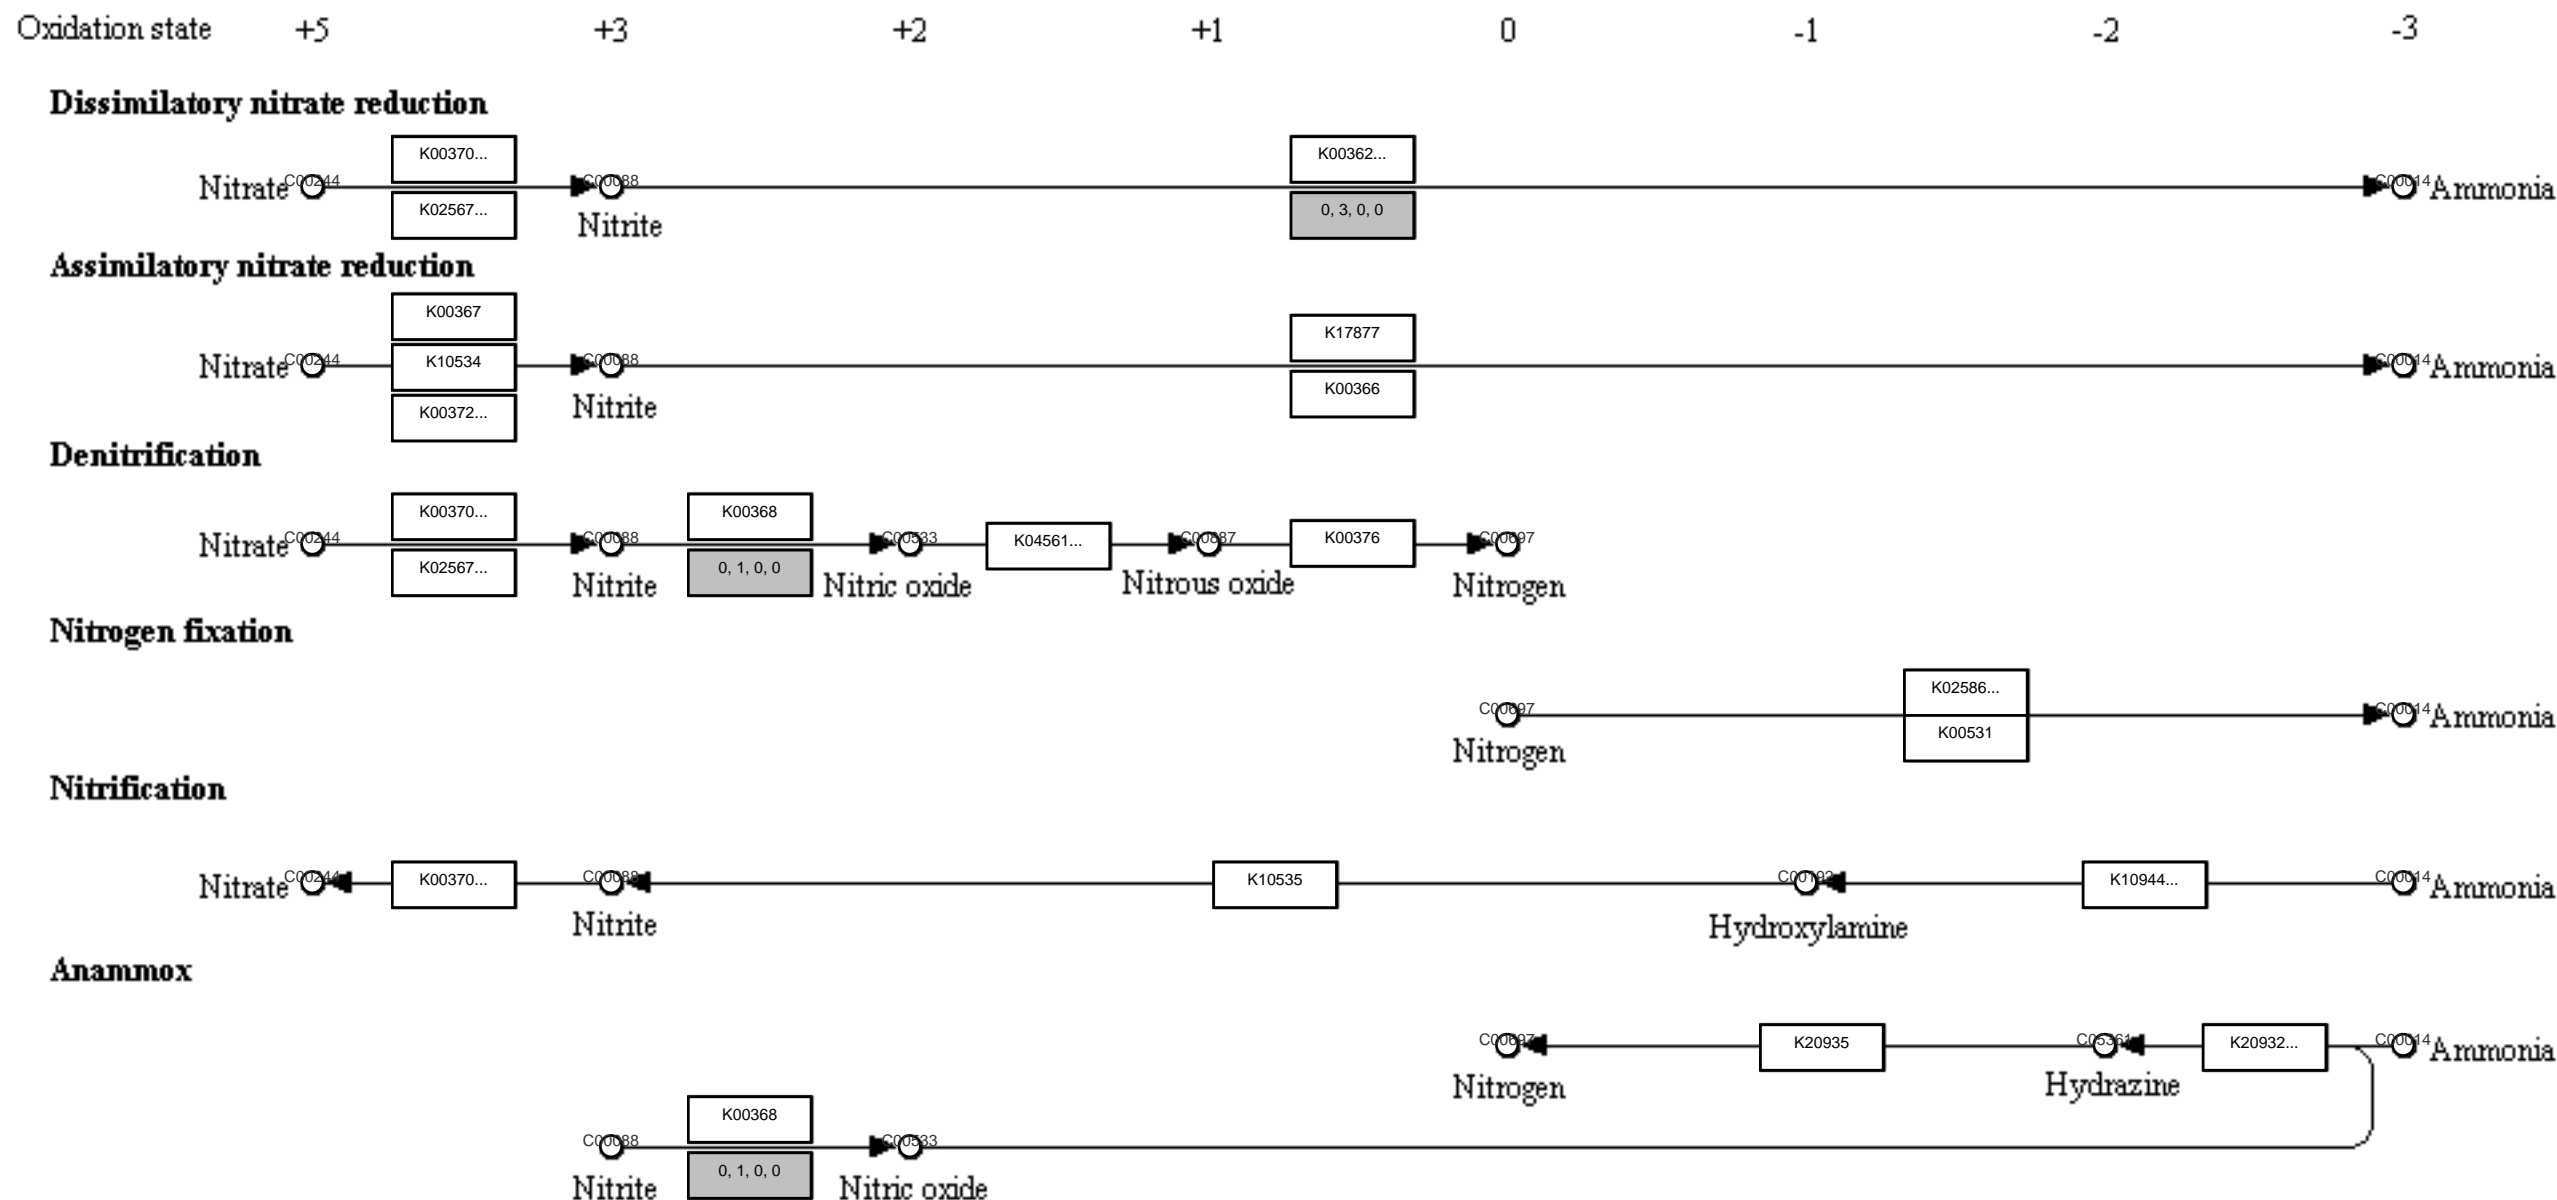

# SULFUR METABOLISM

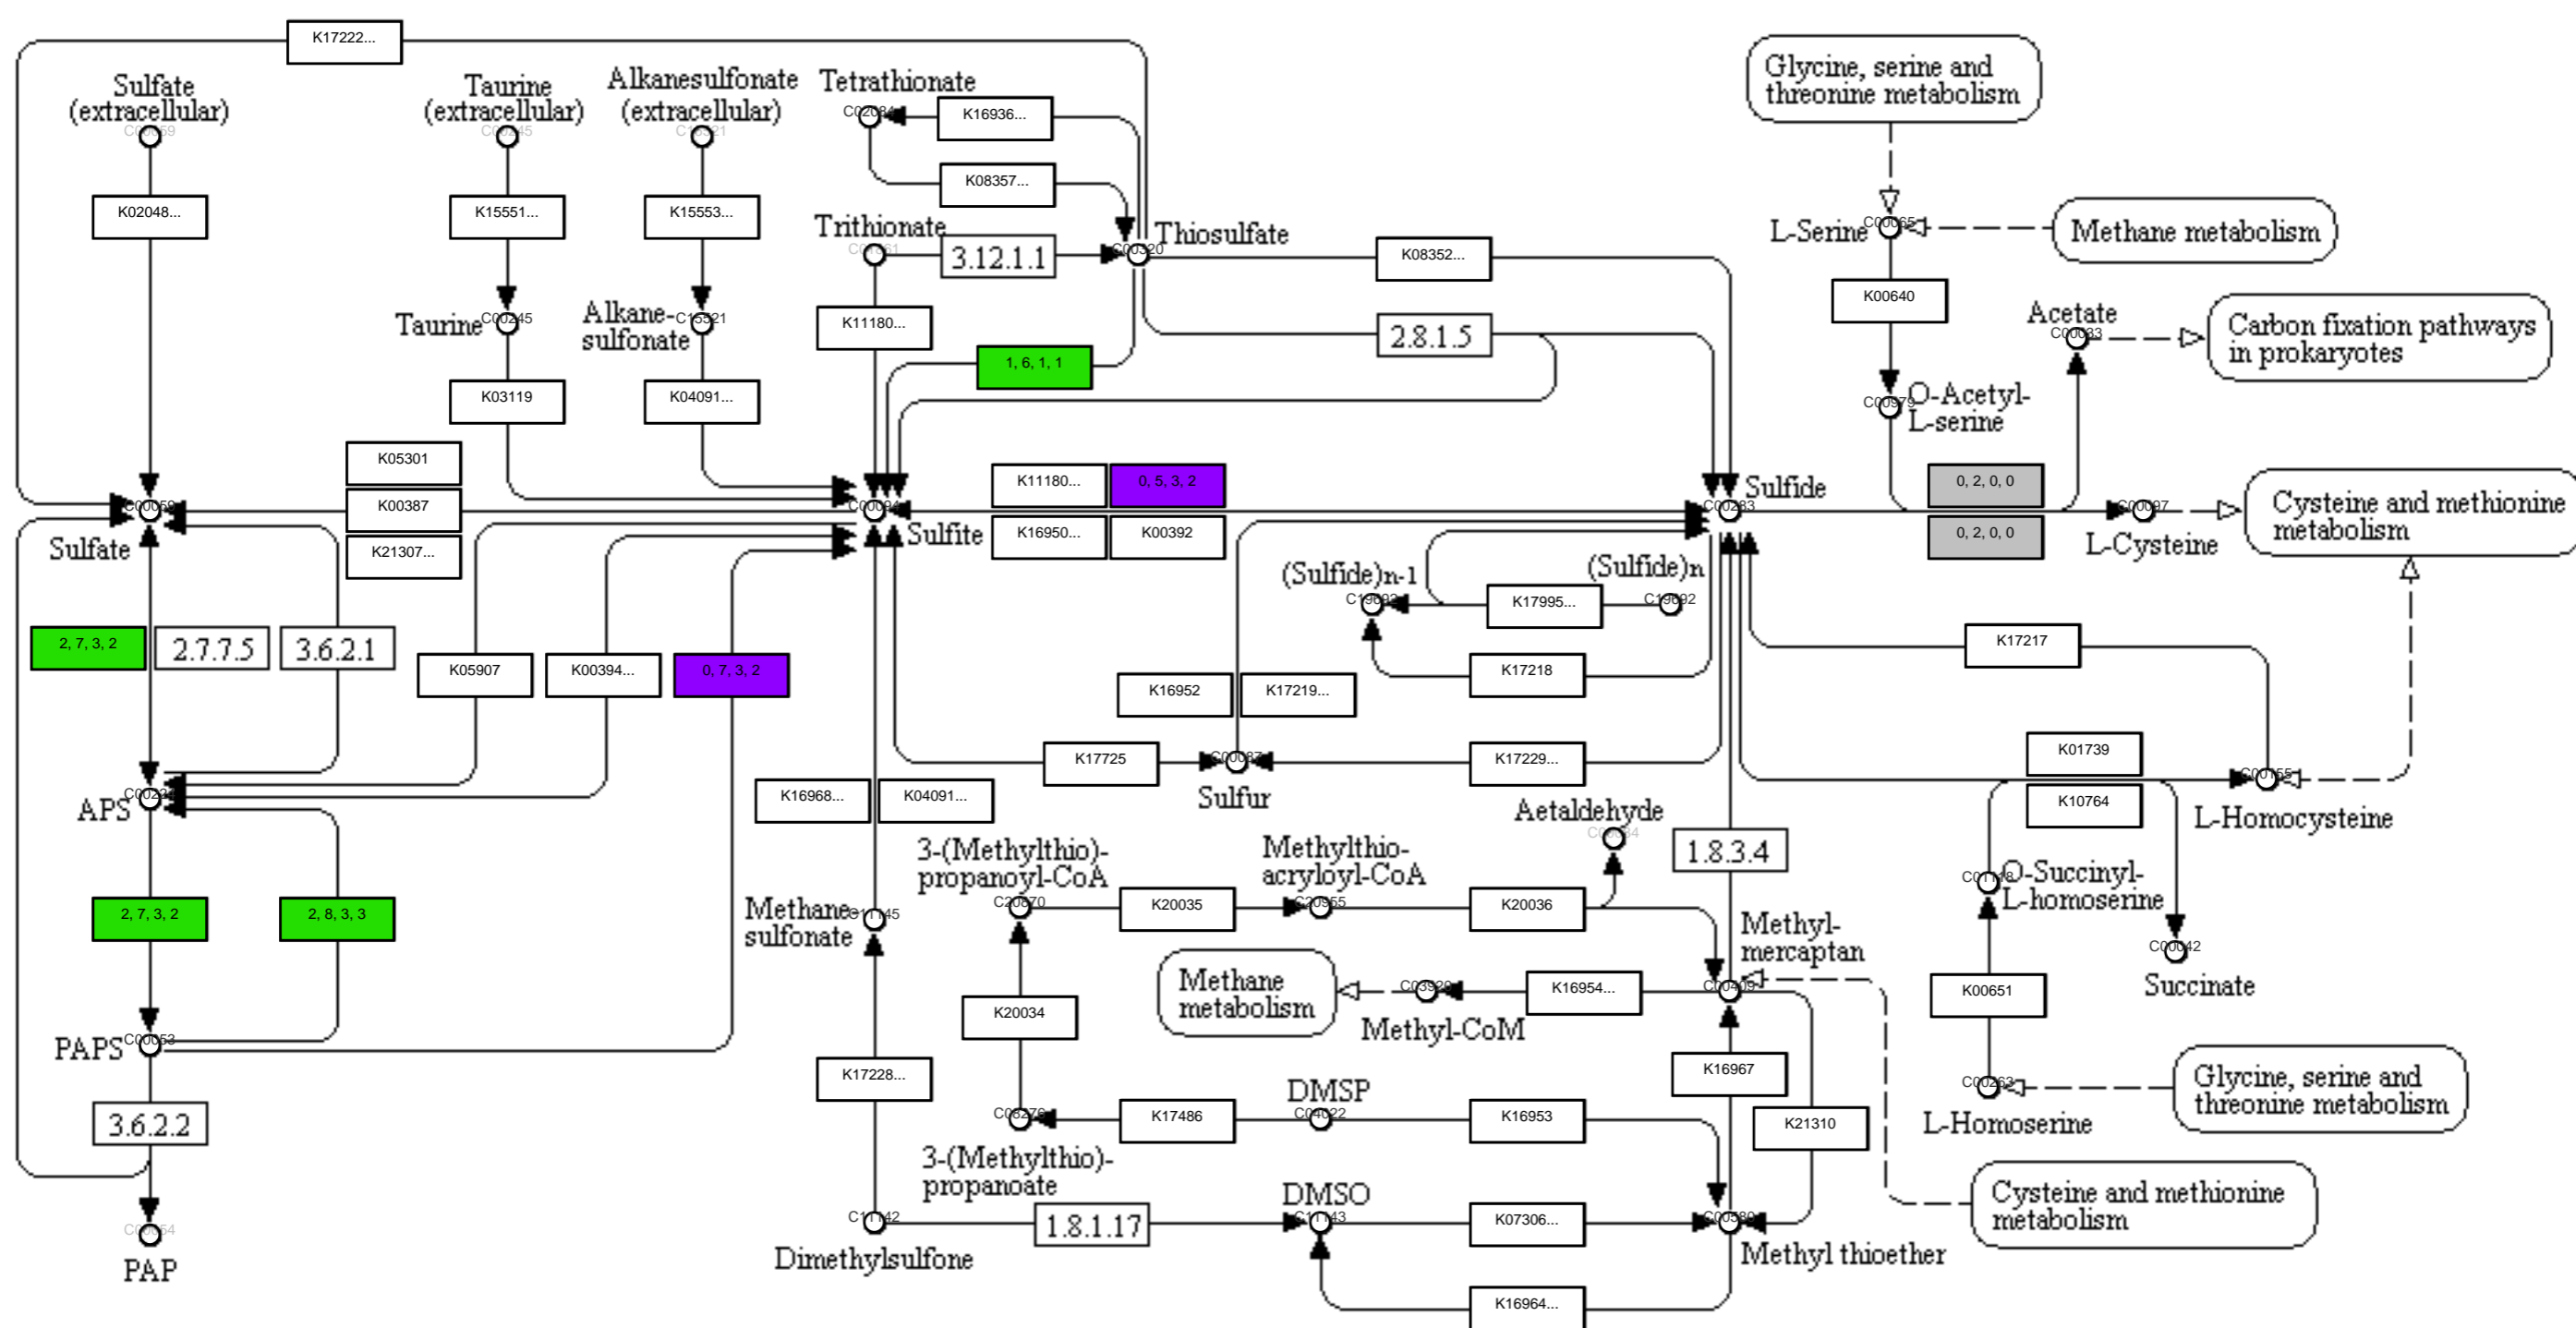

Oxidation state +6

## Assimilatory sulfate reduction

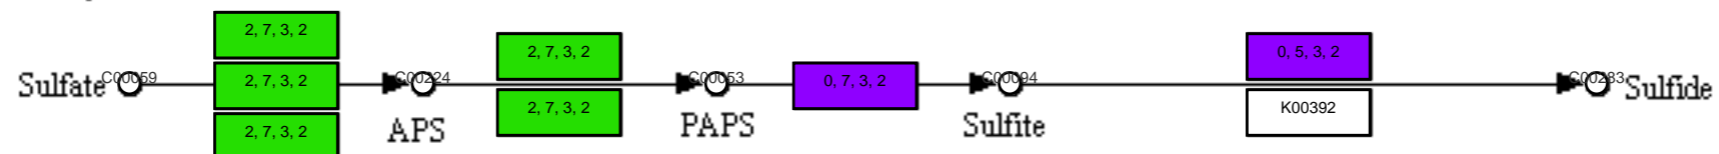

## Dissimilatory sulfate reduction and oxidation

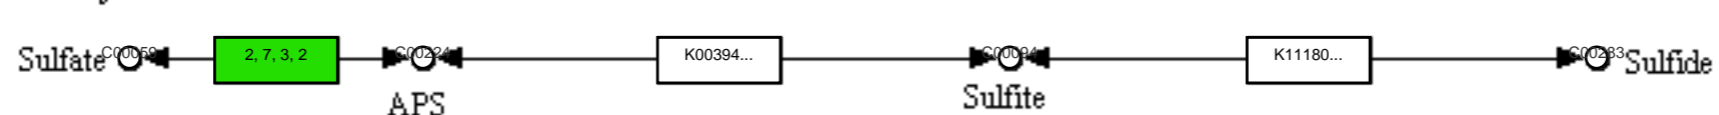

## SOX system

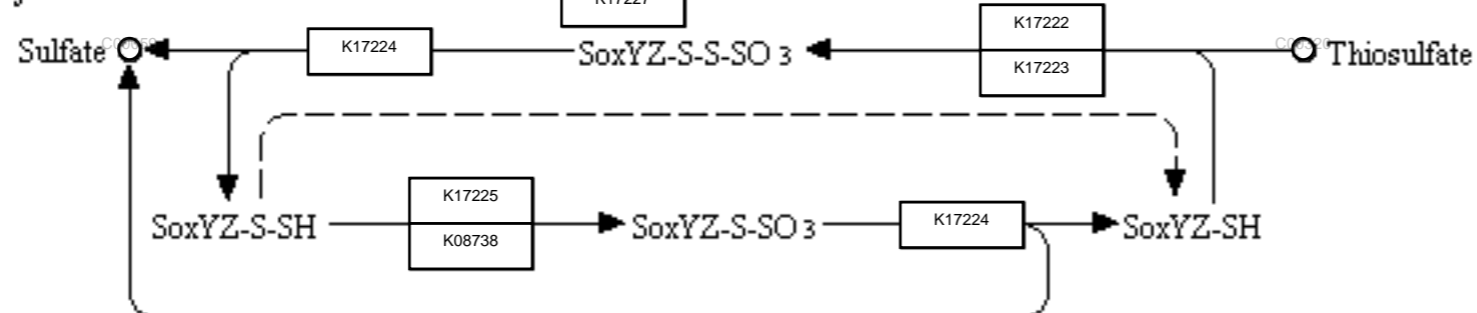

### 3. Lipid metabolism

| MAP | PATHWAY                                    |
|-----|--------------------------------------------|
| 61  | Fatty acid biosynthesis                    |
| 62  | Fatty acid elongation                      |
| 71  | Fatty acid degradation                     |
| 72  | Synthesis and degradation of ketone bodies |
| 100 | Steroid biosynthesis                       |
| 561 | Glycerolipid metabolism                    |
| 564 | Glycerophospholipid metabolism             |
| 565 | Ether lipid metabolism                     |
| 590 | Arachidonic acid metabolism                |
| 592 | alpha-Linolenic acid metabolism            |
| 600 | Sphingolipid metabolism                    |



# FATTY ACID BIOSYNTHESIS

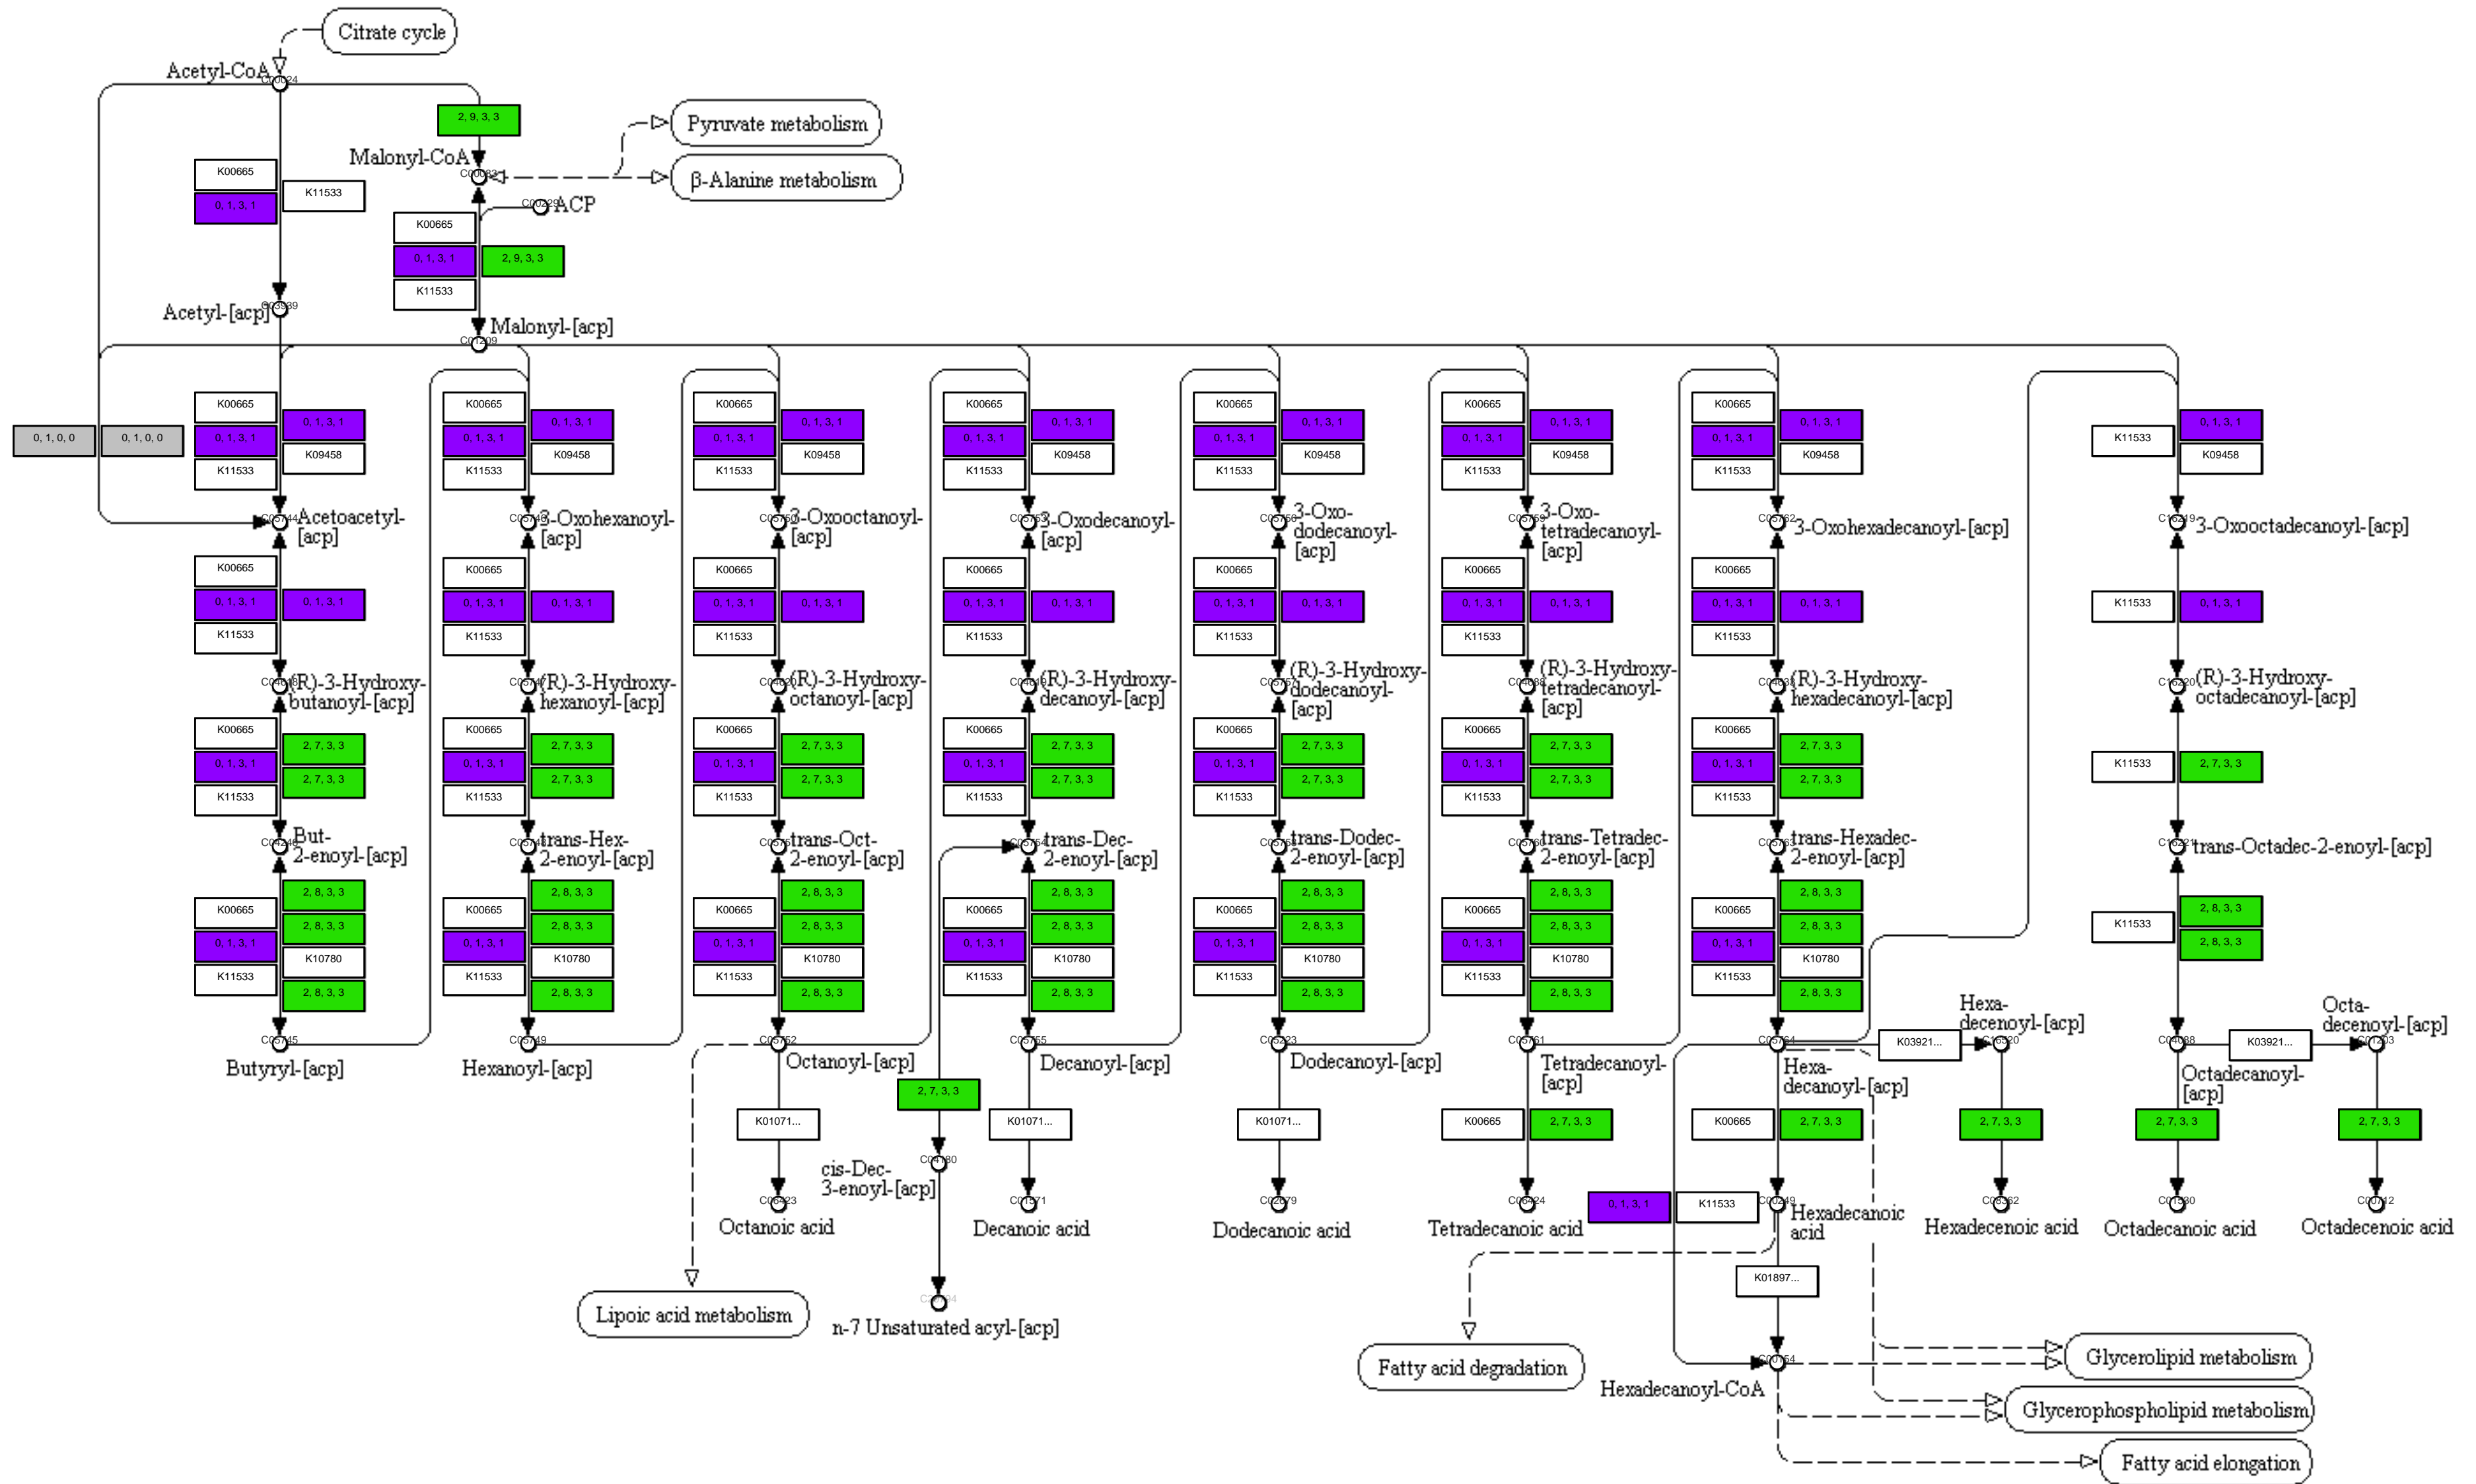

# FATTY ACID ELONGATION

In mitochondria ( $4 < n < 16$ )

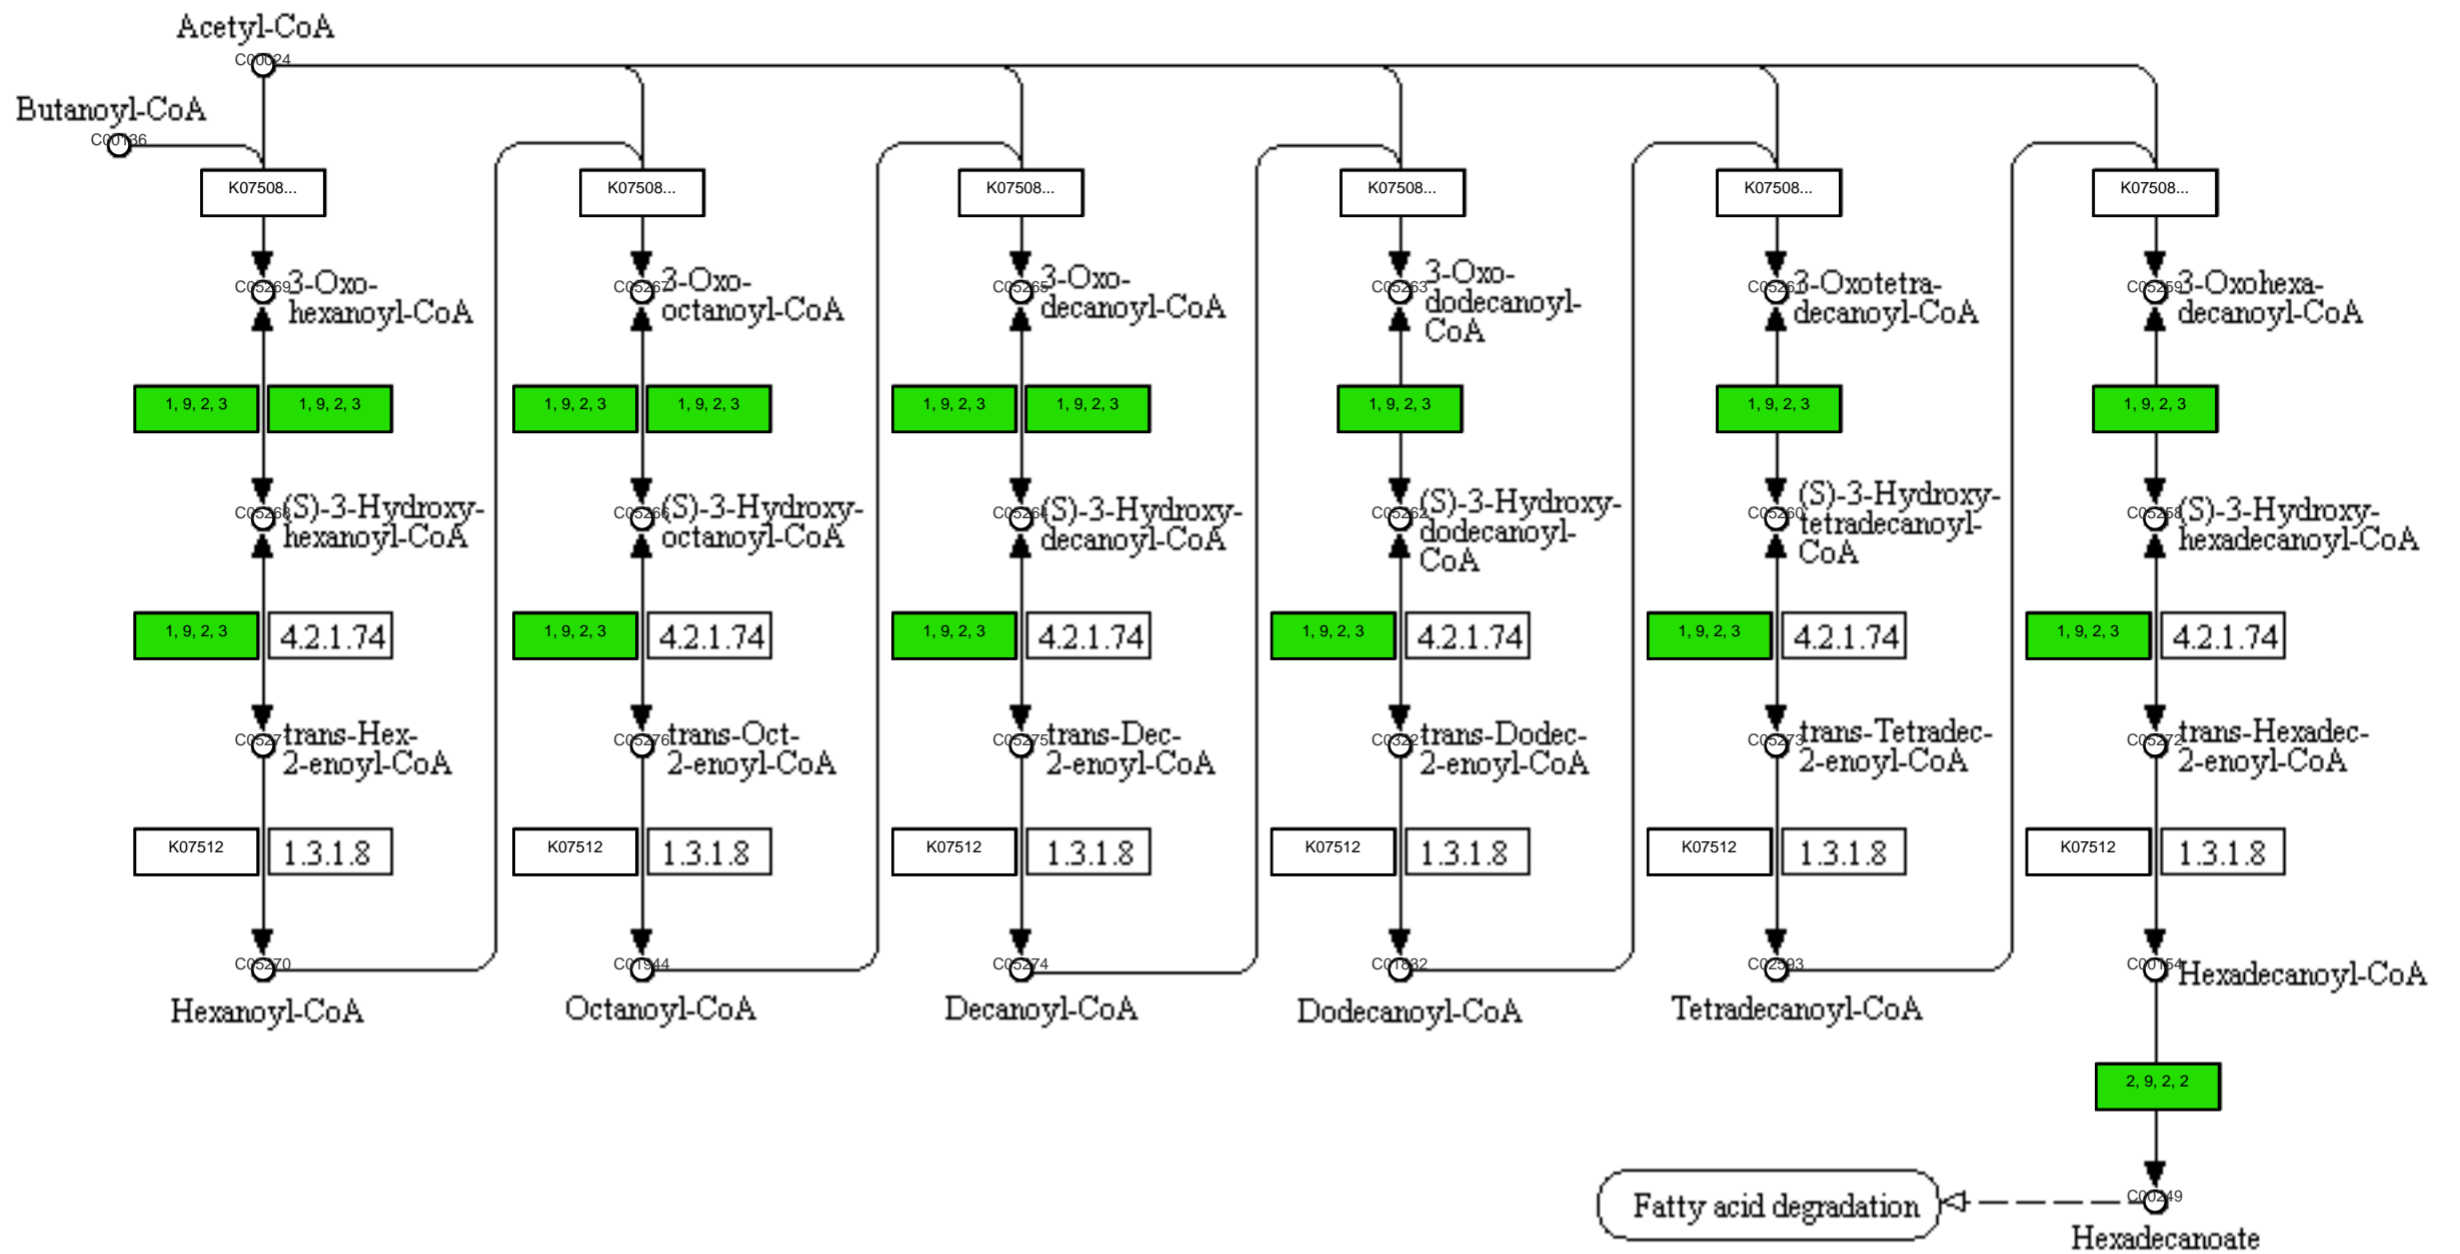

General forms  
In mitochondria ( $4 < n < 16$ )

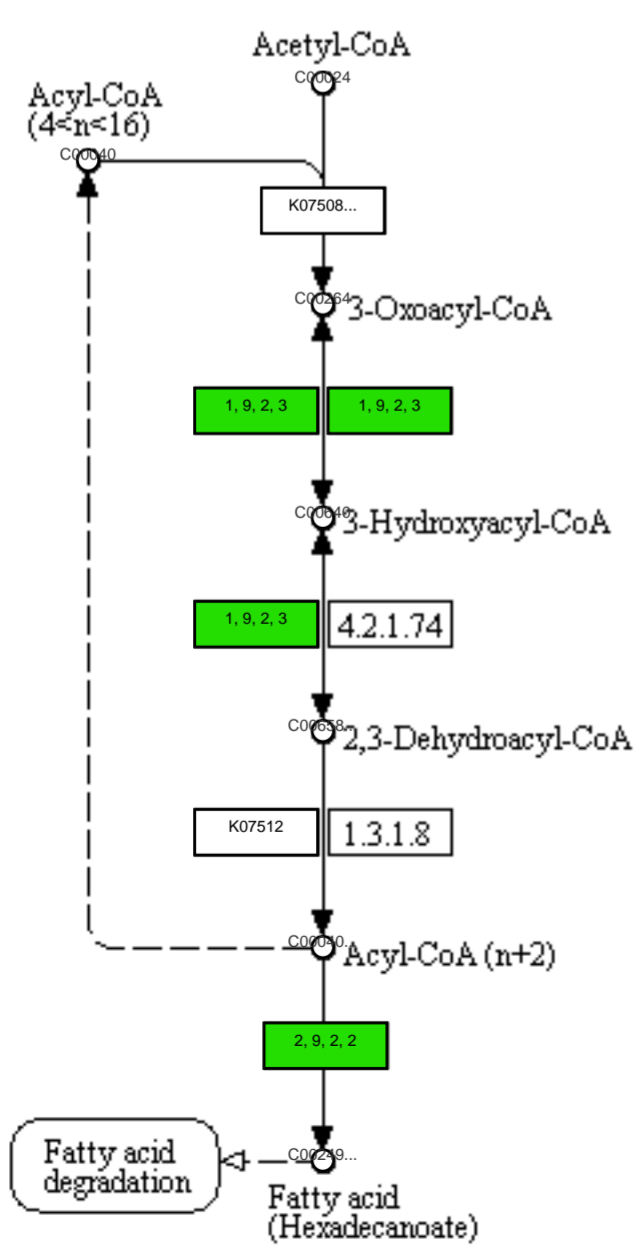

In endoplasmic reticulum ( $n \geq 16$ )

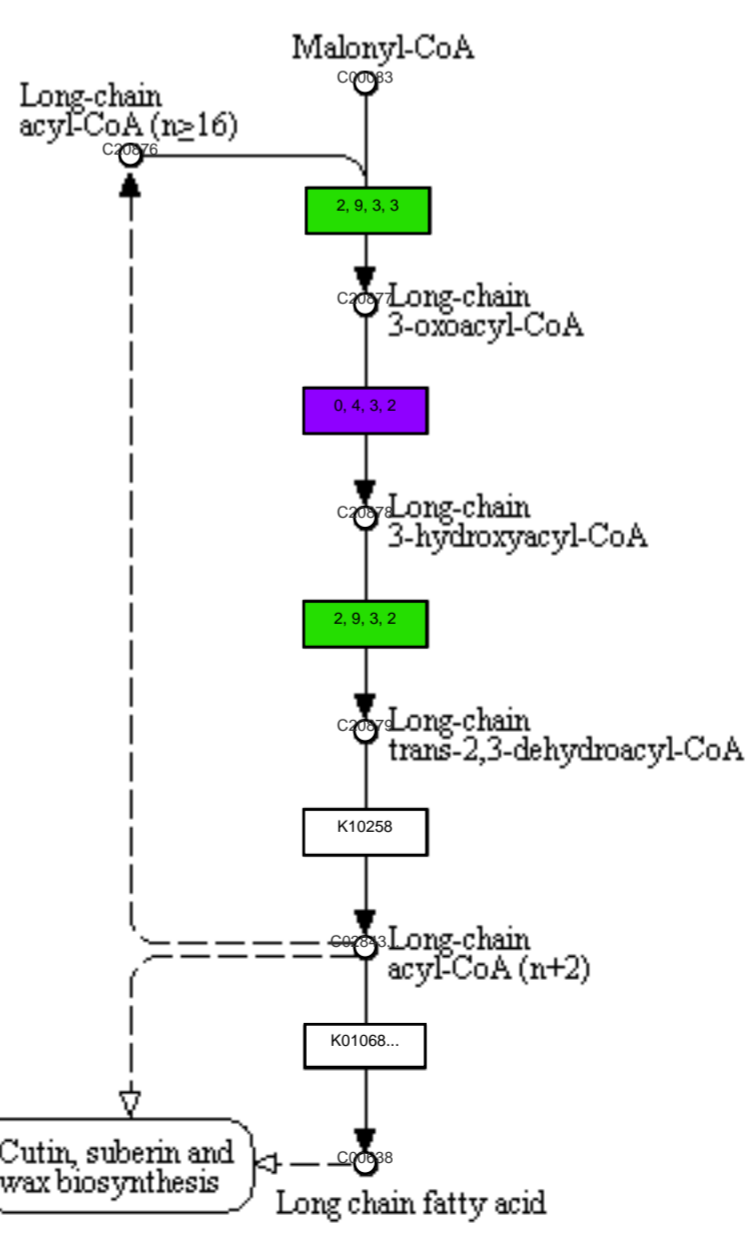

# FATTY ACID DEGRADATION

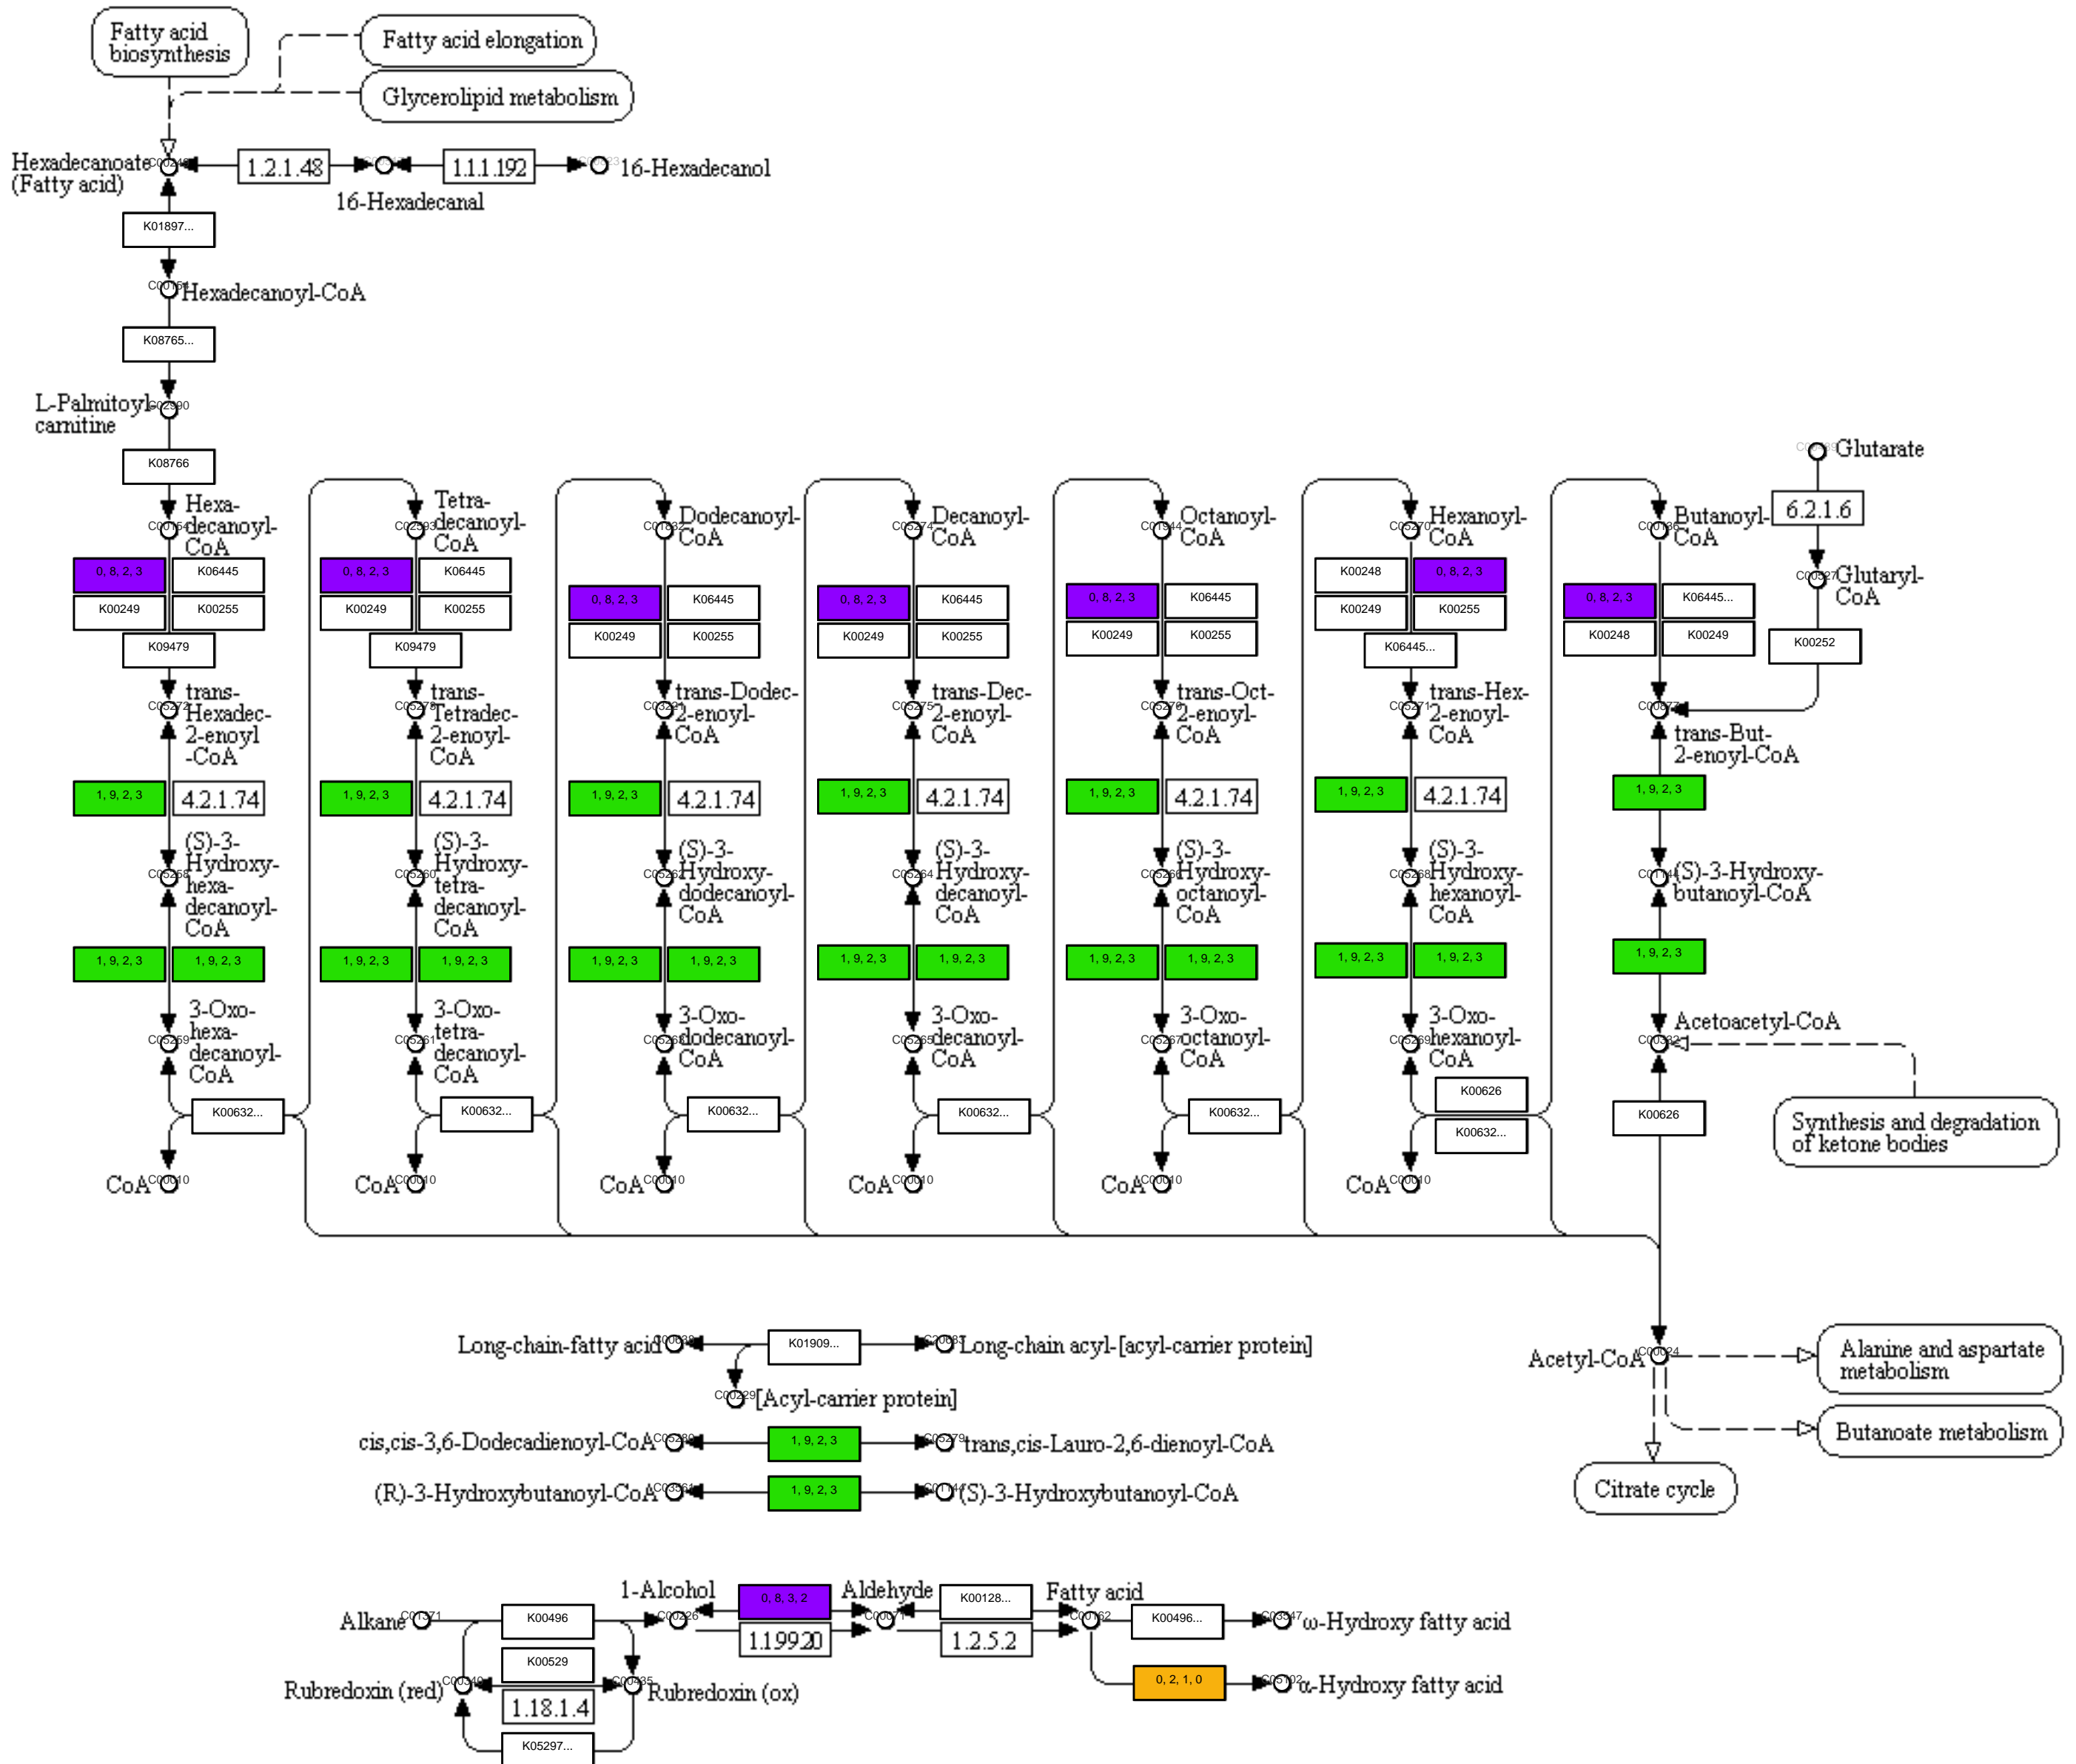

# SYNTHESIS AND DEGRADATION OF KETONE BODIES

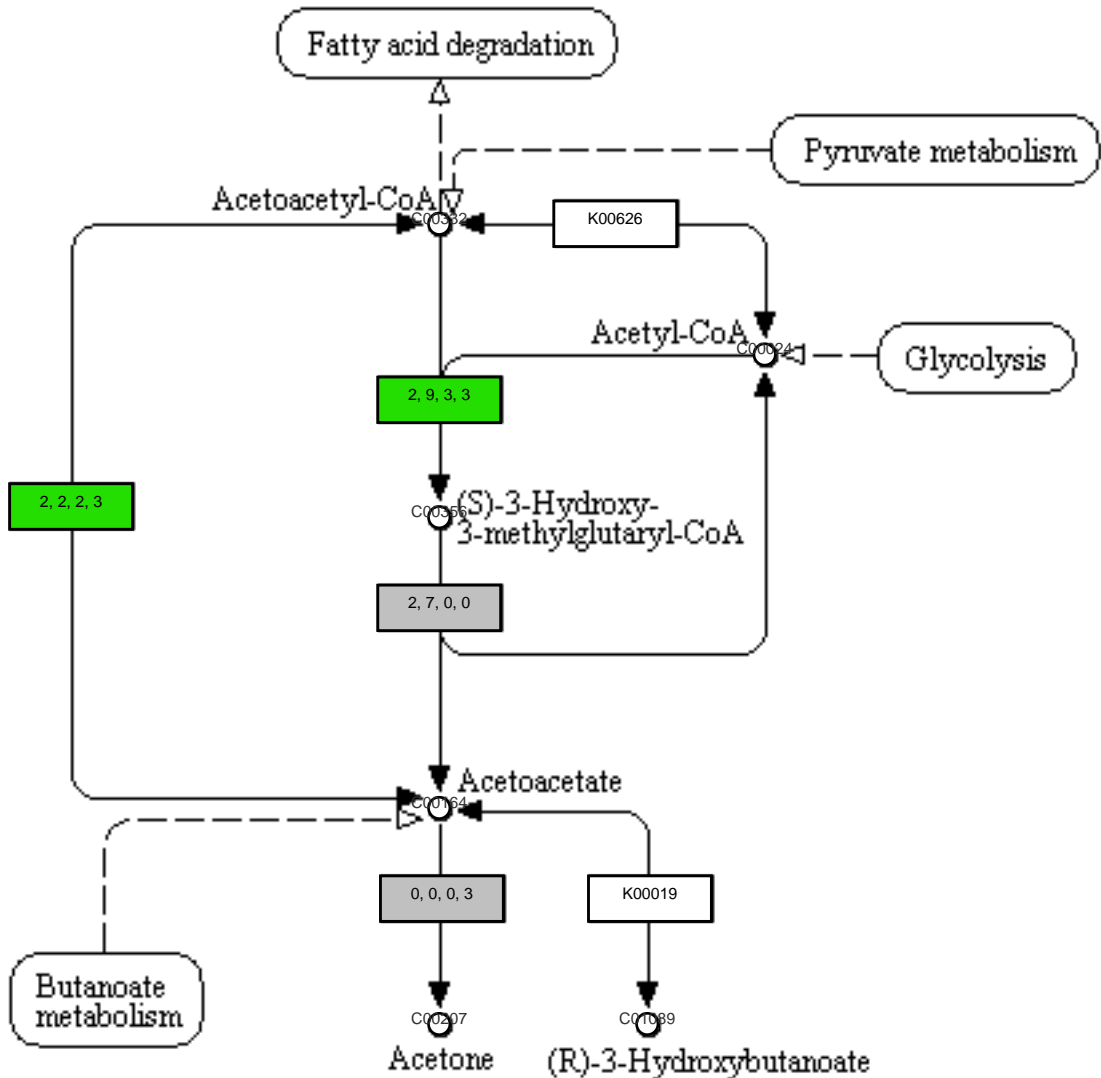



# GLYCEROLIPID METABOLISM

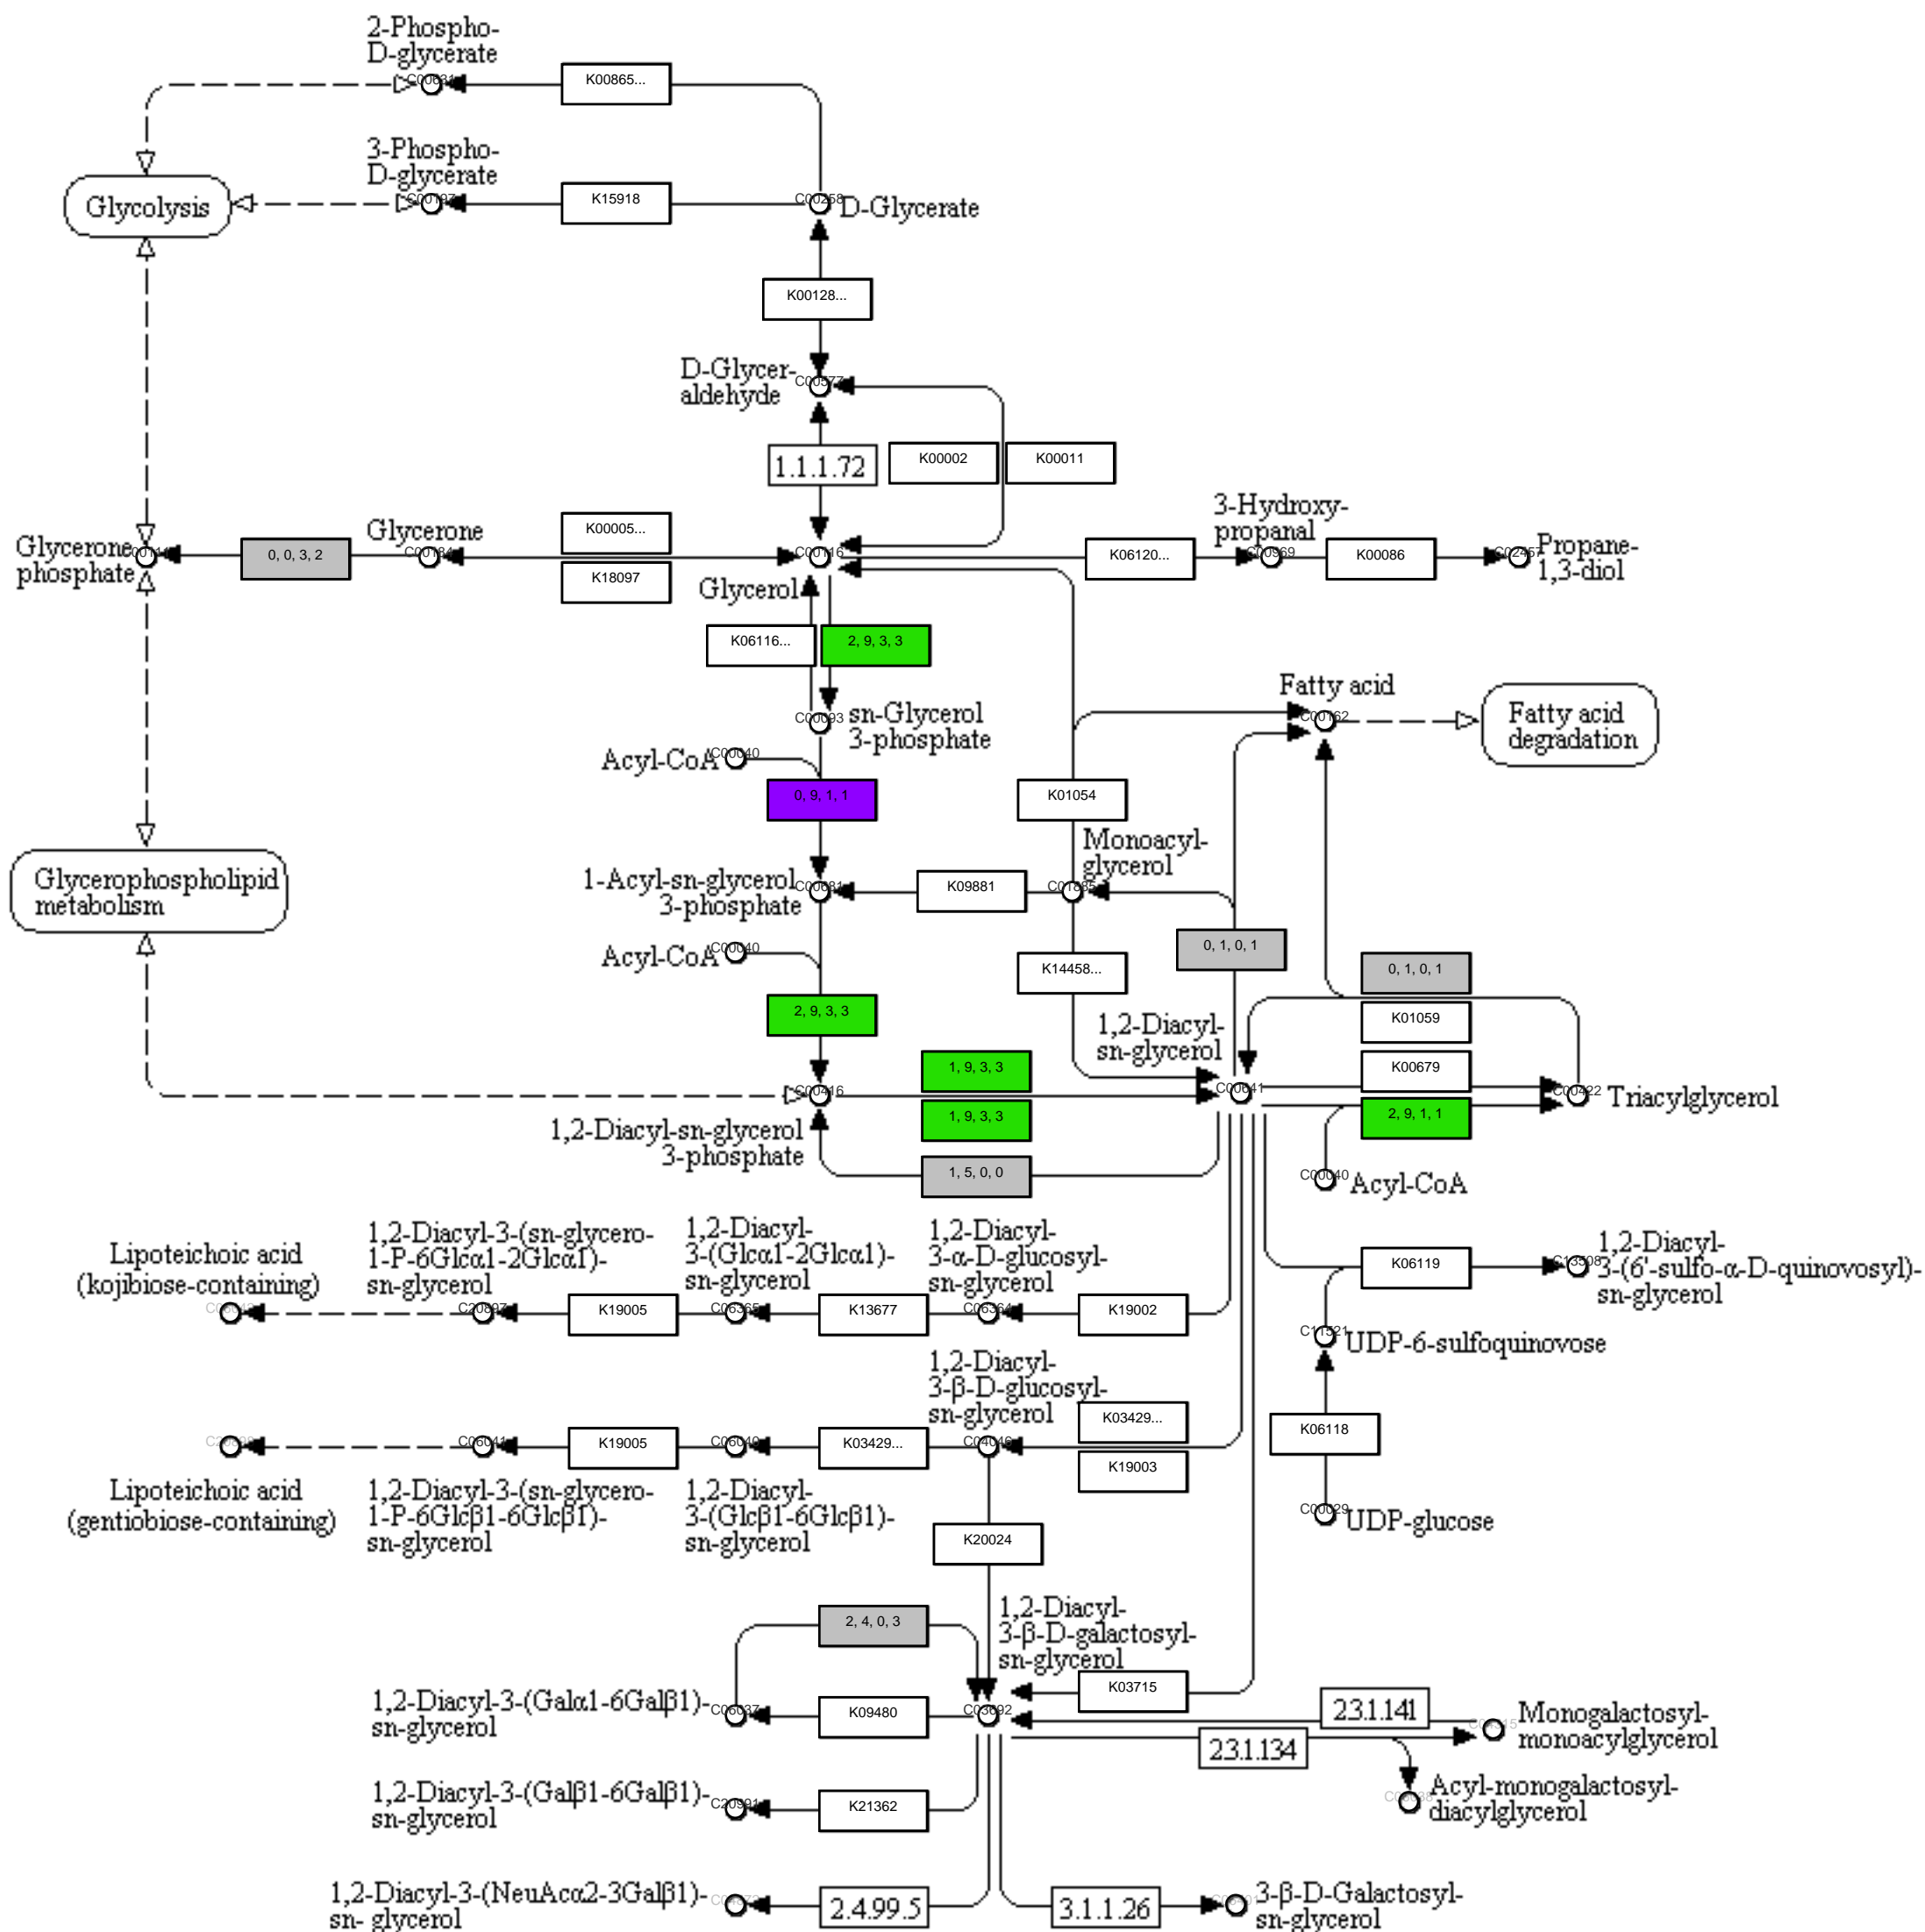





# ETHER LIPID METABOLISM

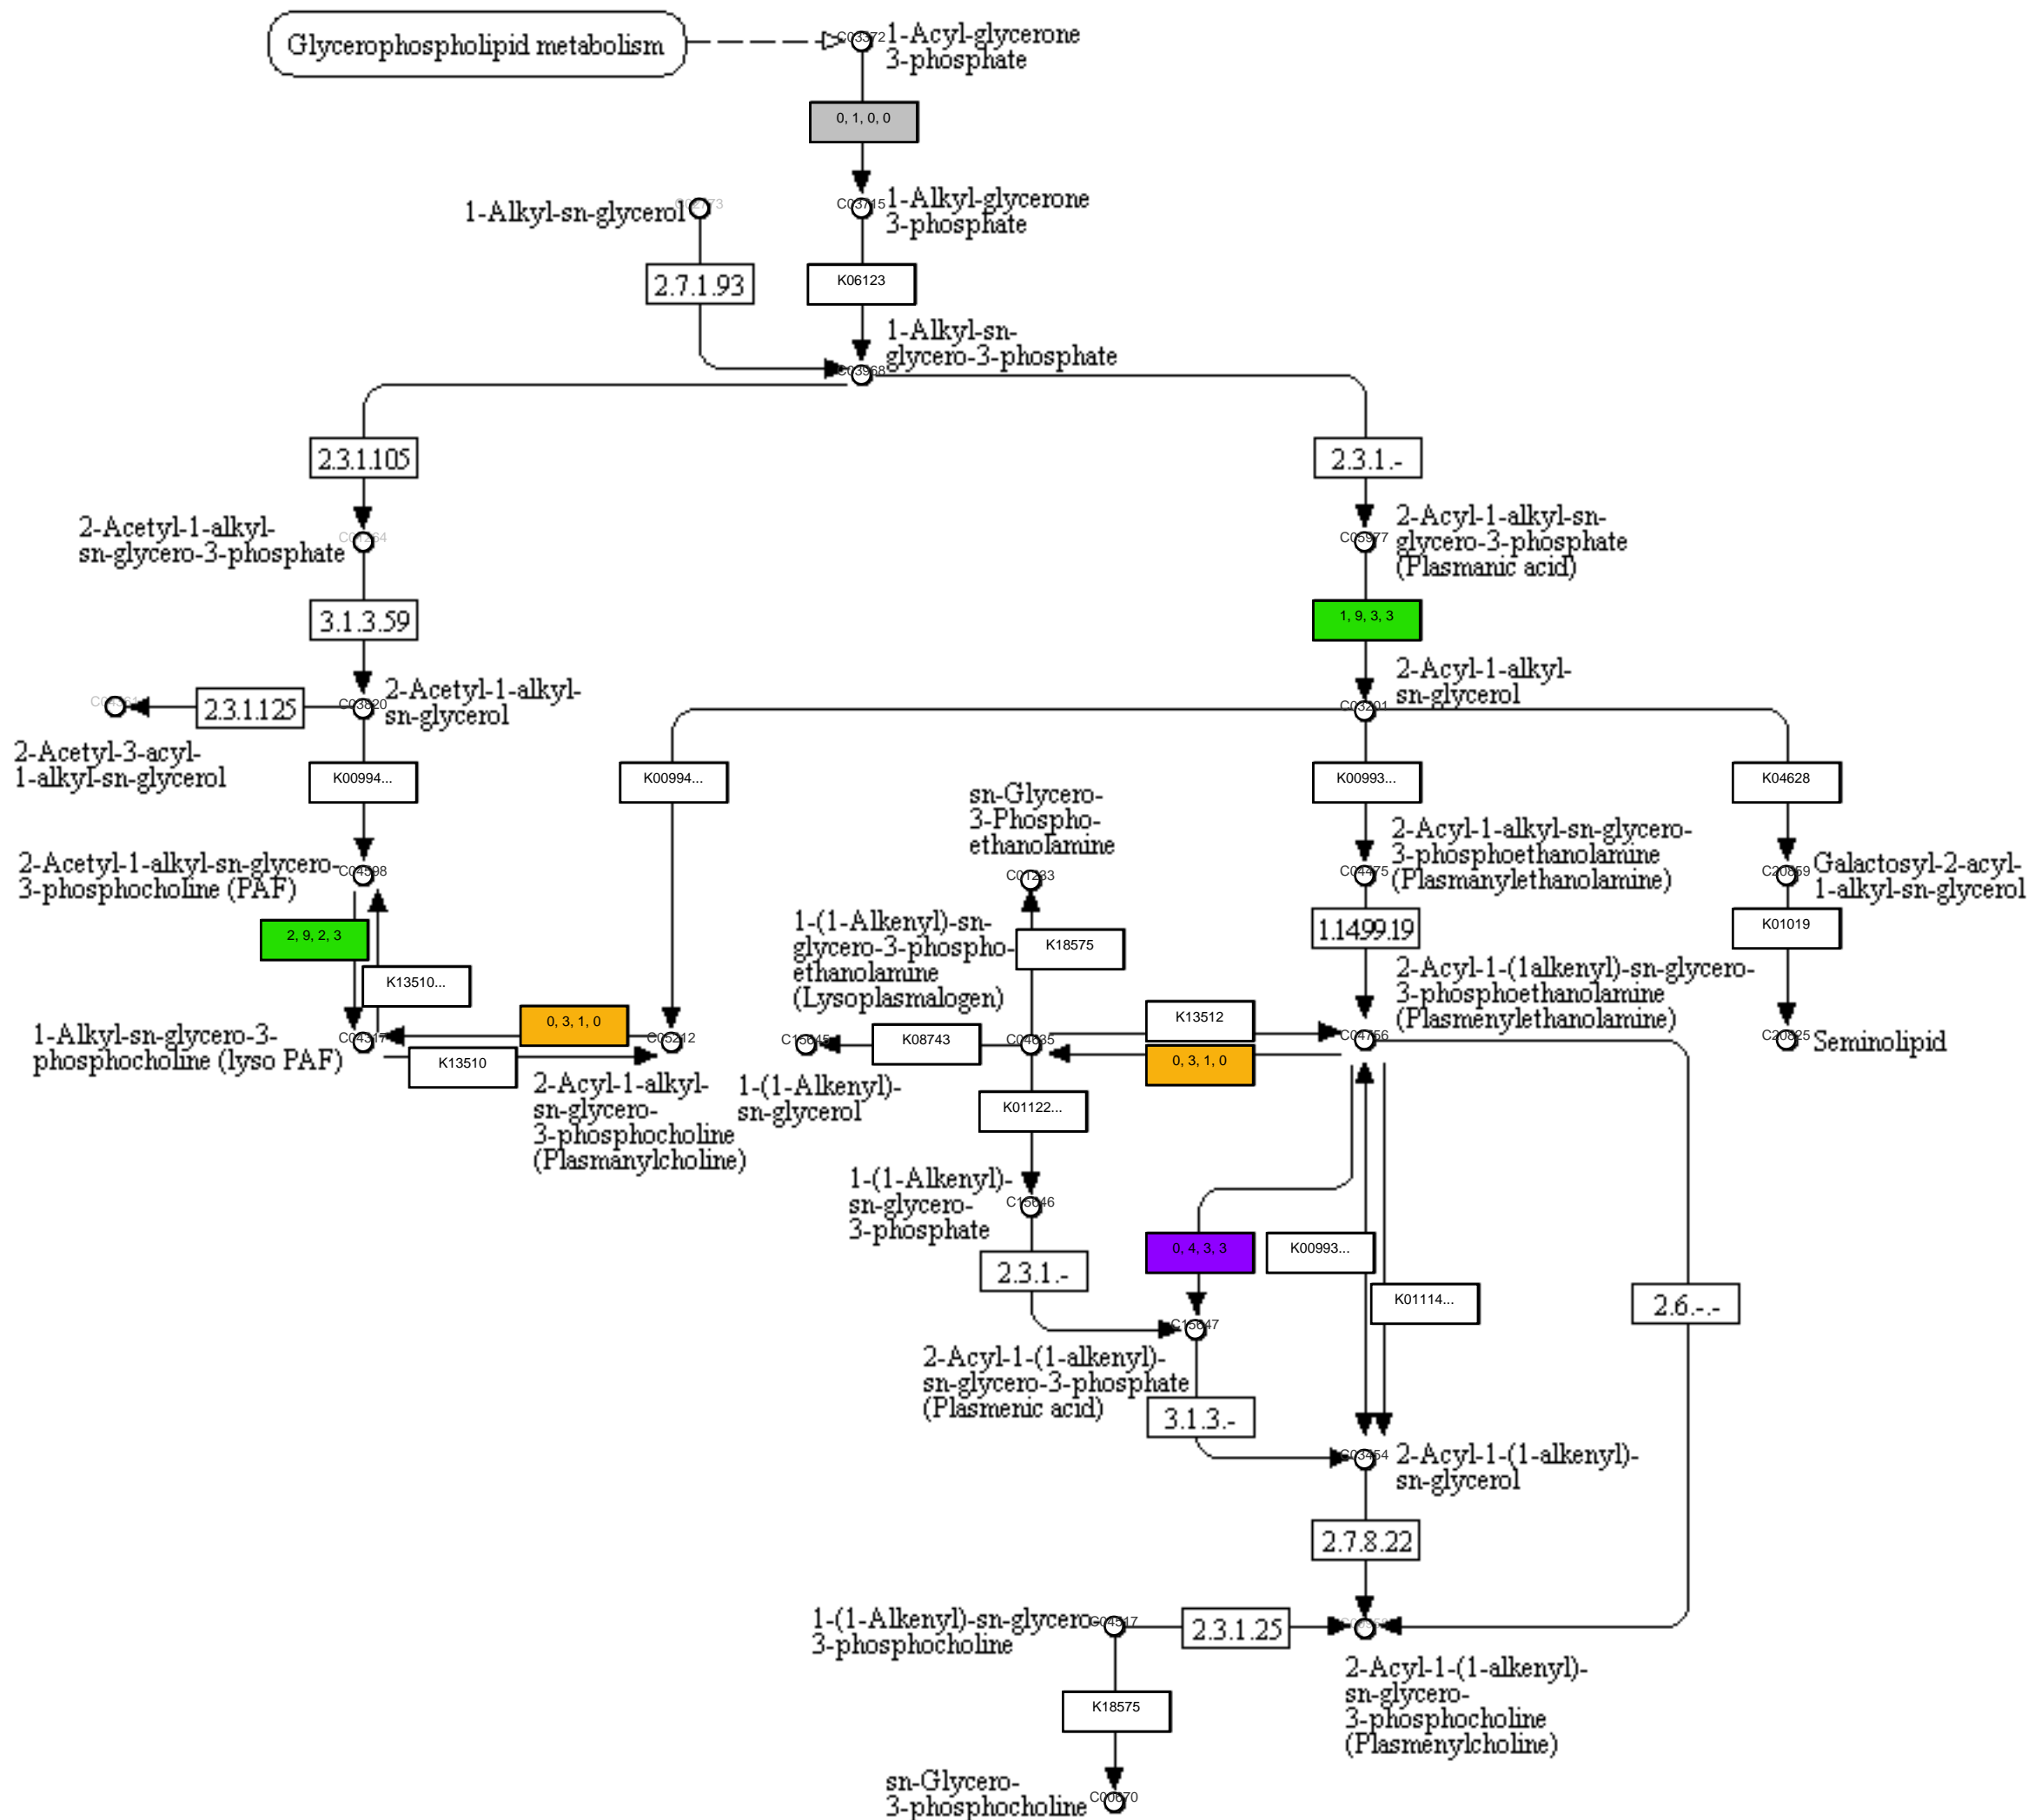









## 4. Nucleotide metabolism

| MAP        | PATHWAY               |
|------------|-----------------------|
| <b>230</b> | Purine metabolism     |
| <b>240</b> | Pyrimidine metabolism |

PURINE METABOLISM

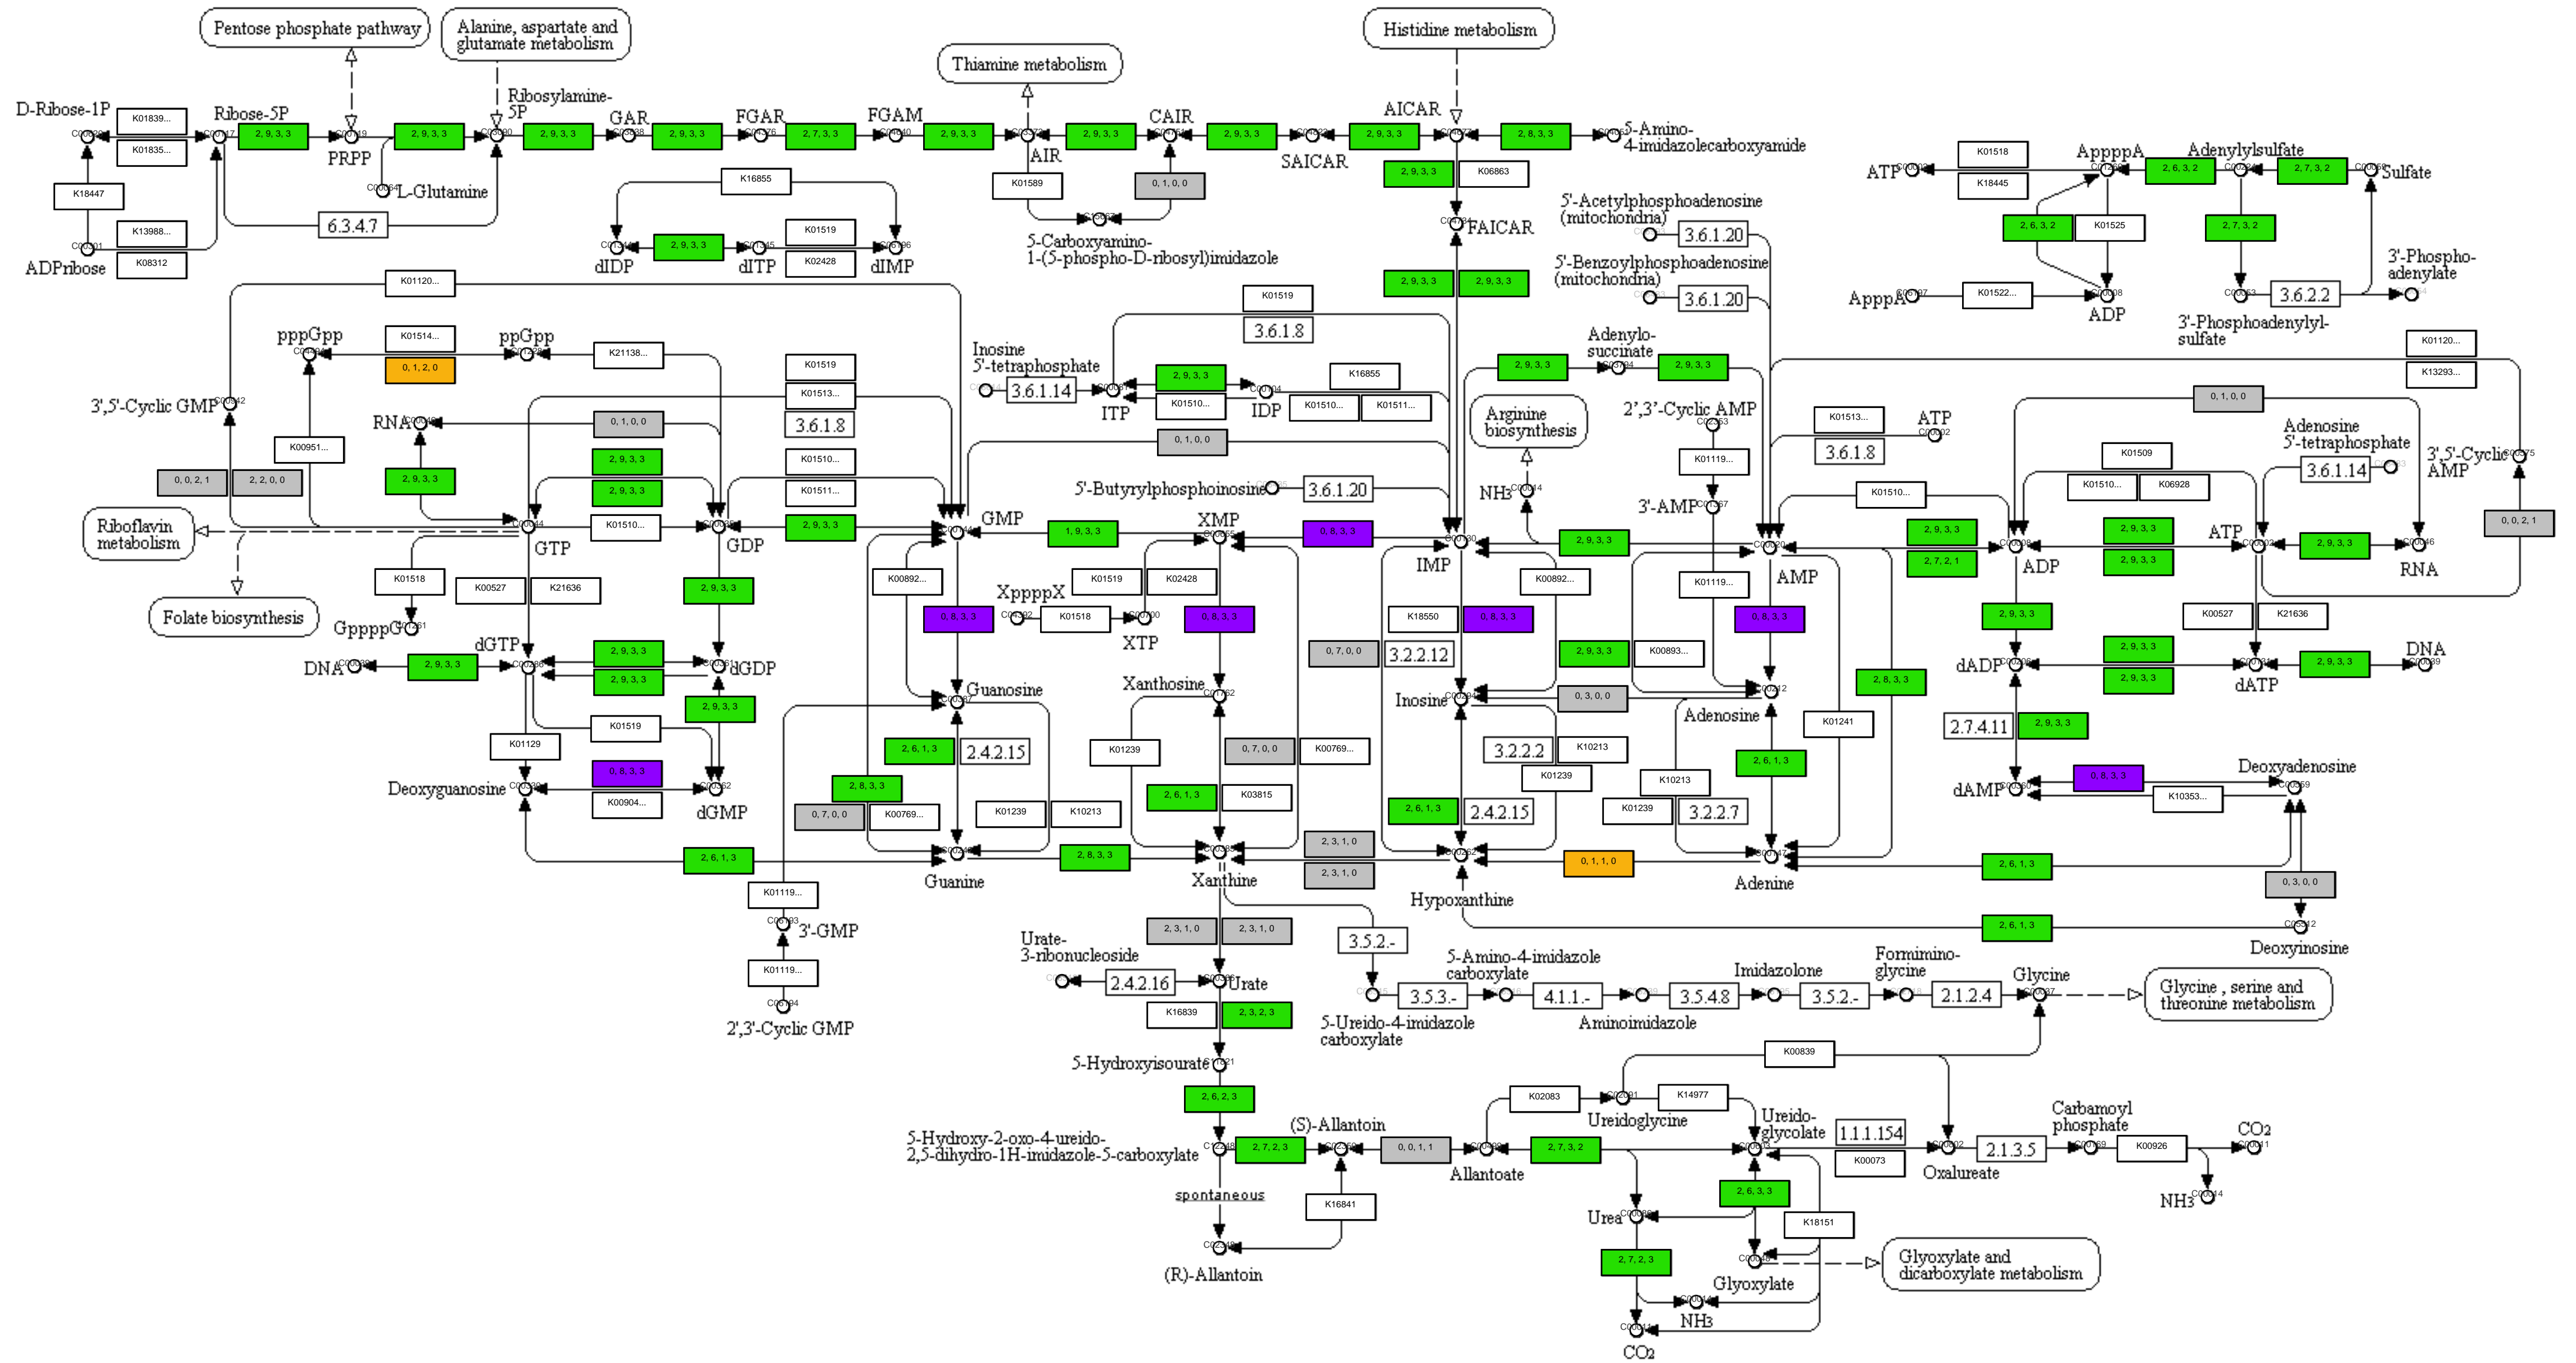

# PYRIMIDINE METABOLISM

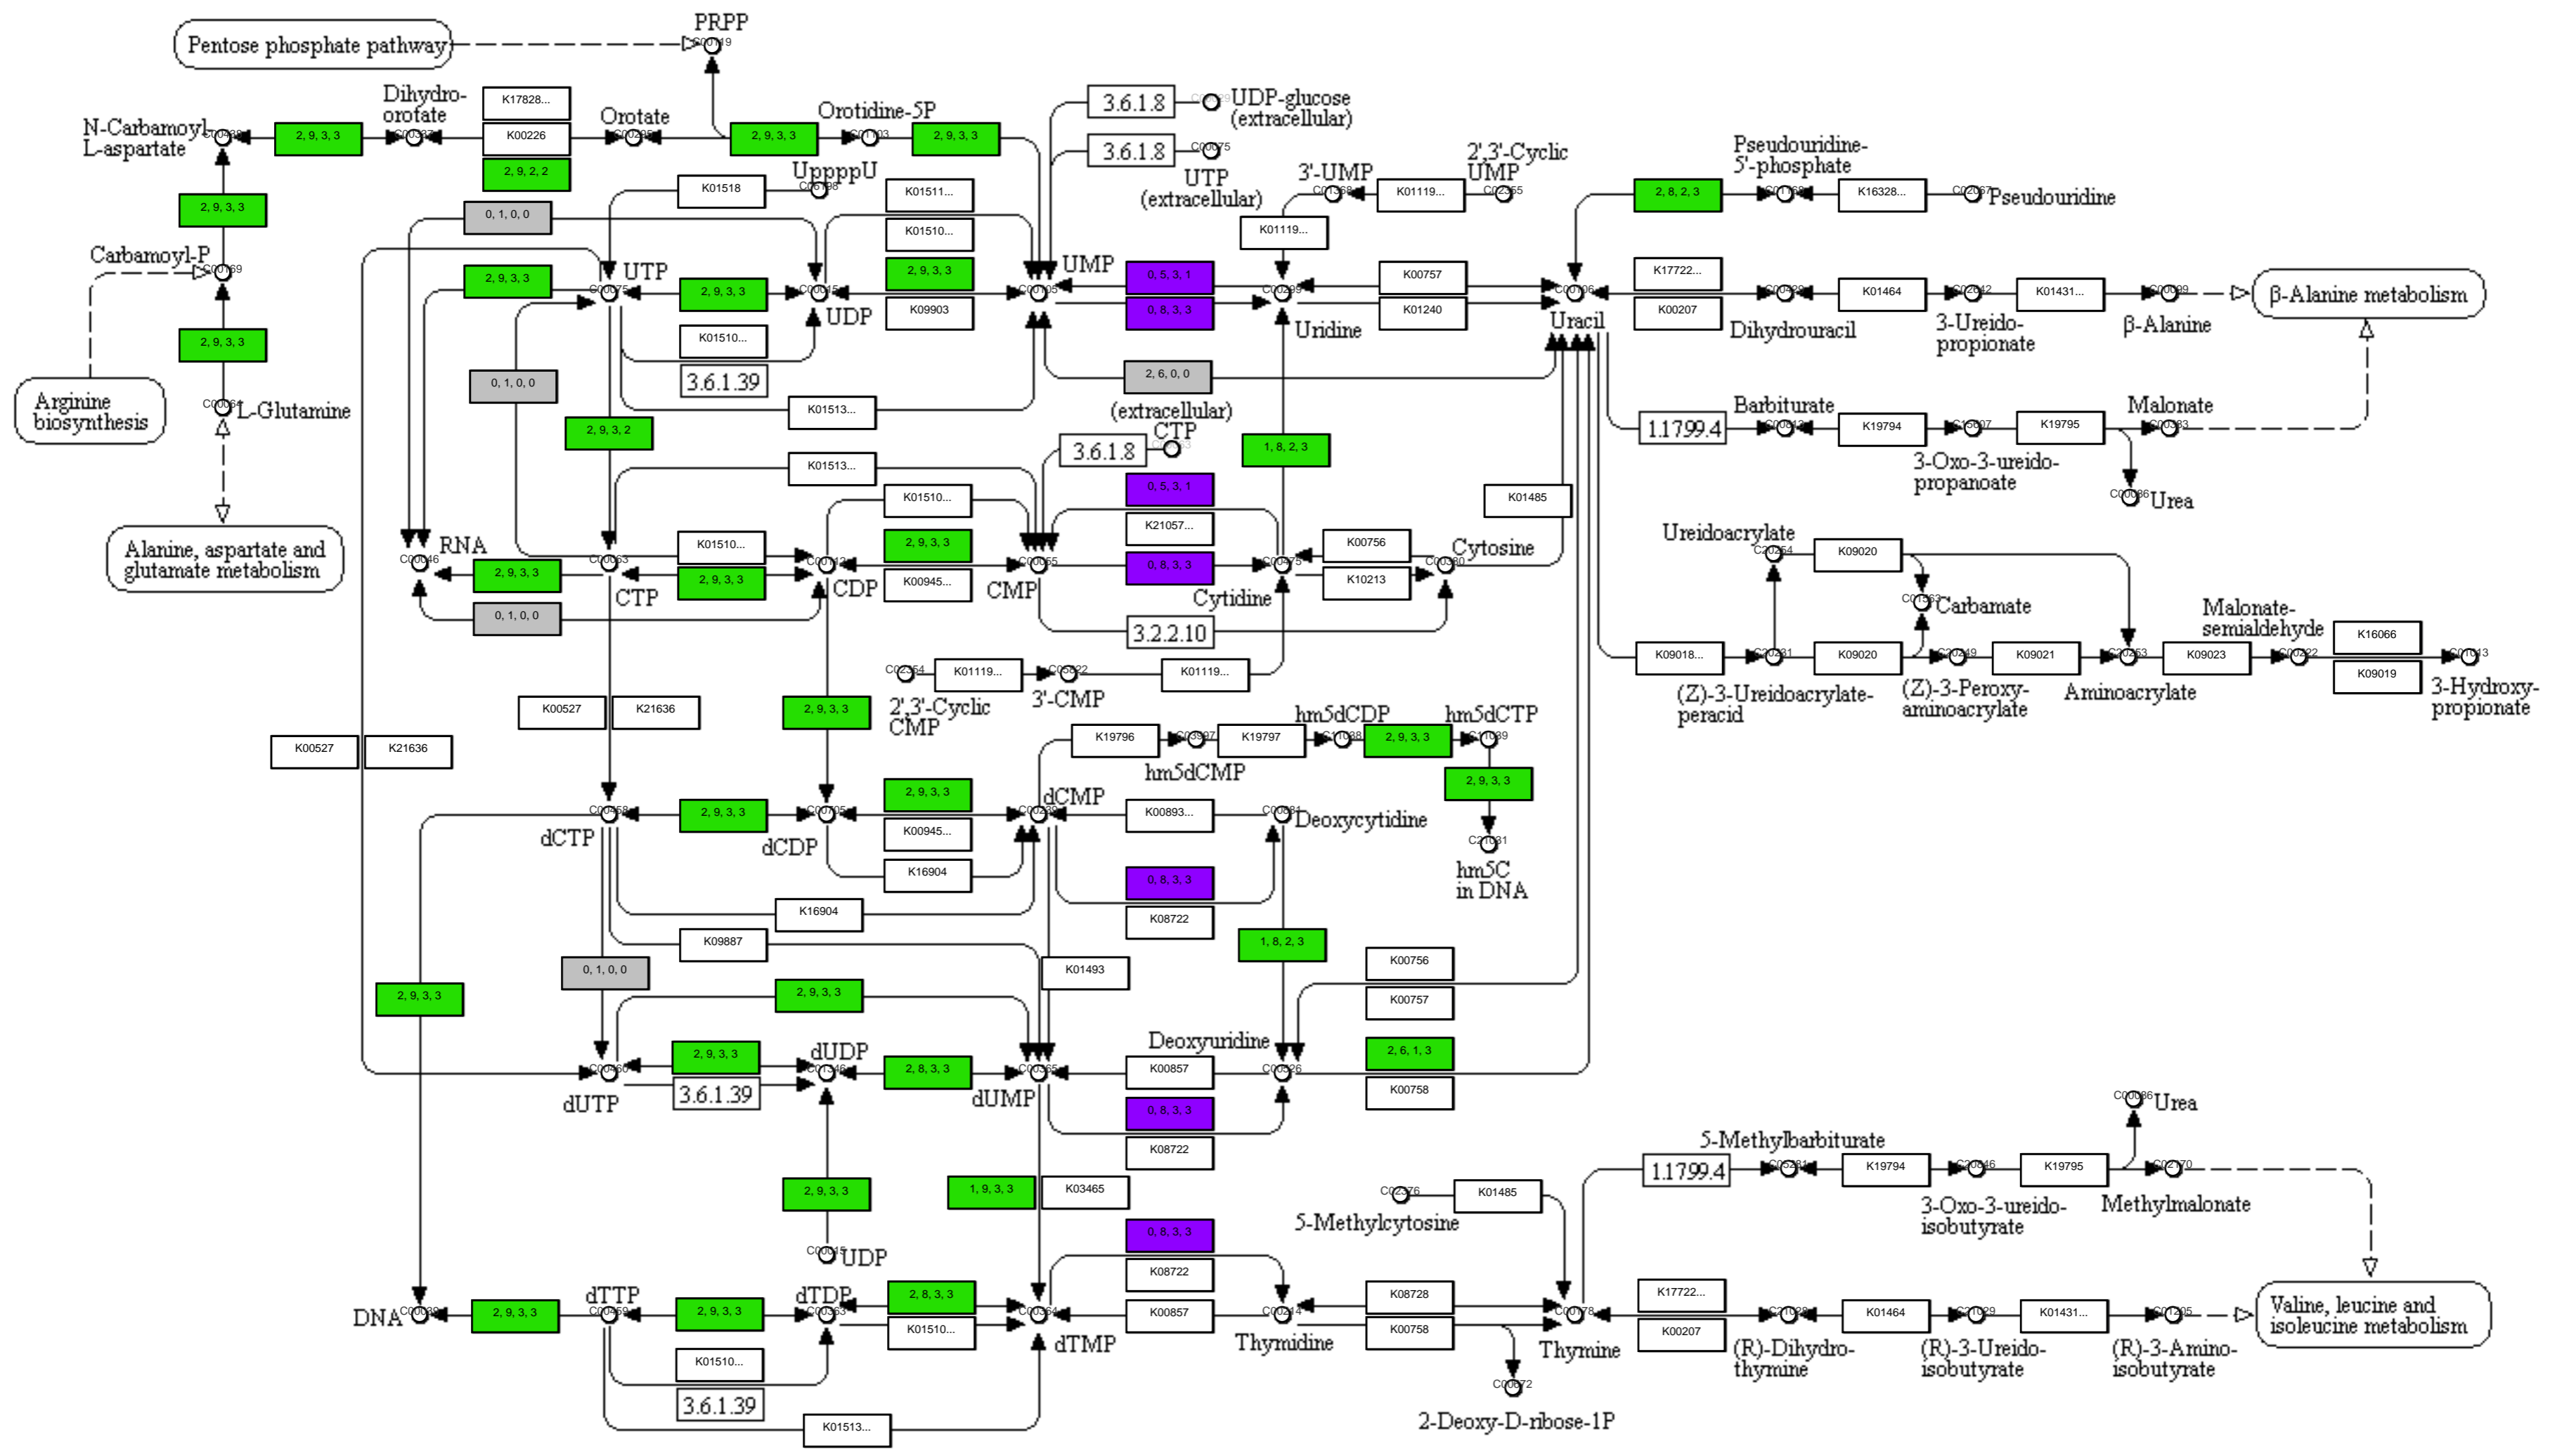

# 5. Amino Acid metabolism

| MAP | PATHWAY                                             |
|-----|-----------------------------------------------------|
| 220 | Arginine biosynthesis                               |
| 250 | Alanine, aspartate and glutamate metabolism         |
| 260 | Glycine, serine and threonine metabolism            |
| 270 | Cysteine and methionine metabolism                  |
| 280 | Valine, leucine and isoleucine degradation          |
| 290 | Valine, leucine and isoleucine biosynthesis         |
| 300 | Lysine biosynthesis                                 |
| 310 | Lysine degradation                                  |
| 330 | Arginine and proline metabolism                     |
| 340 | Histidine metabolism                                |
| 350 | Tyrosine metabolism                                 |
| 360 | Phenylalanine metabolism                            |
| 380 | Tryptophan metabolism                               |
| 400 | Phenylalanine, tyrosine and tryptophan biosynthesis |



# ARGININE BIOSYNTHESIS

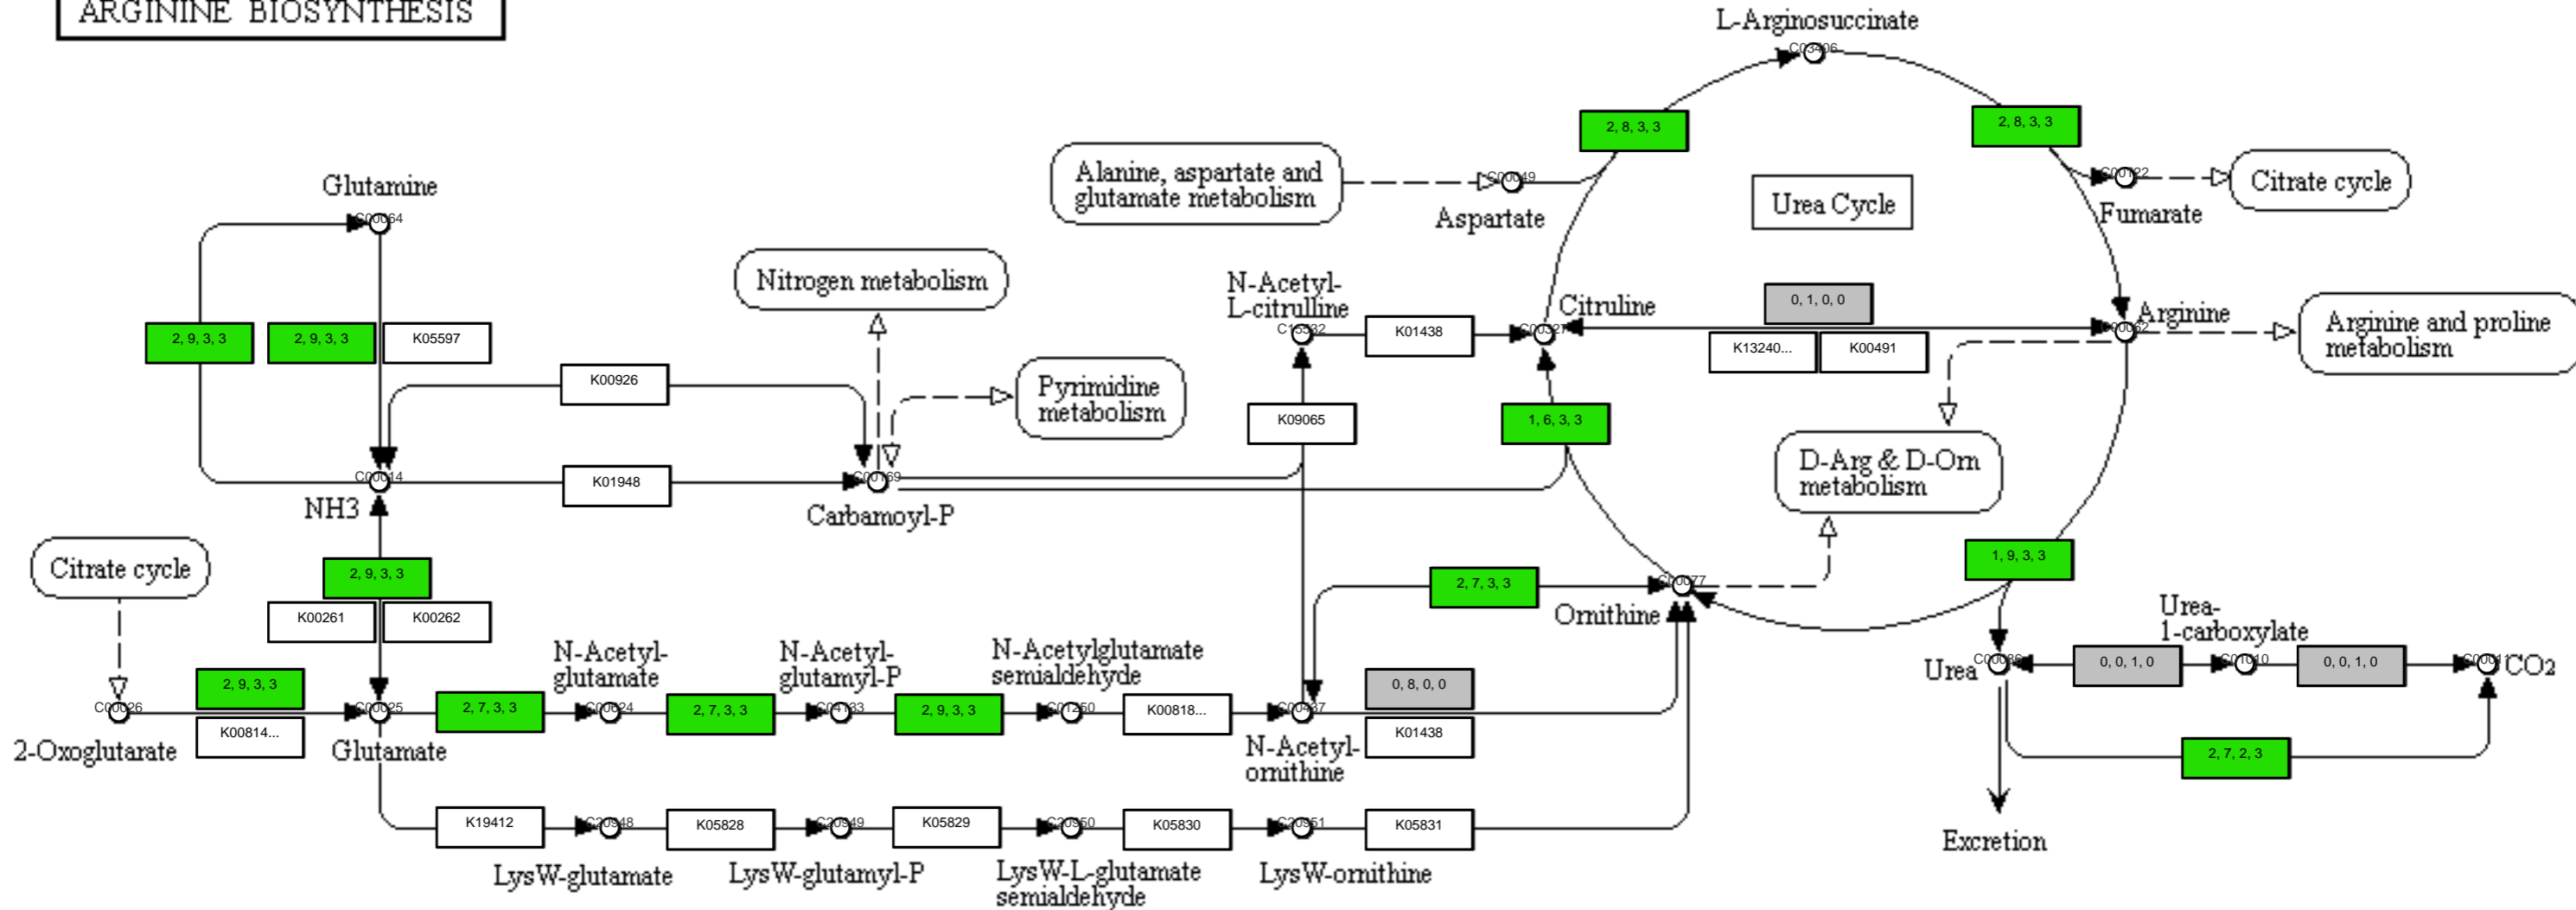





GLYCINE, SERINE AND THREONINE METABOLISM

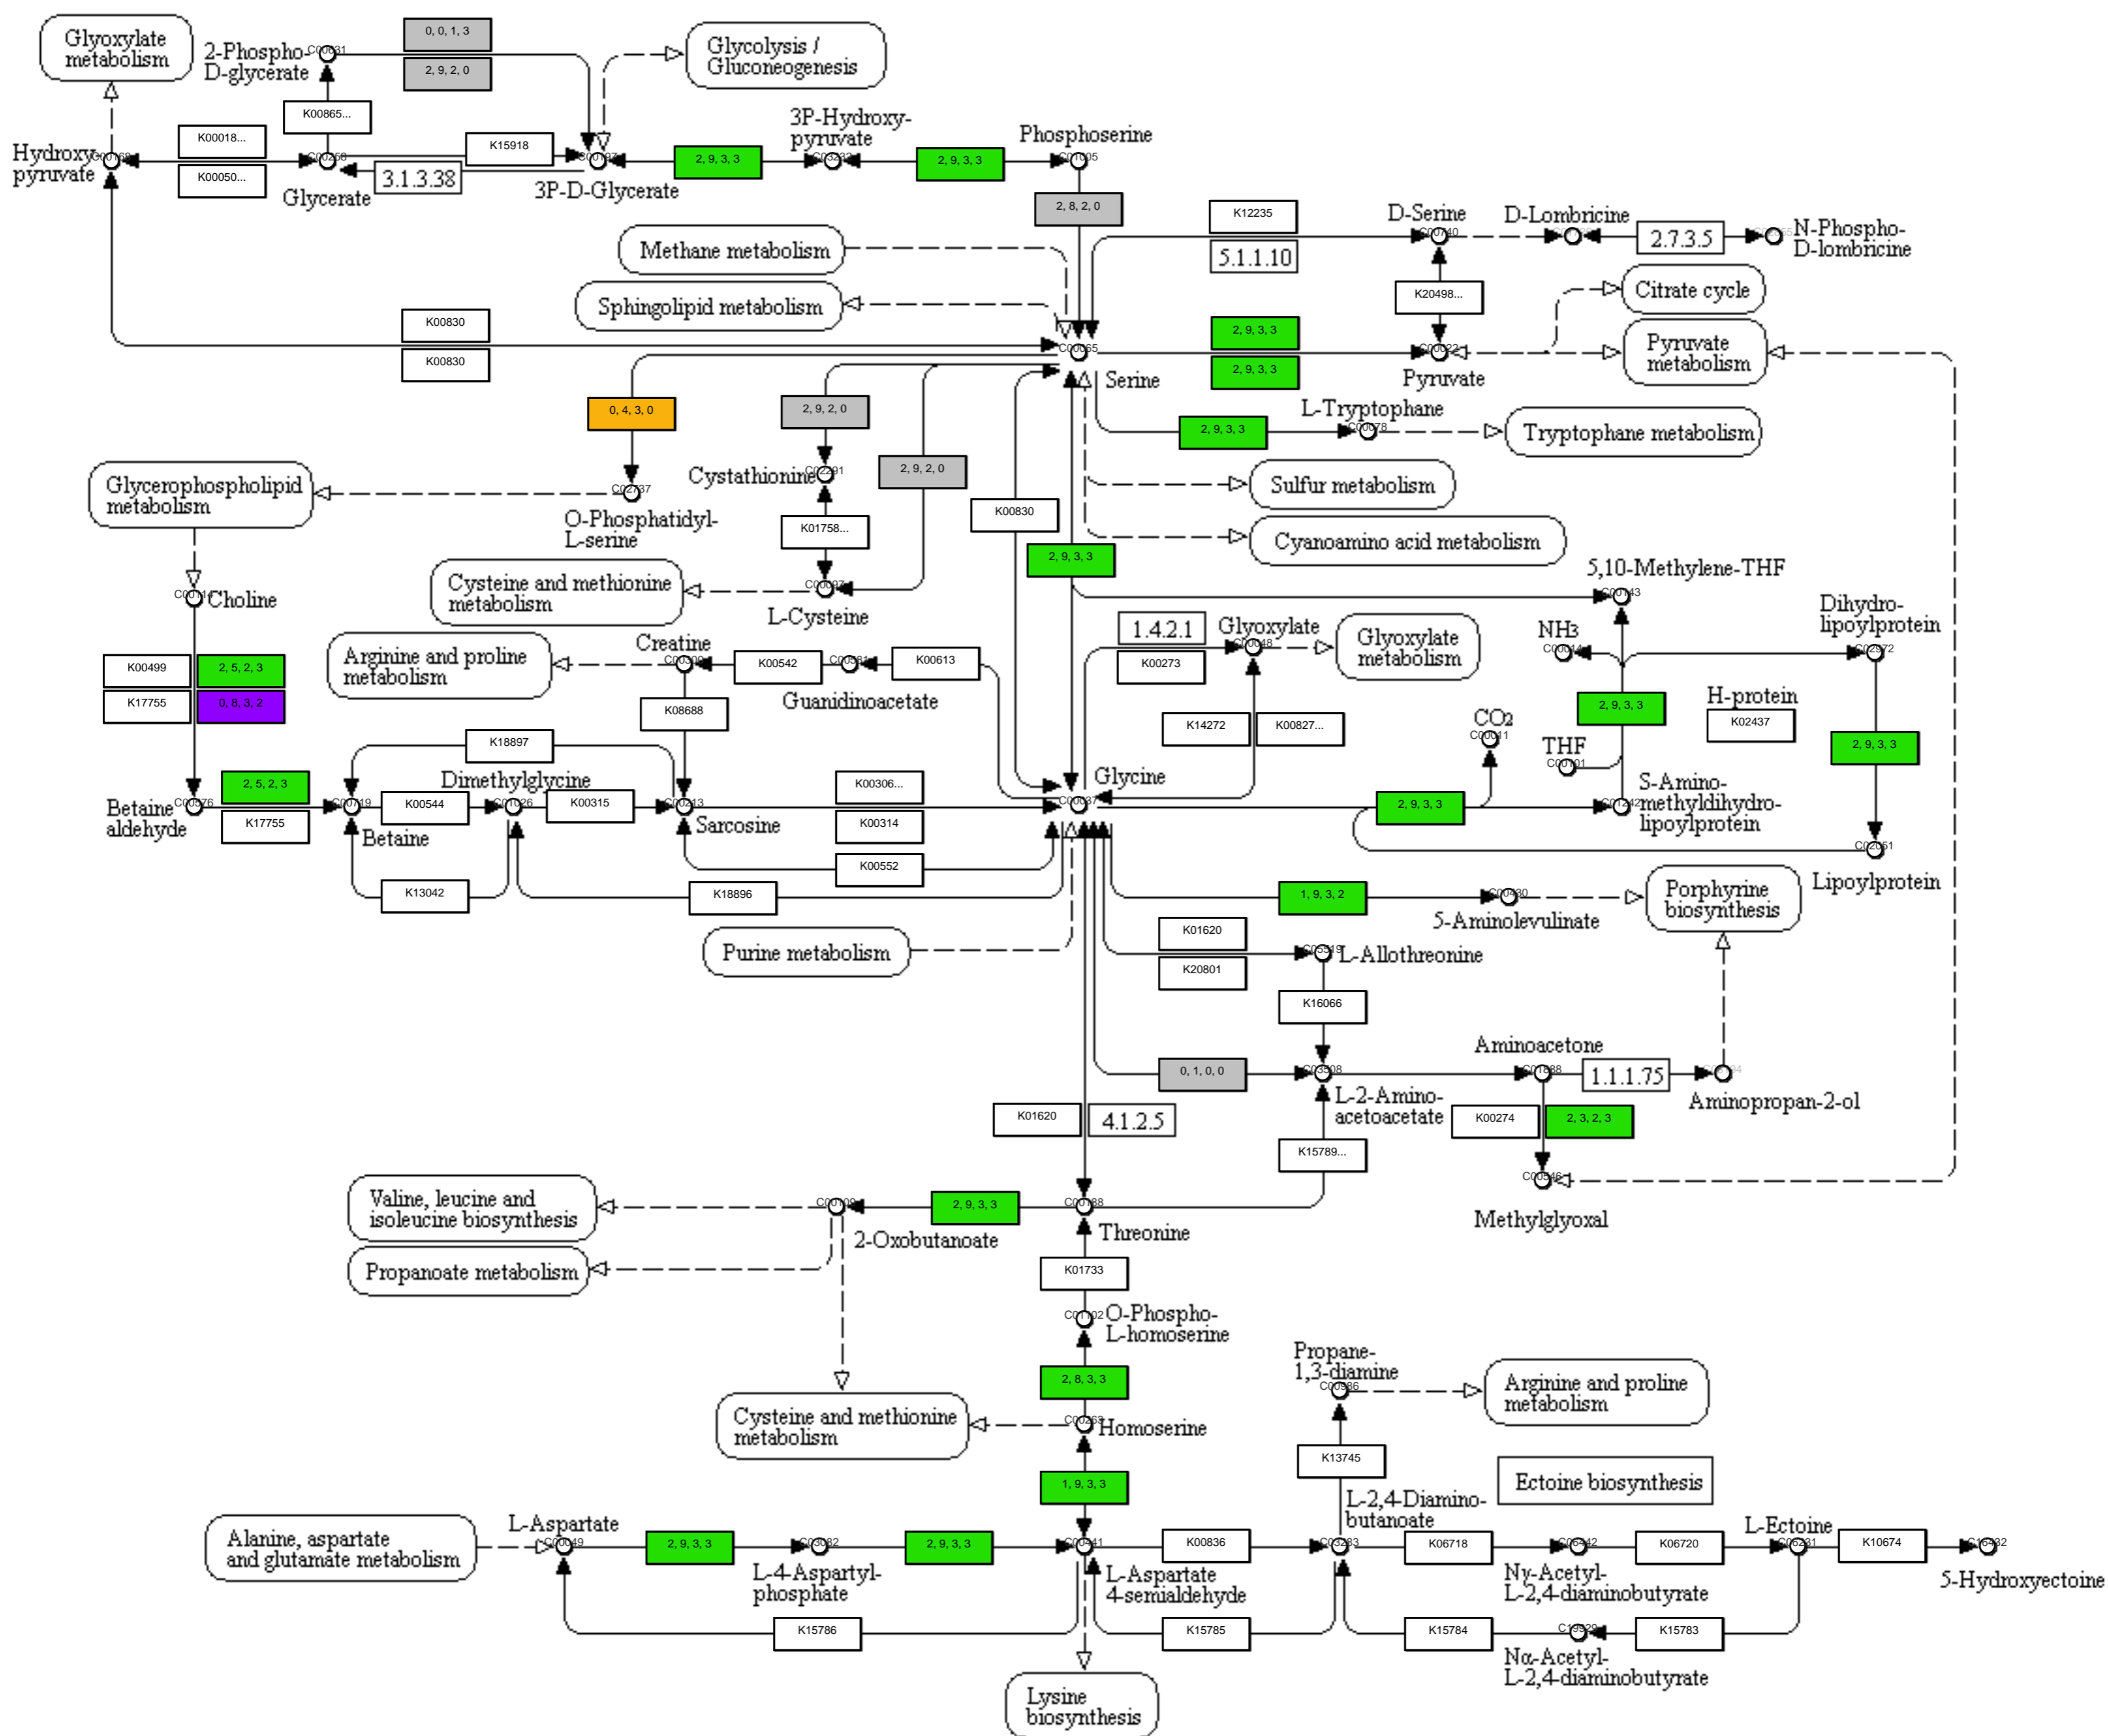



# VALINE, LEUCINE AND ISOLEUCINE DEGRADATION

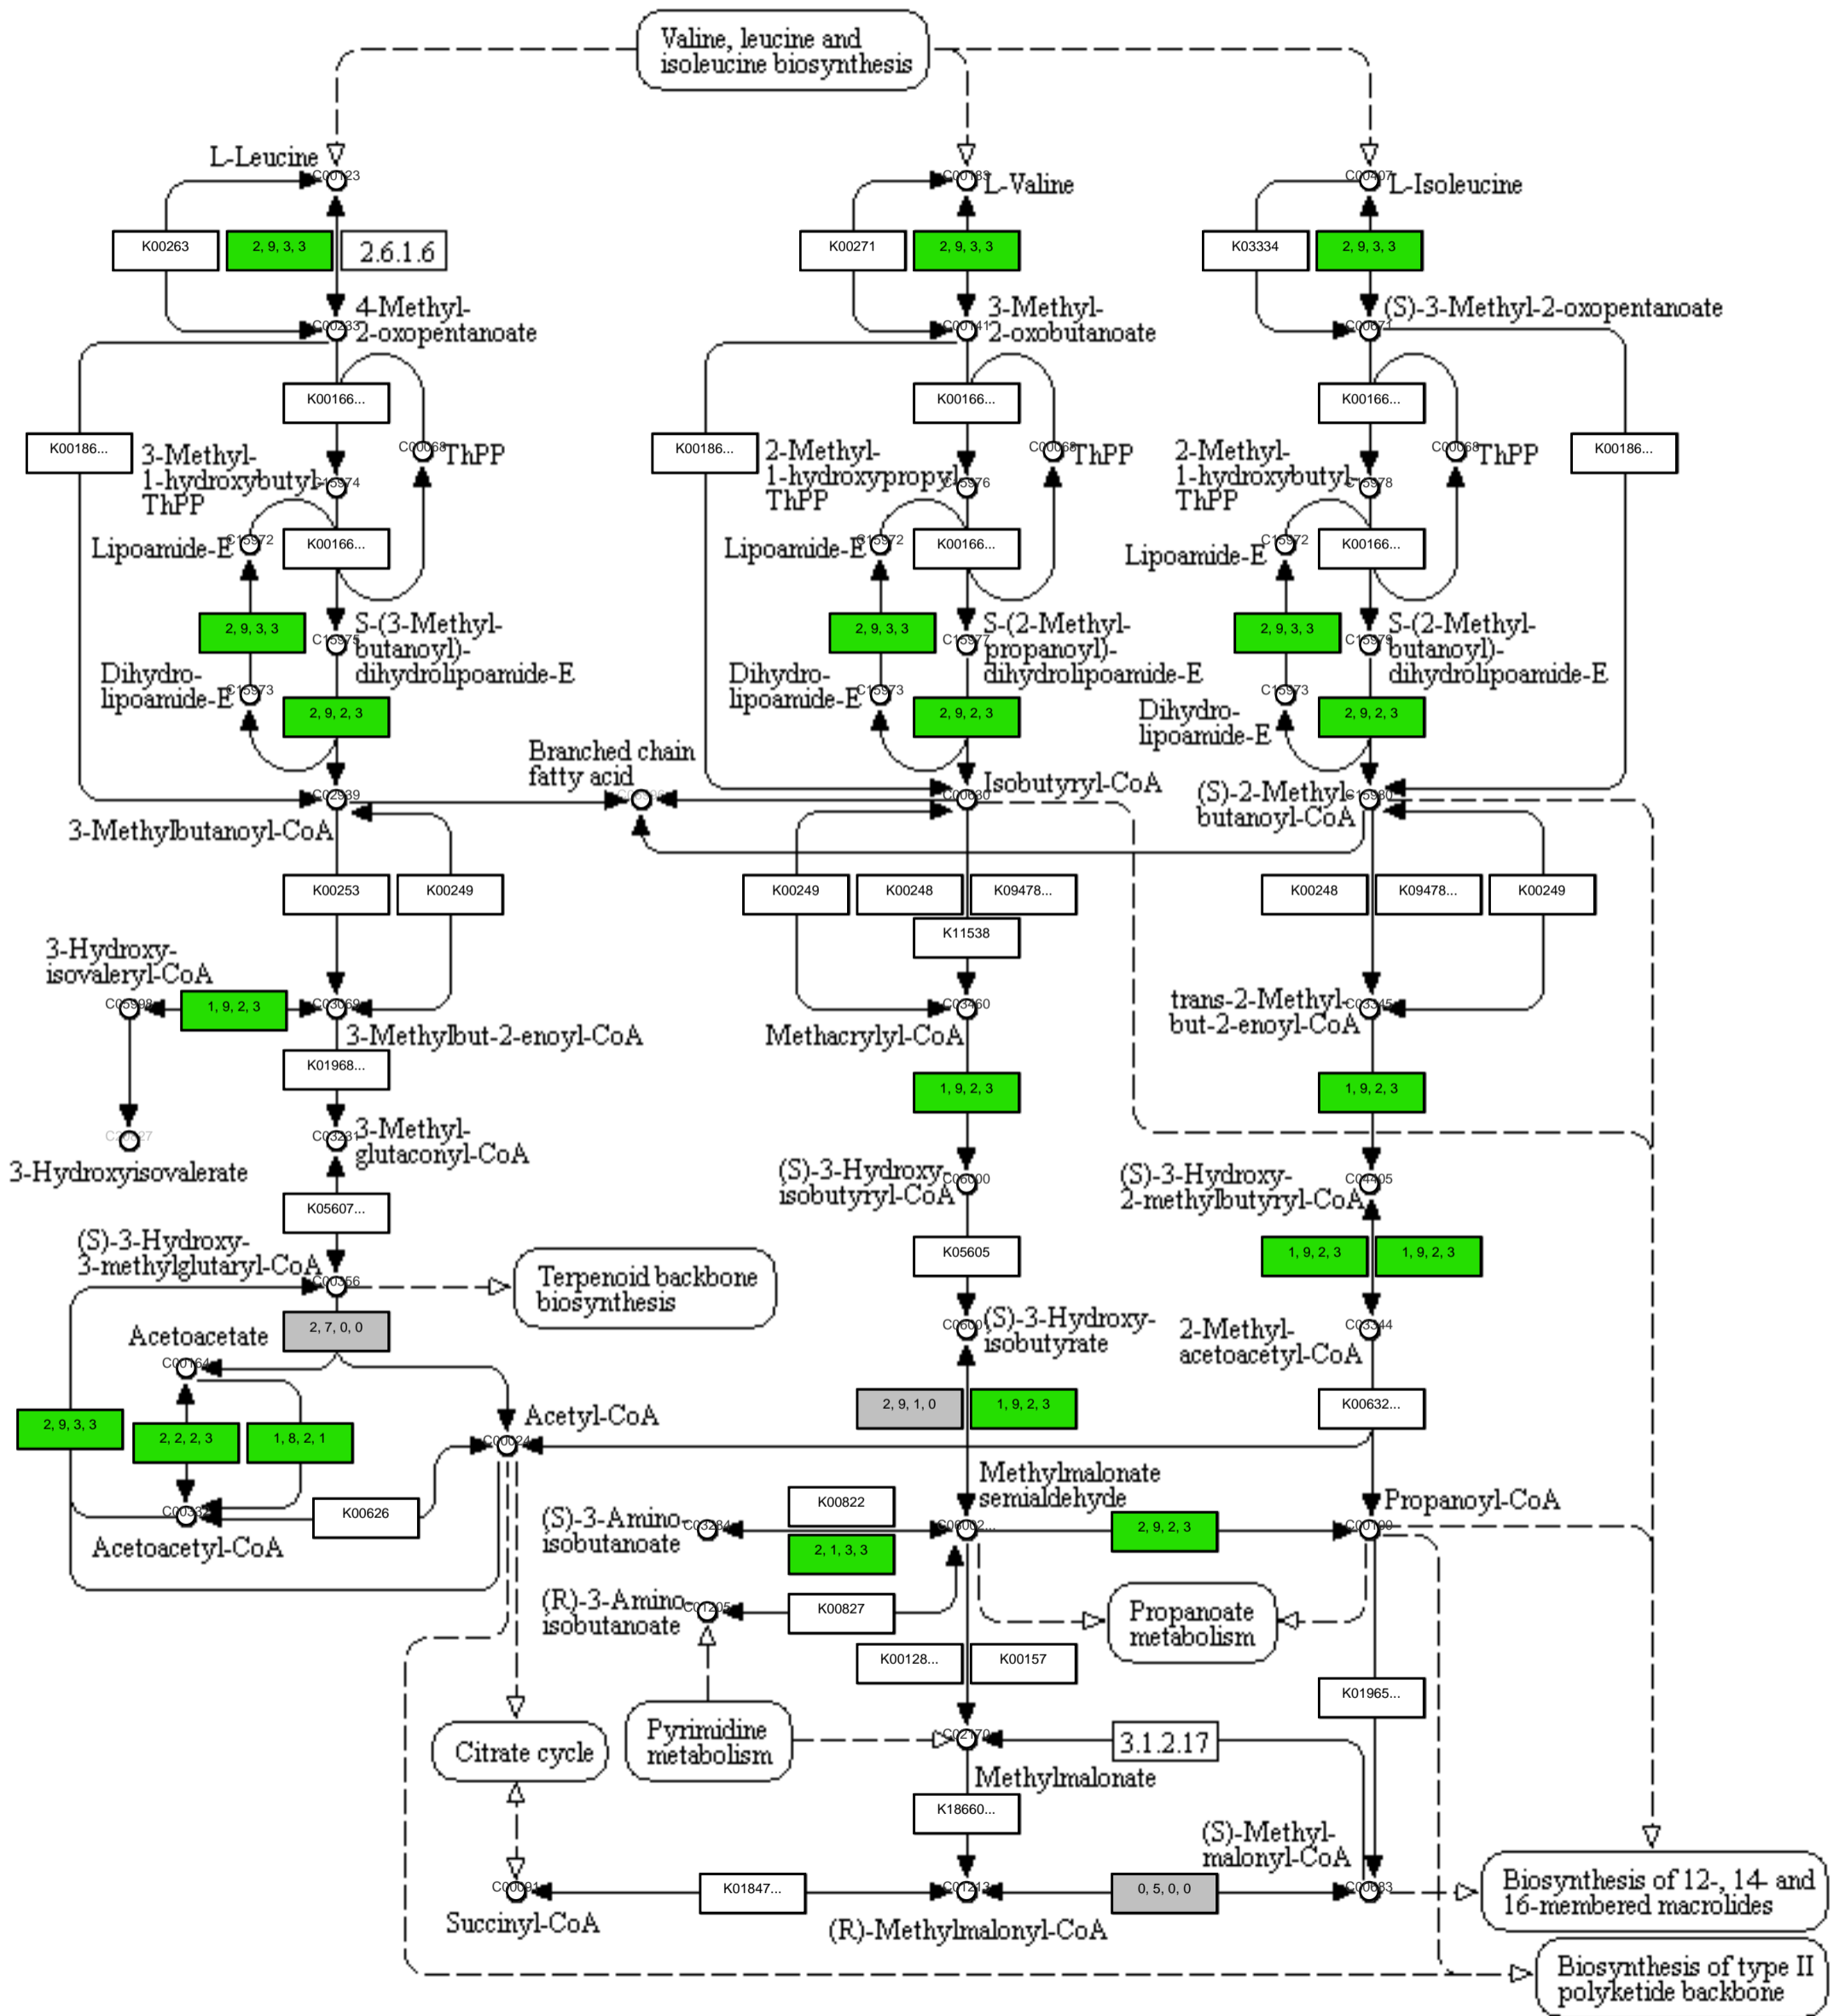





# LYSINE BIOSYNTHESIS

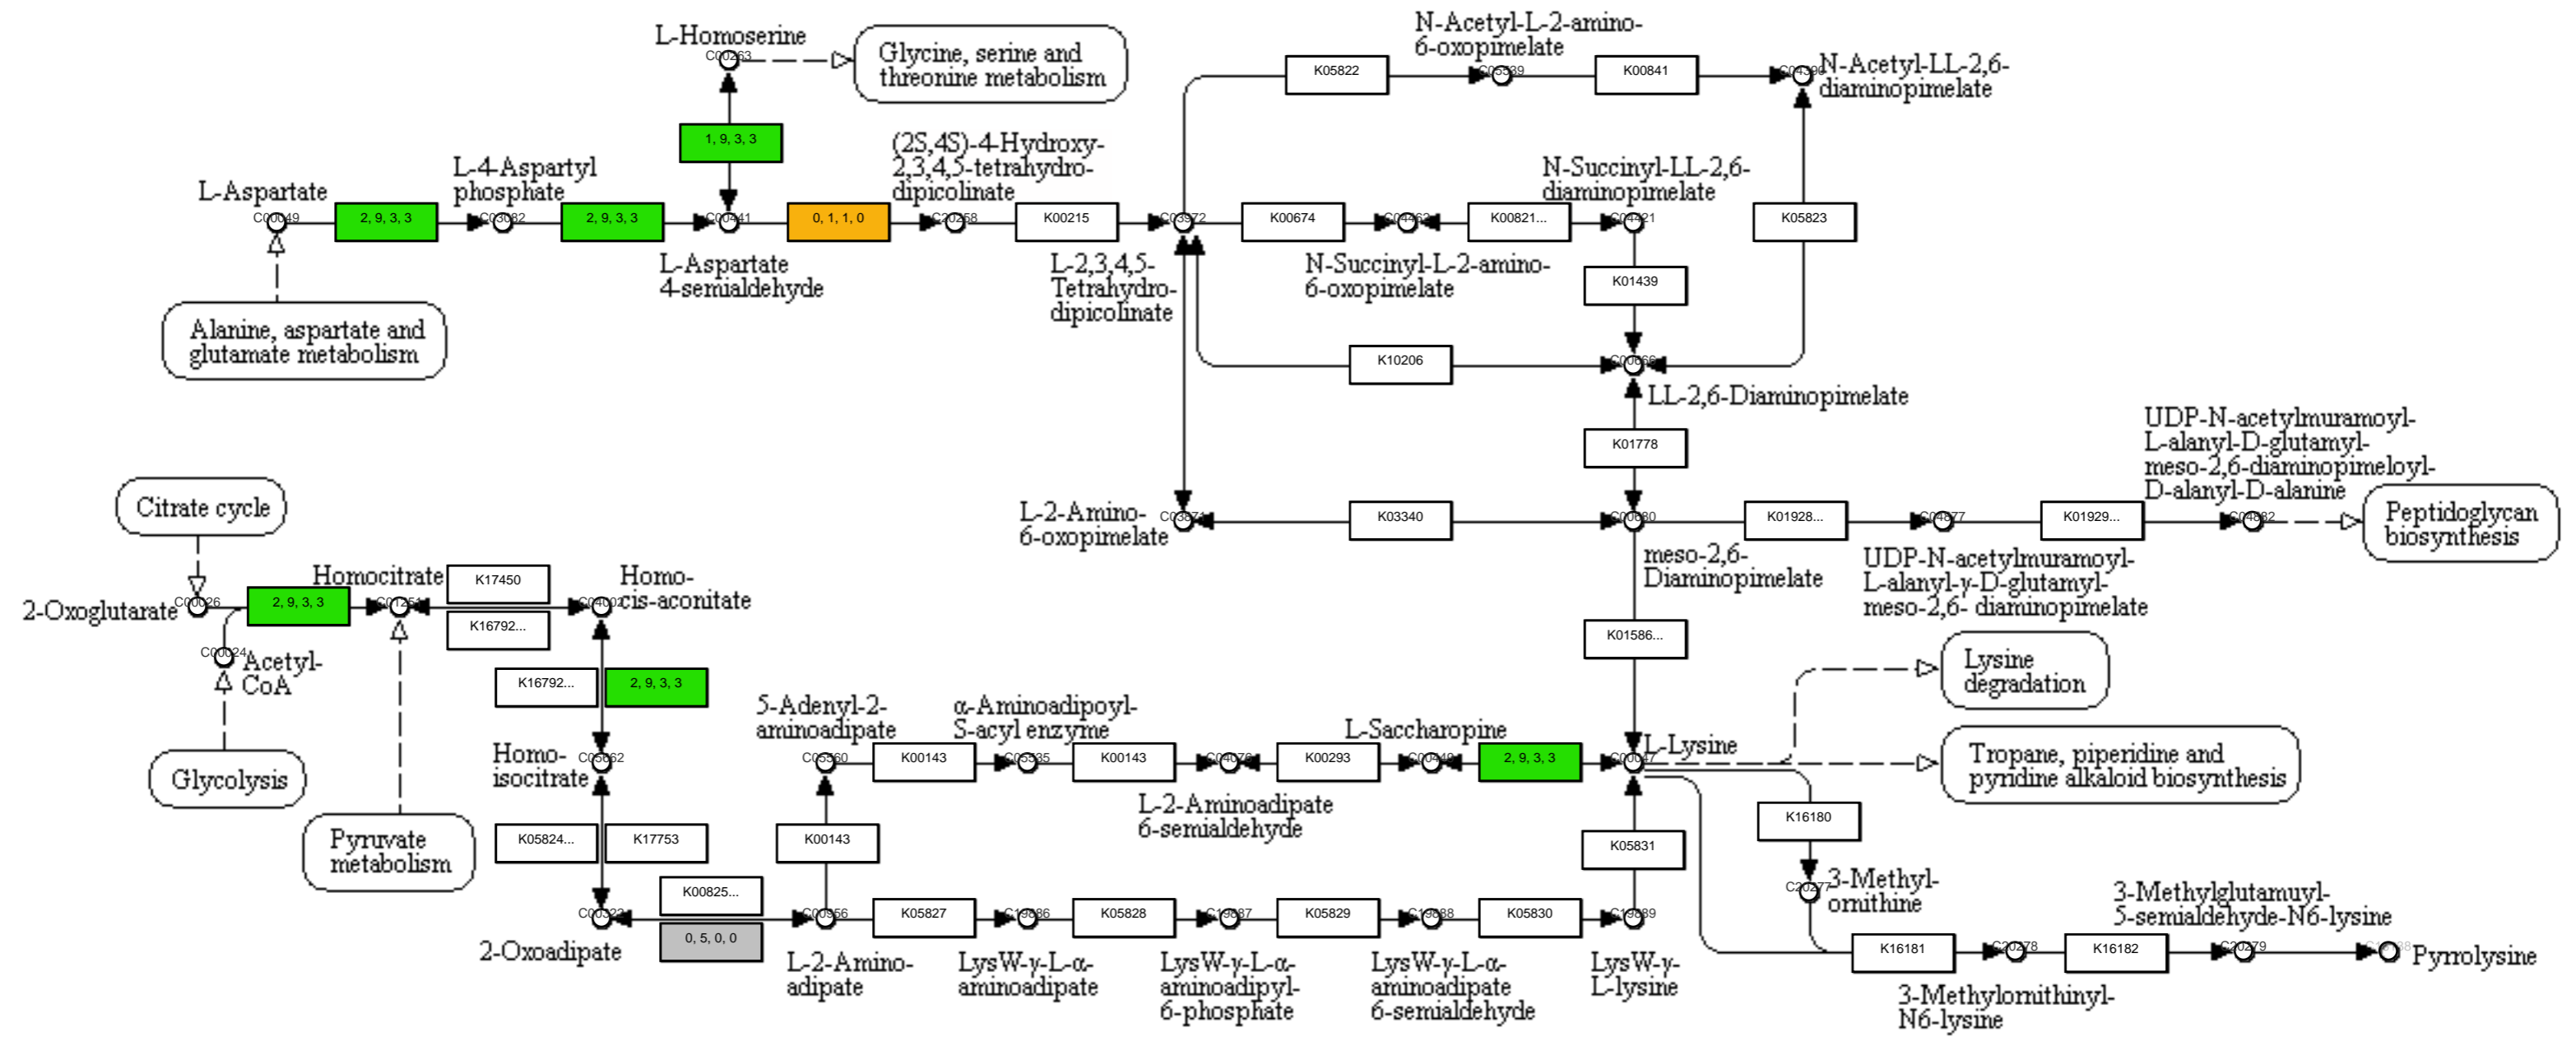



LYSINE DEGRADATION

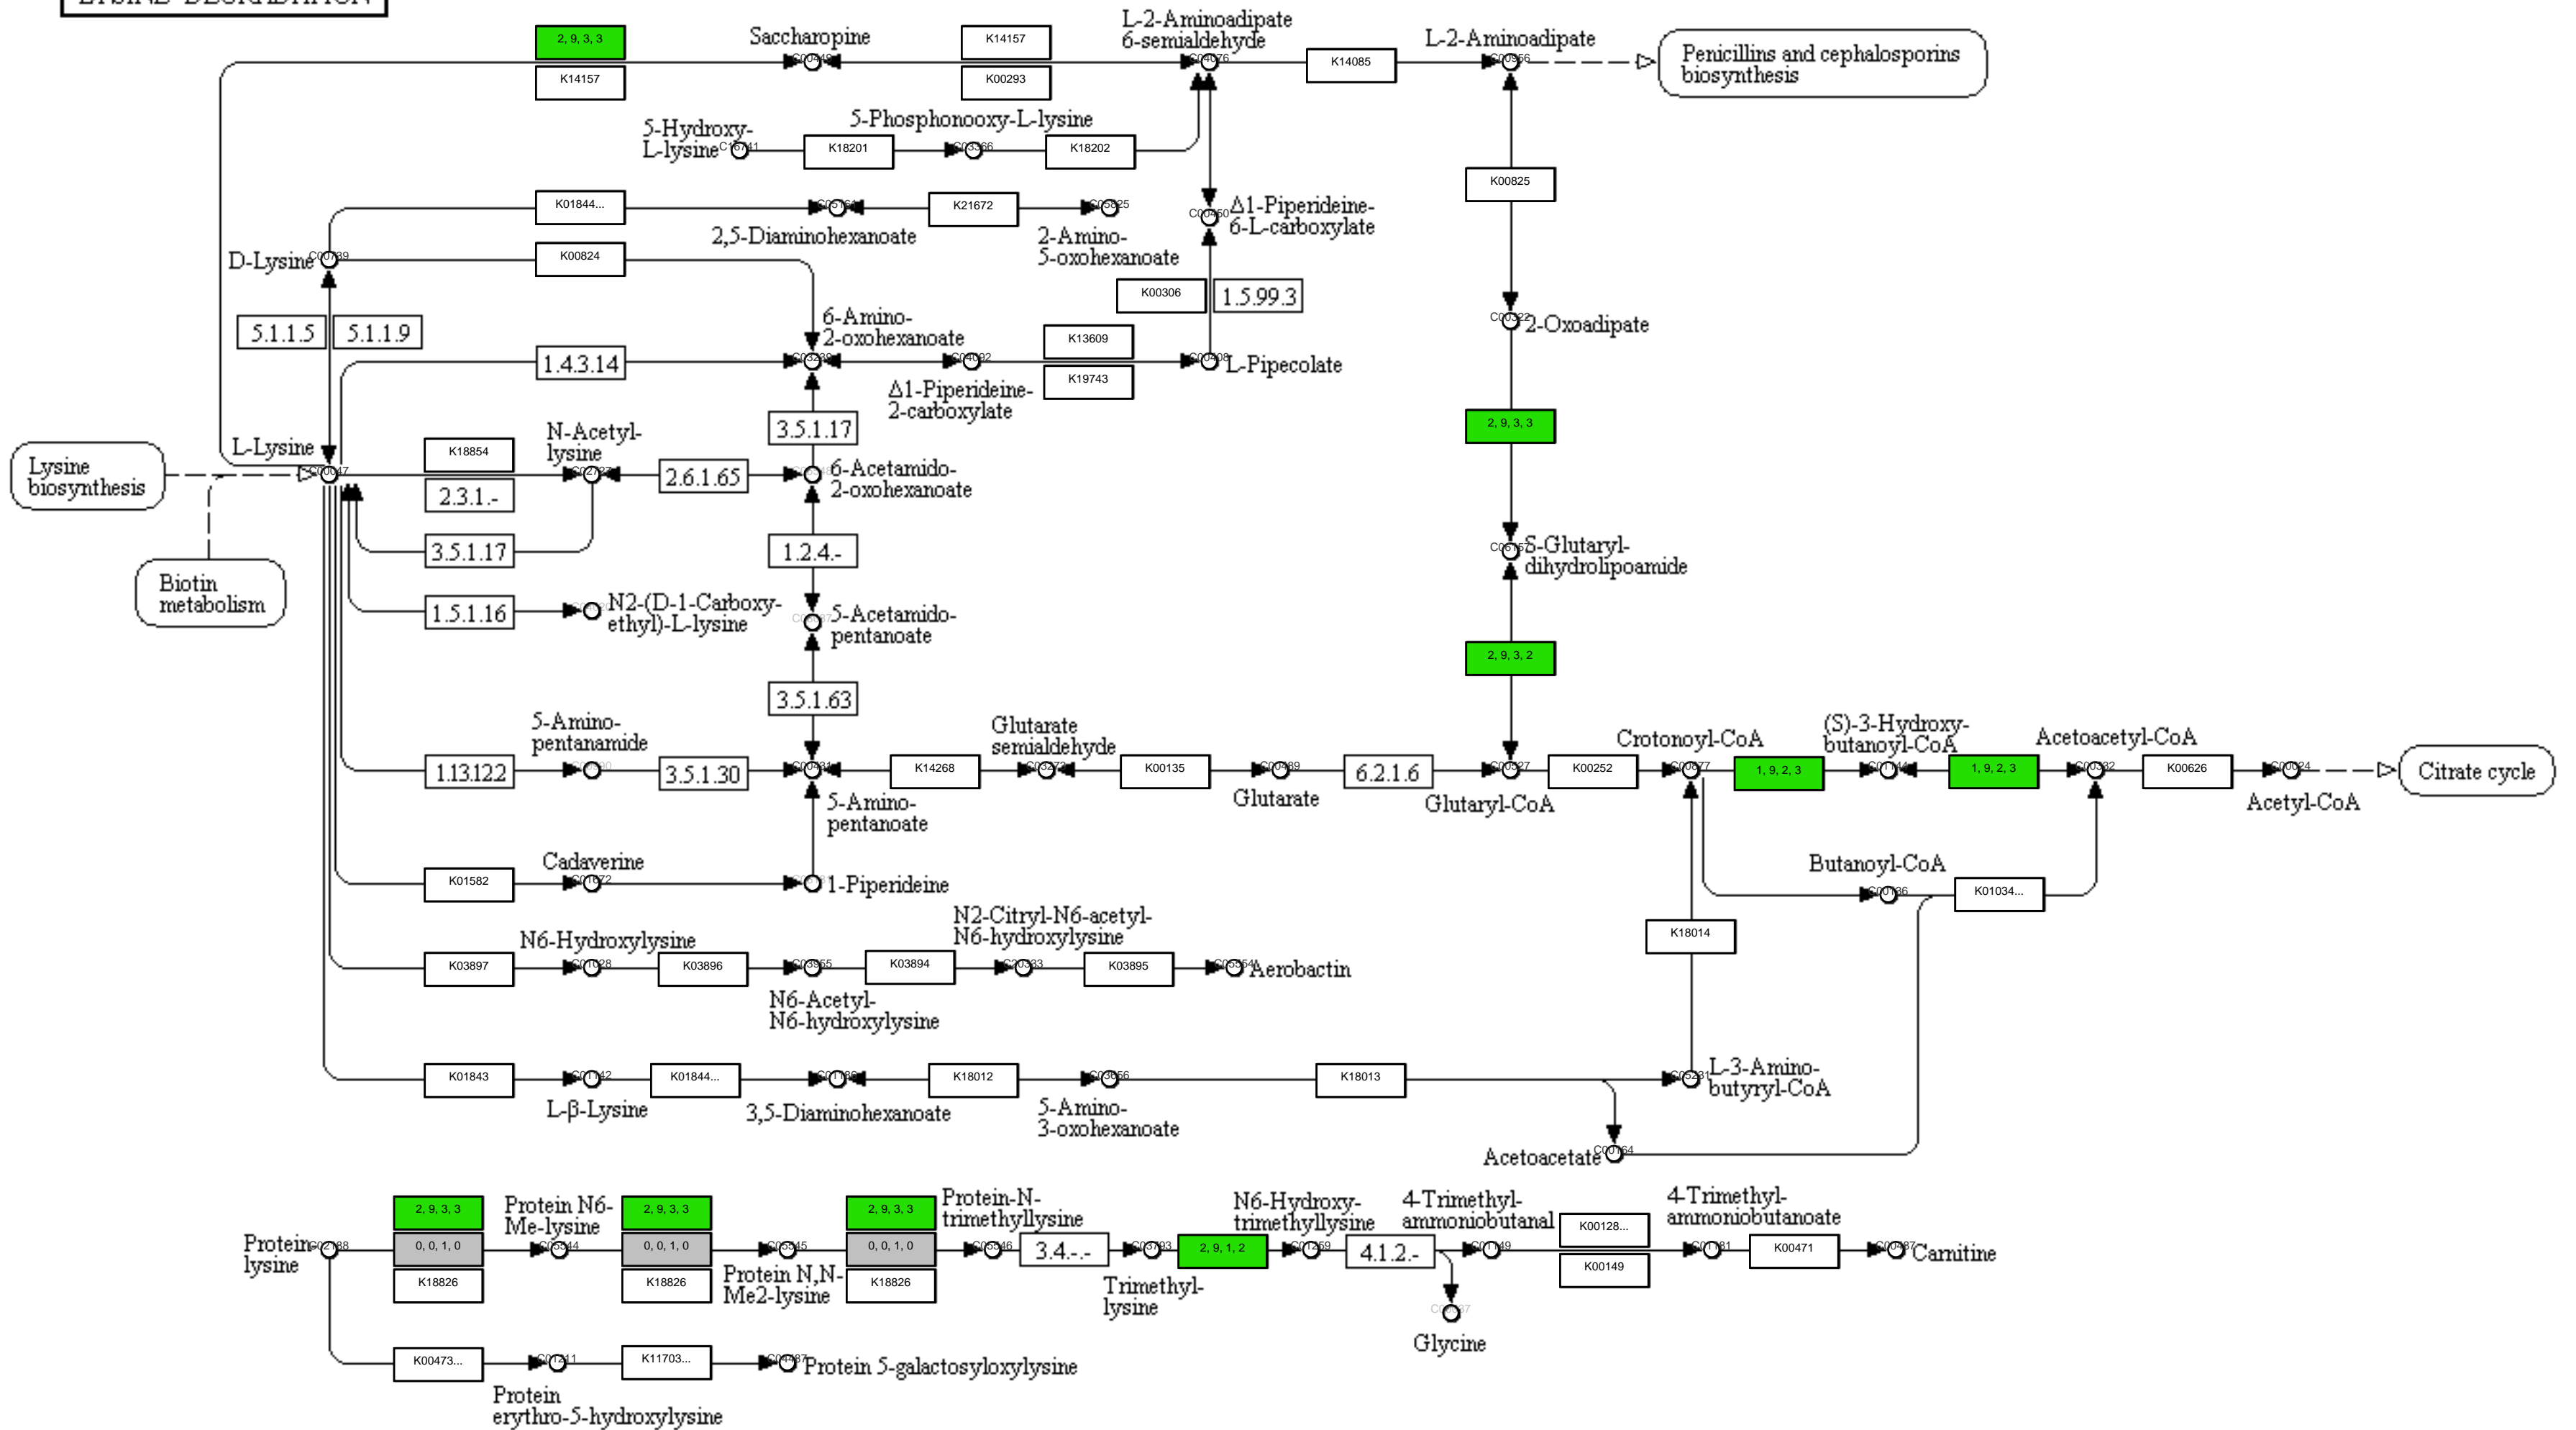

ARGININE AND PROLINE METABOLISM

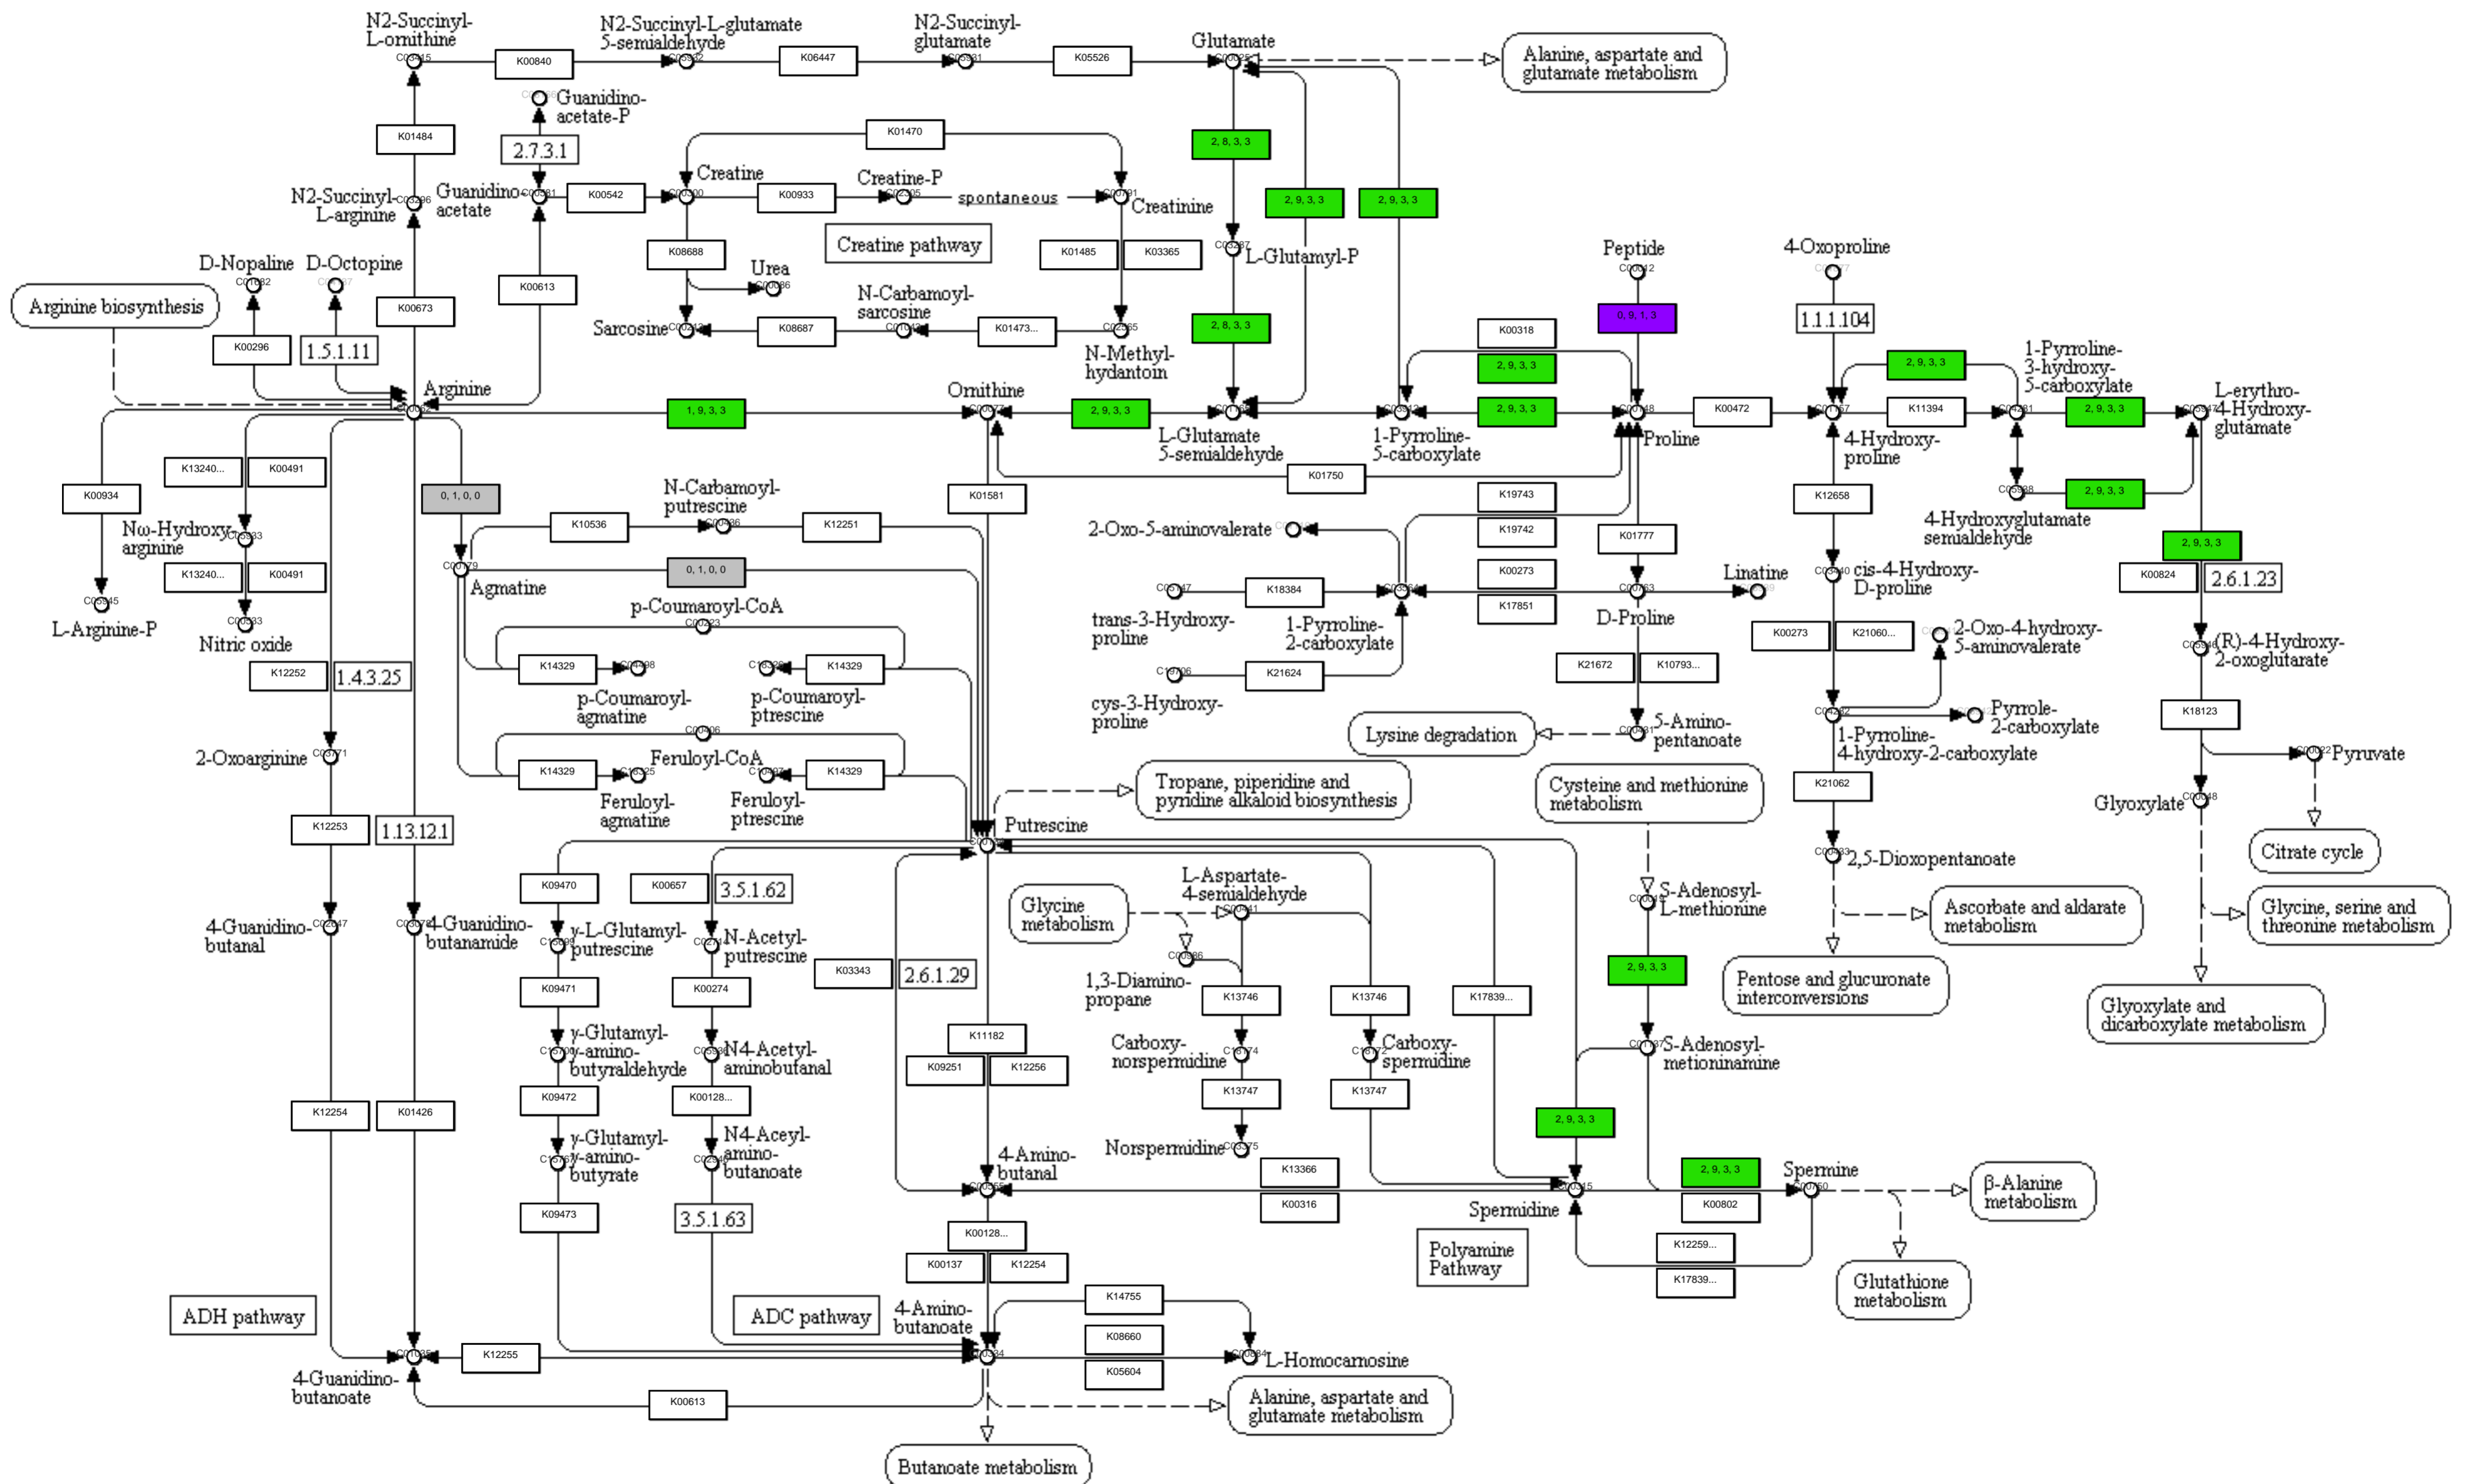

# HISTIDINE METABOLISM

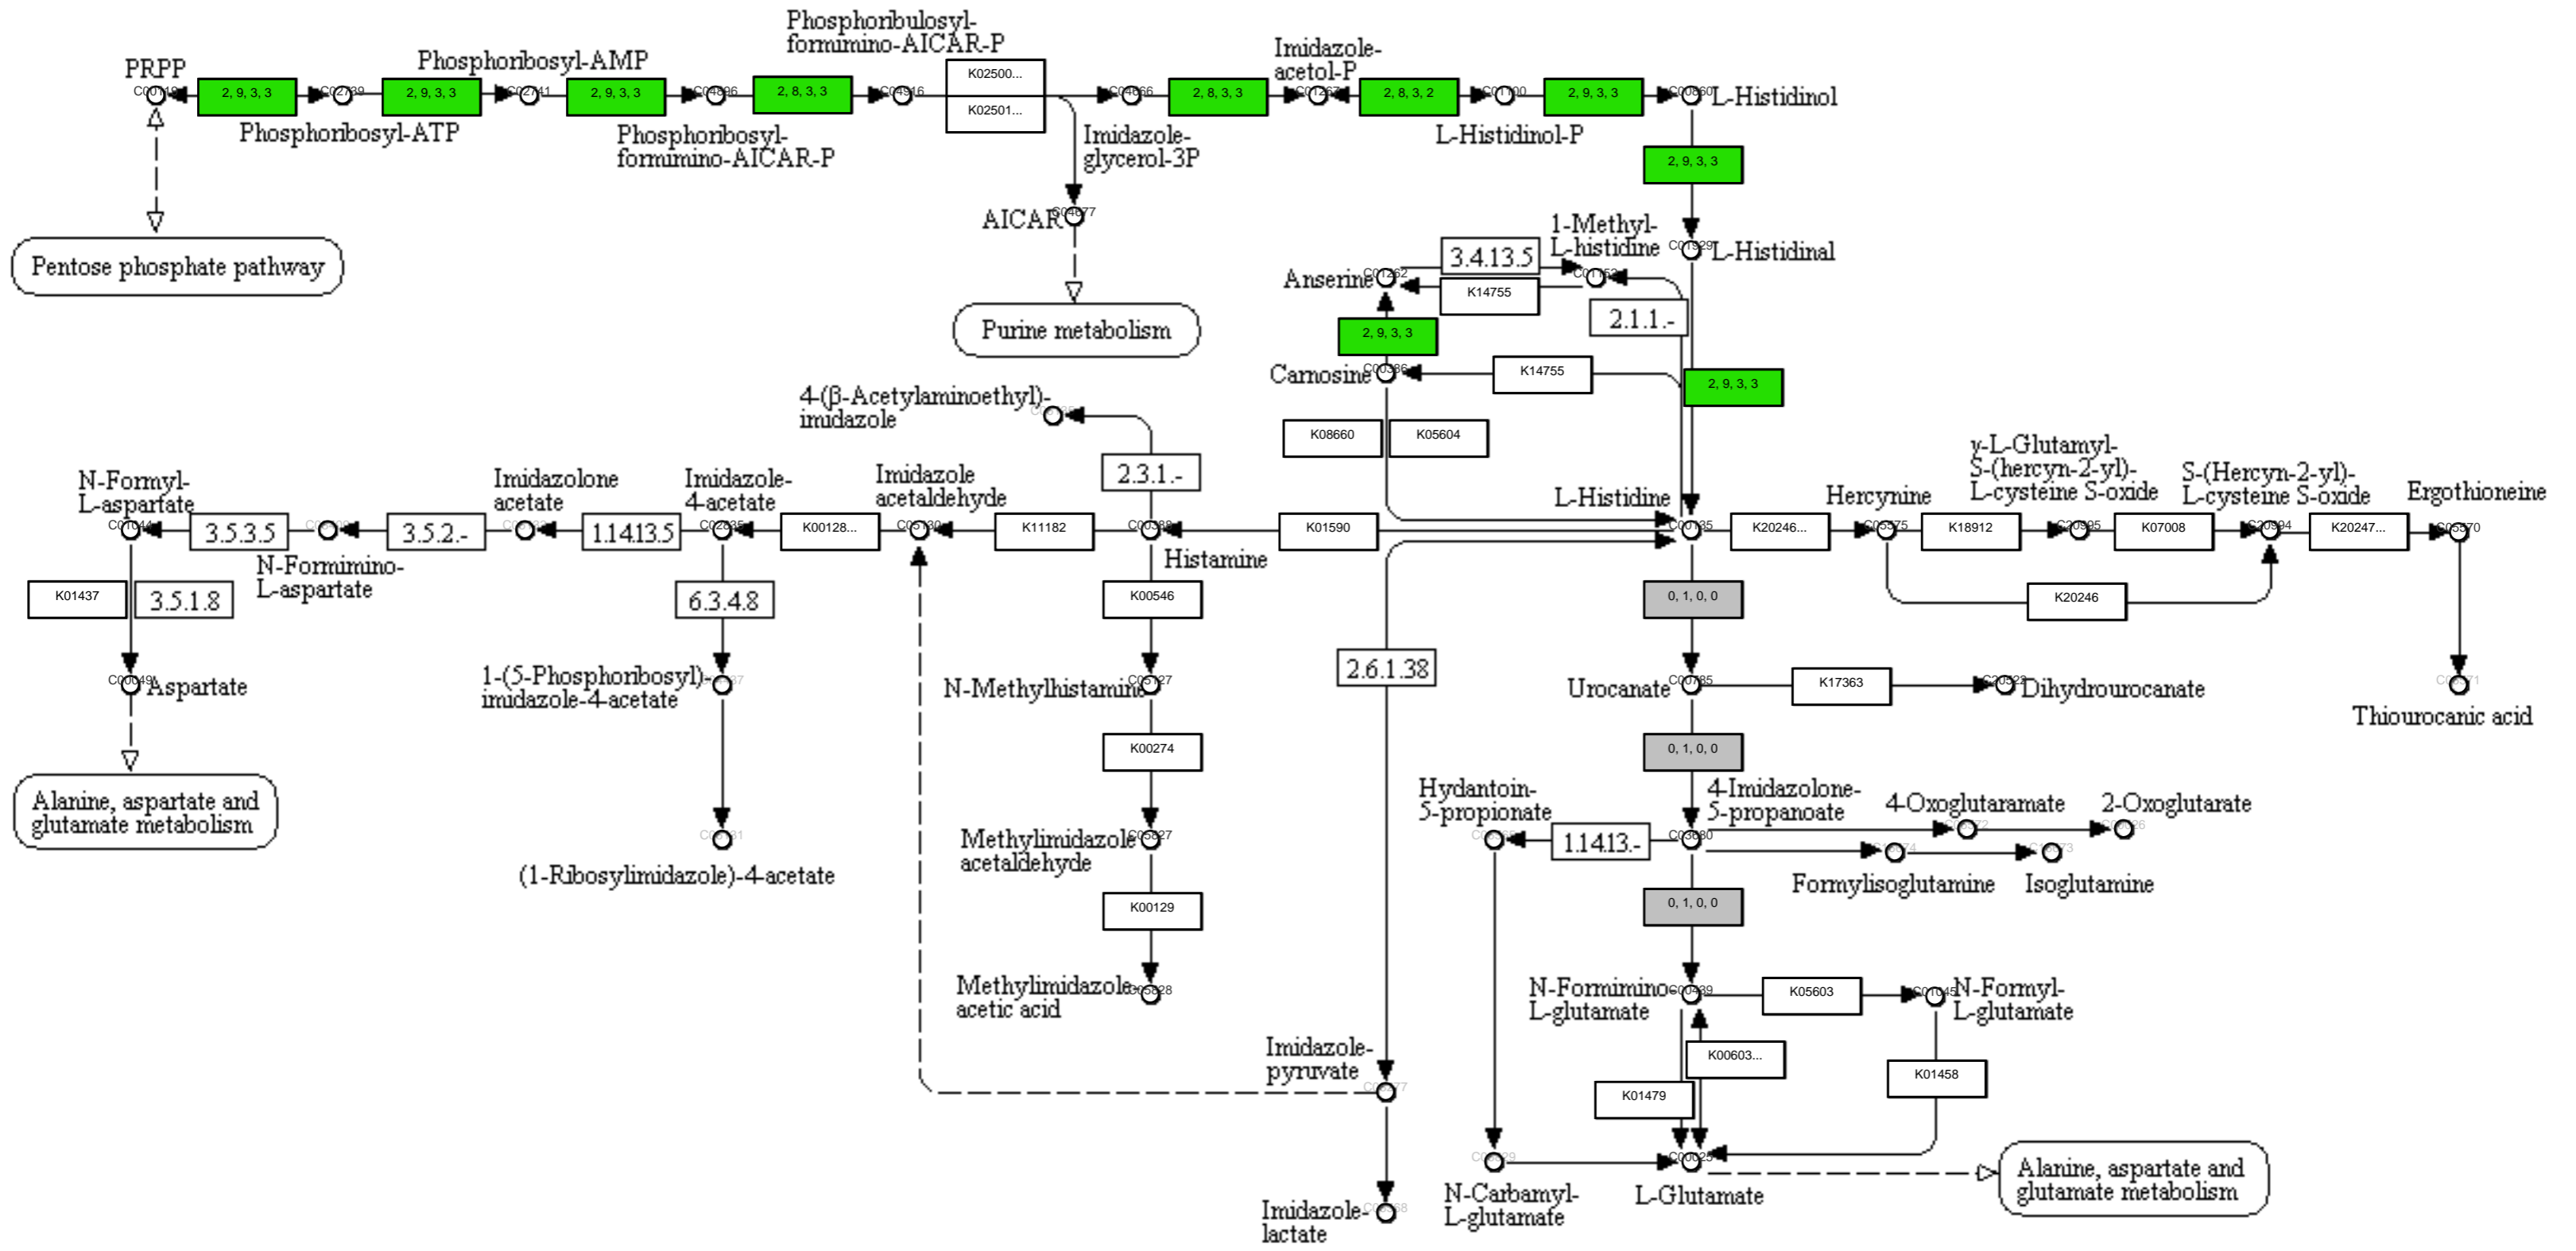













## 6. Metabolism of other amino acids

| MAP | PATHWAY                                |
|-----|----------------------------------------|
| 410 | beta-Alanine metabolism                |
| 430 | Taurine and hypotaurine metabolism     |
| 440 | Phosphonate and phosphinate metabolism |
| 450 | Selenocompound metabolism              |
| 460 | Cyanoamino acid metabolism             |
| 480 | Glutathione metabolism                 |

# β-ALANINE METABOLISM

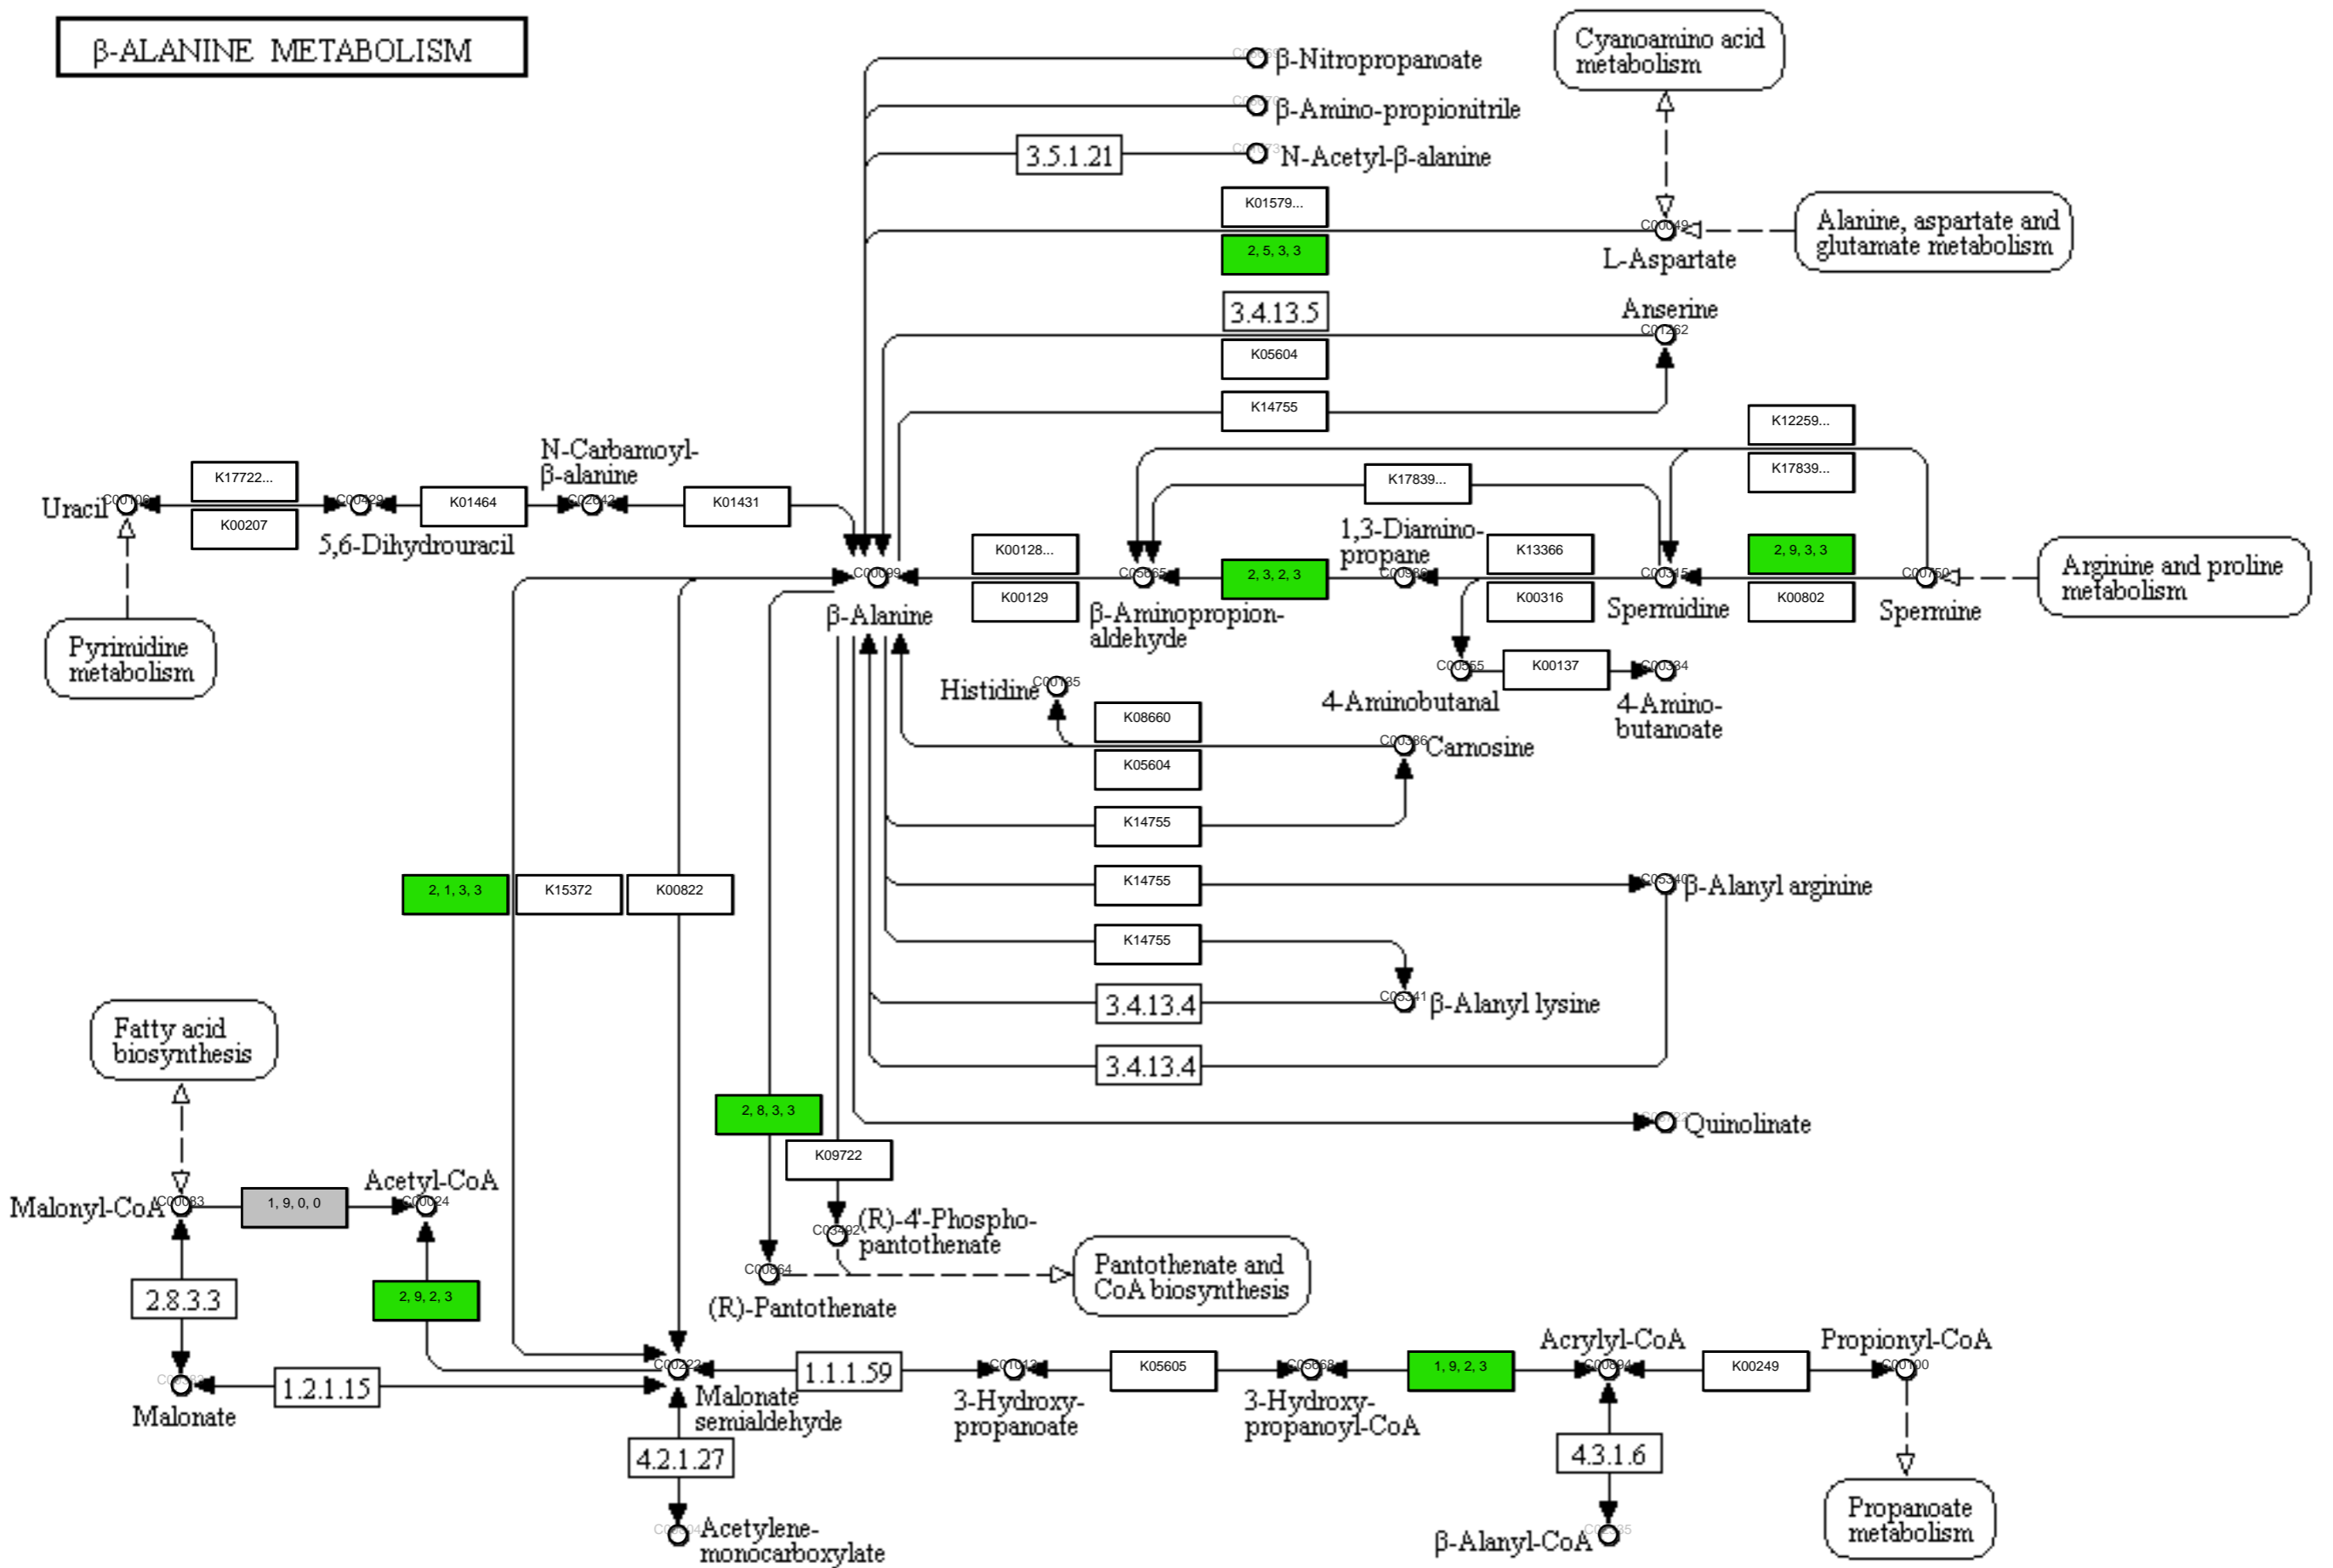

# TAURINE AND HYPOTAURINE METABOLISM

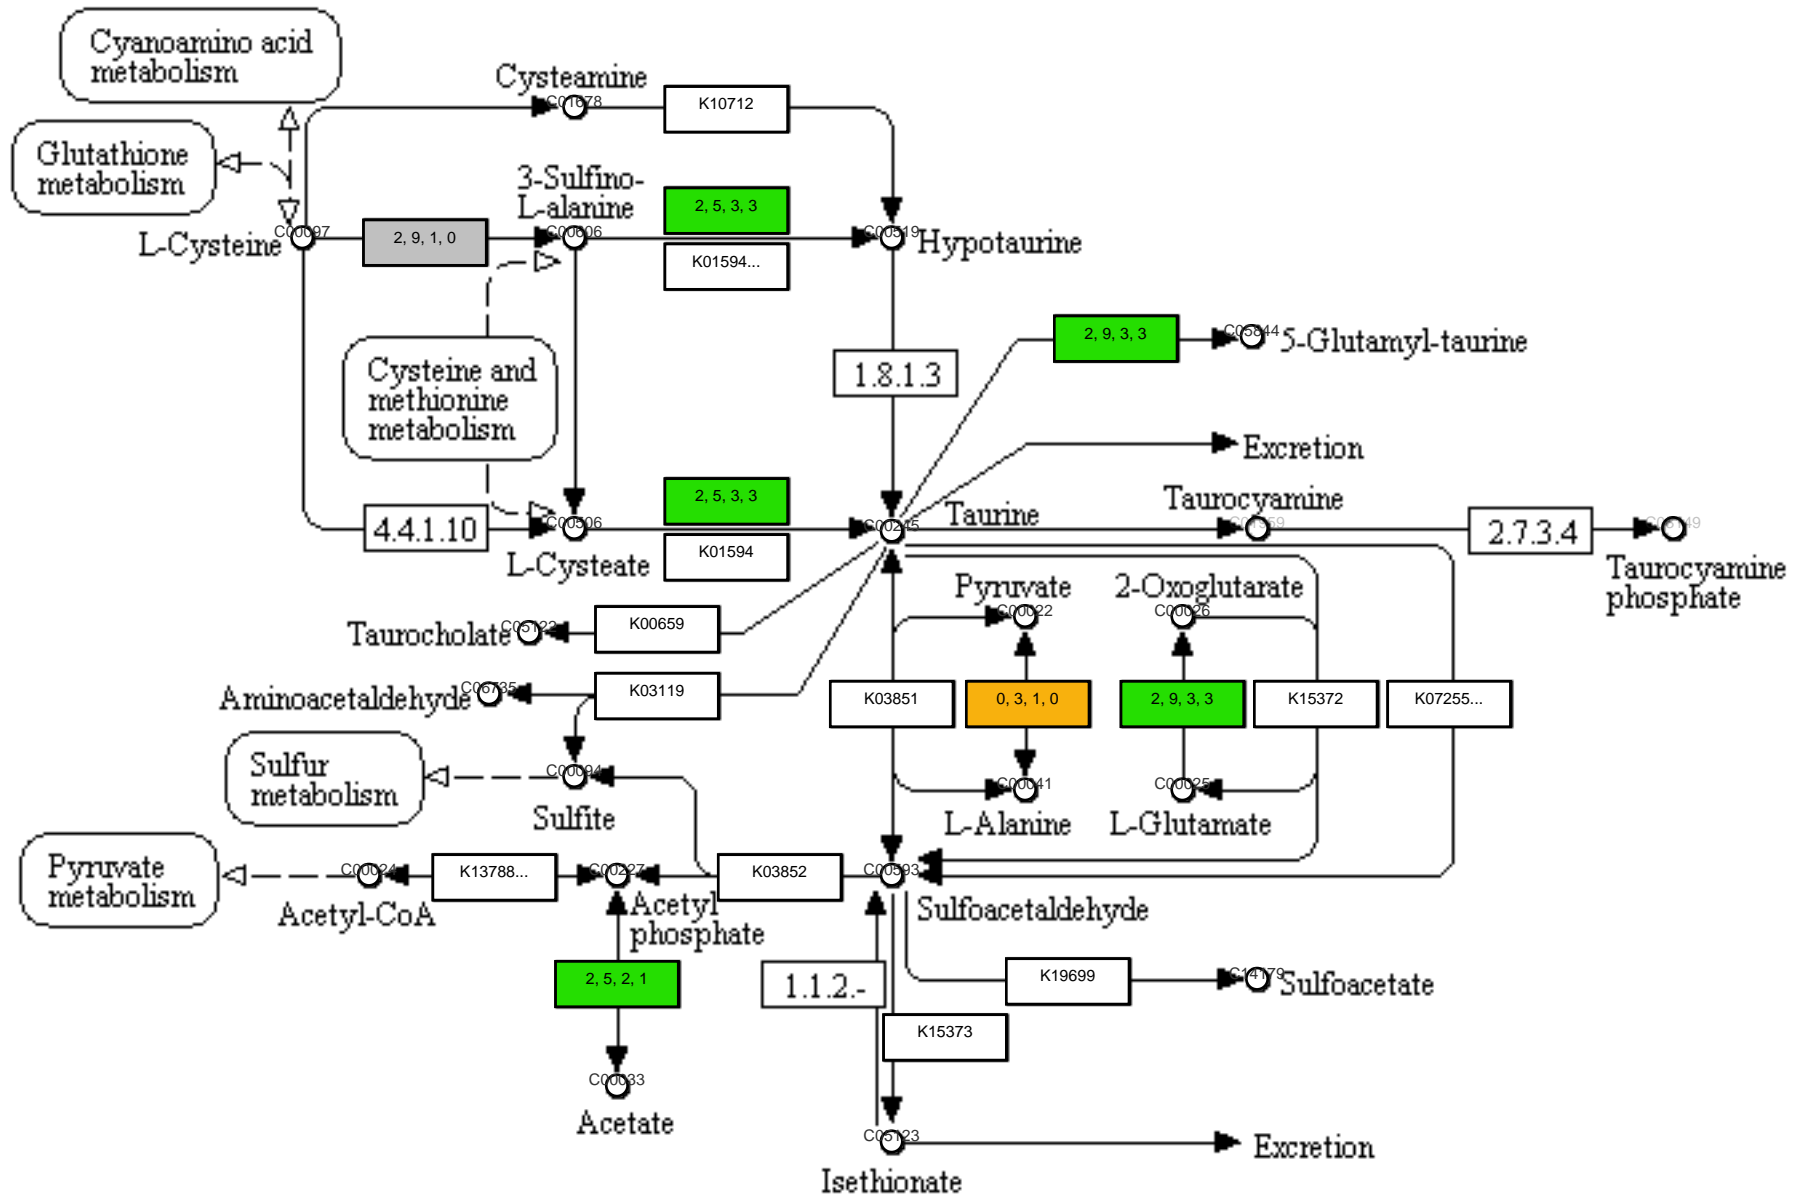

# PHOSPHONATE AND PHOSPHINATE METABOLISM

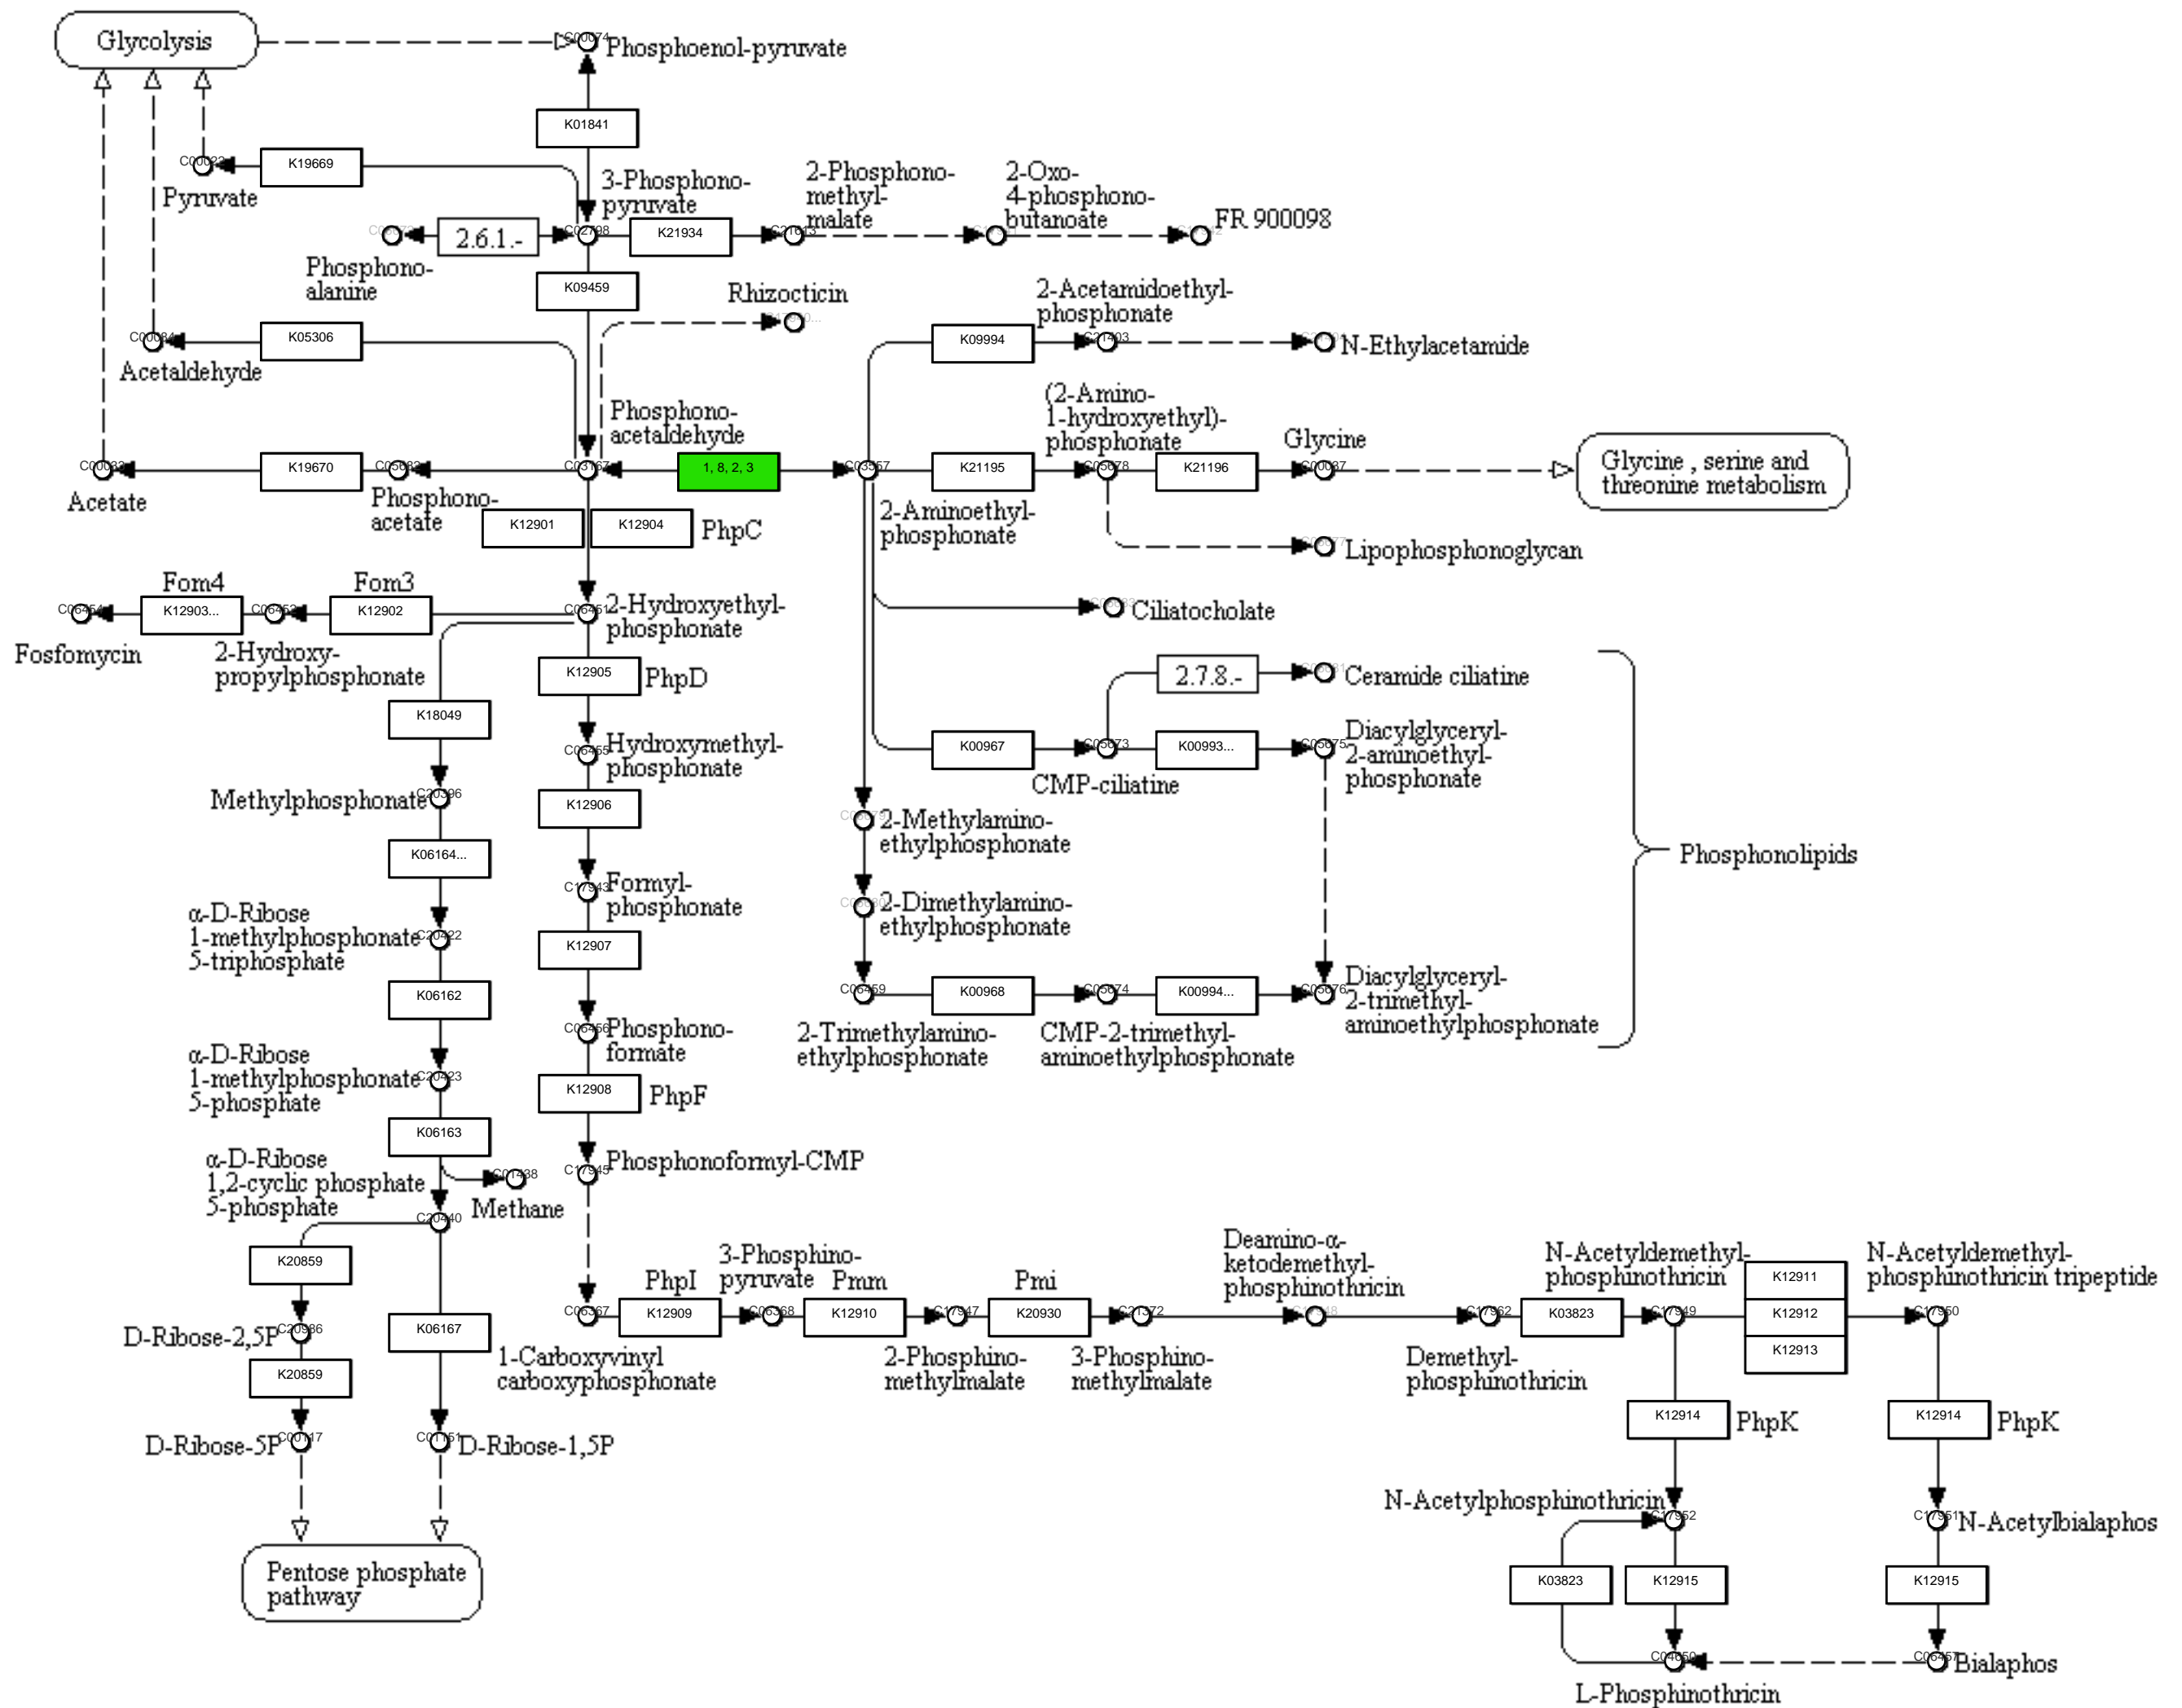

# SELENOCOMPOUND METABOLISM

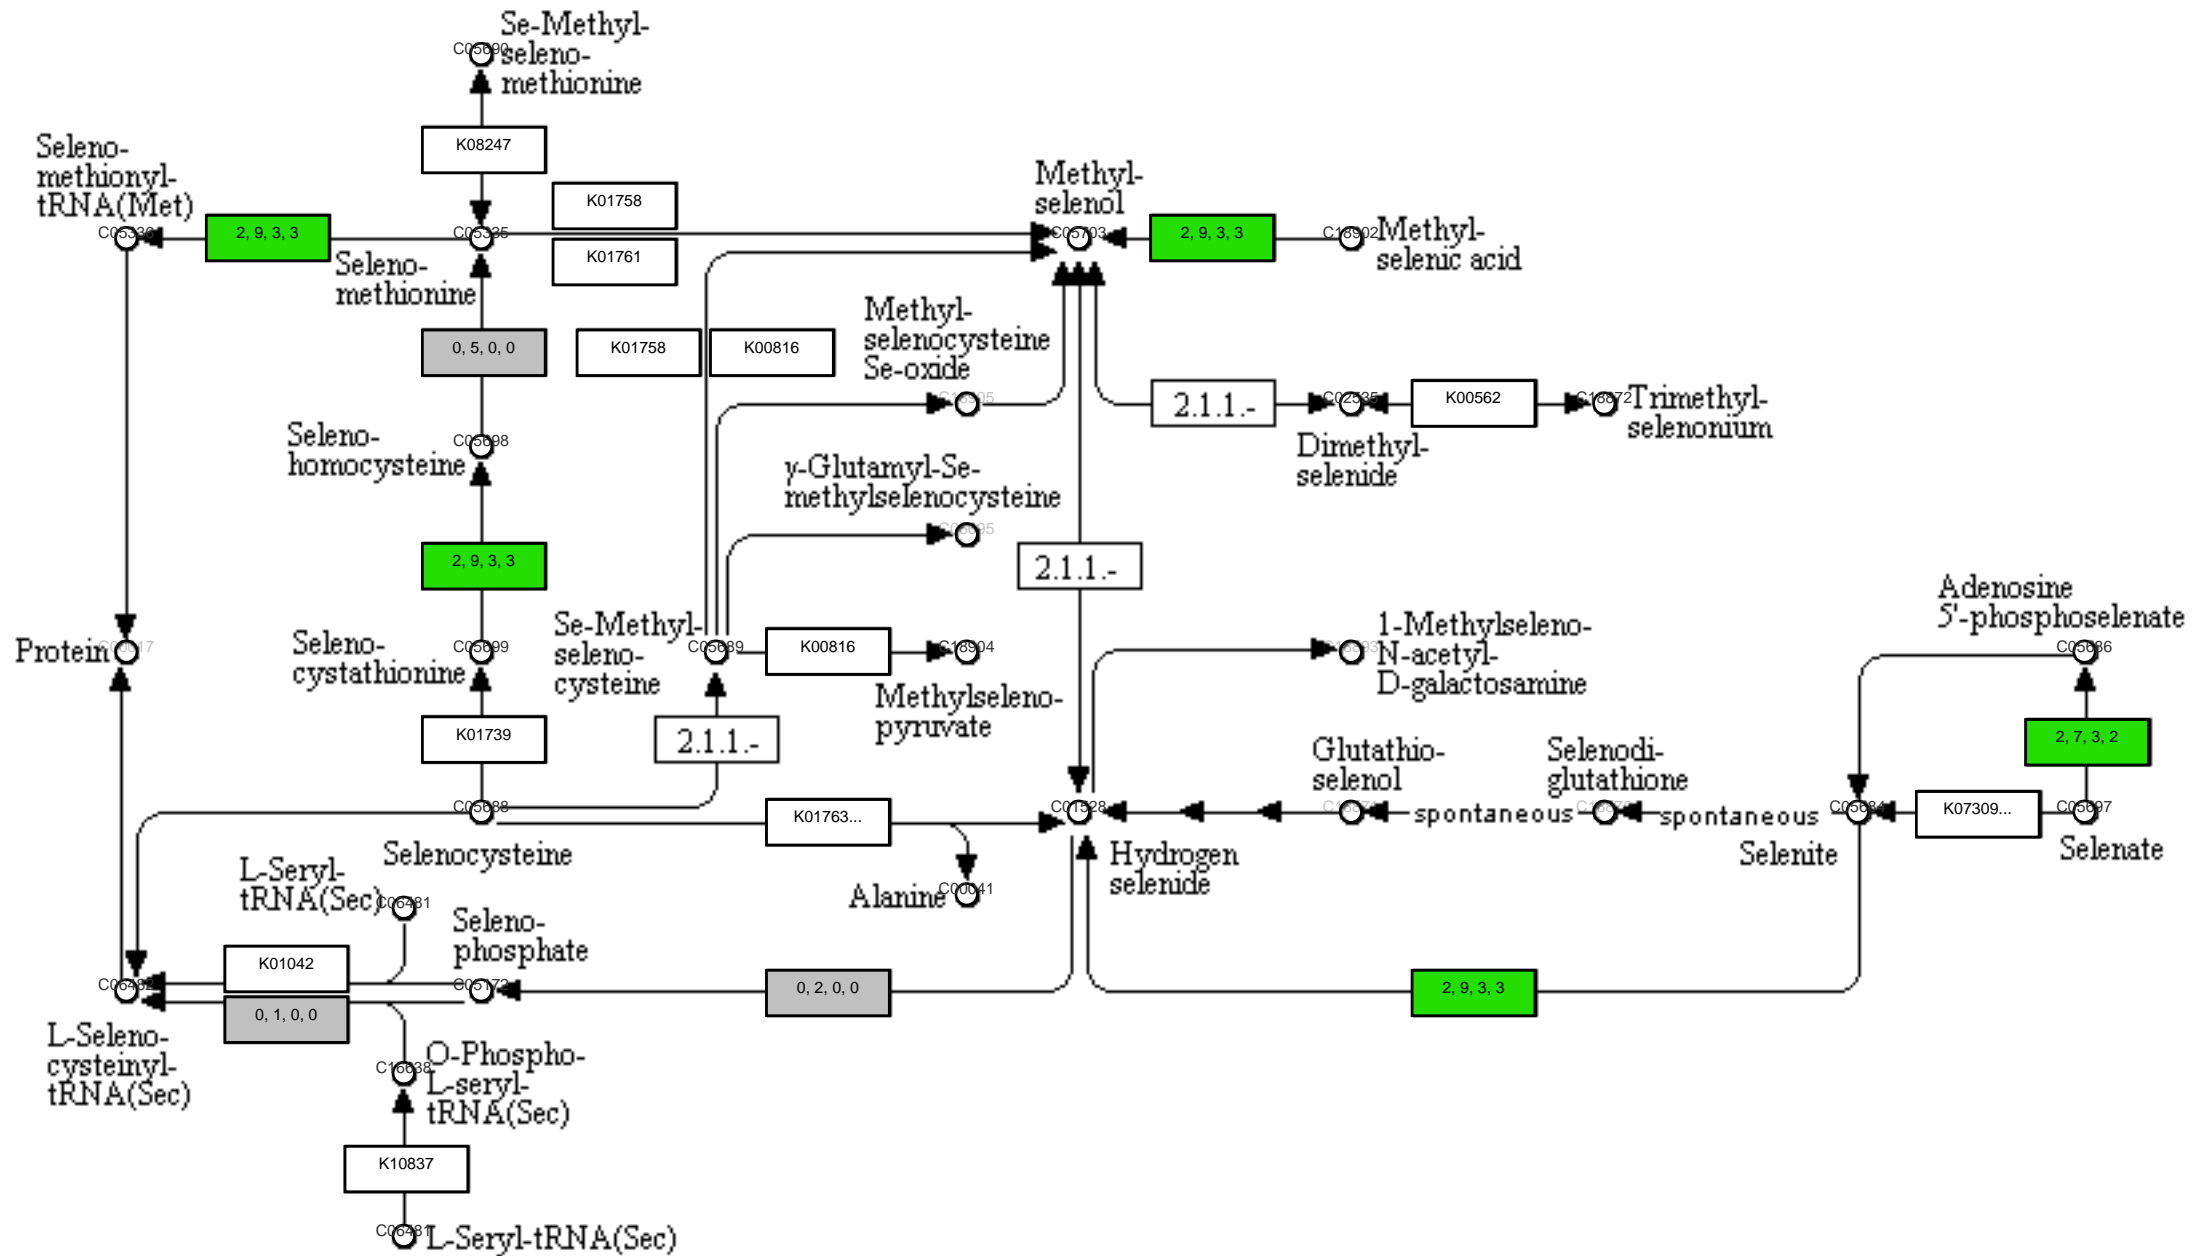



CYANOAMINO ACID METABOLISM

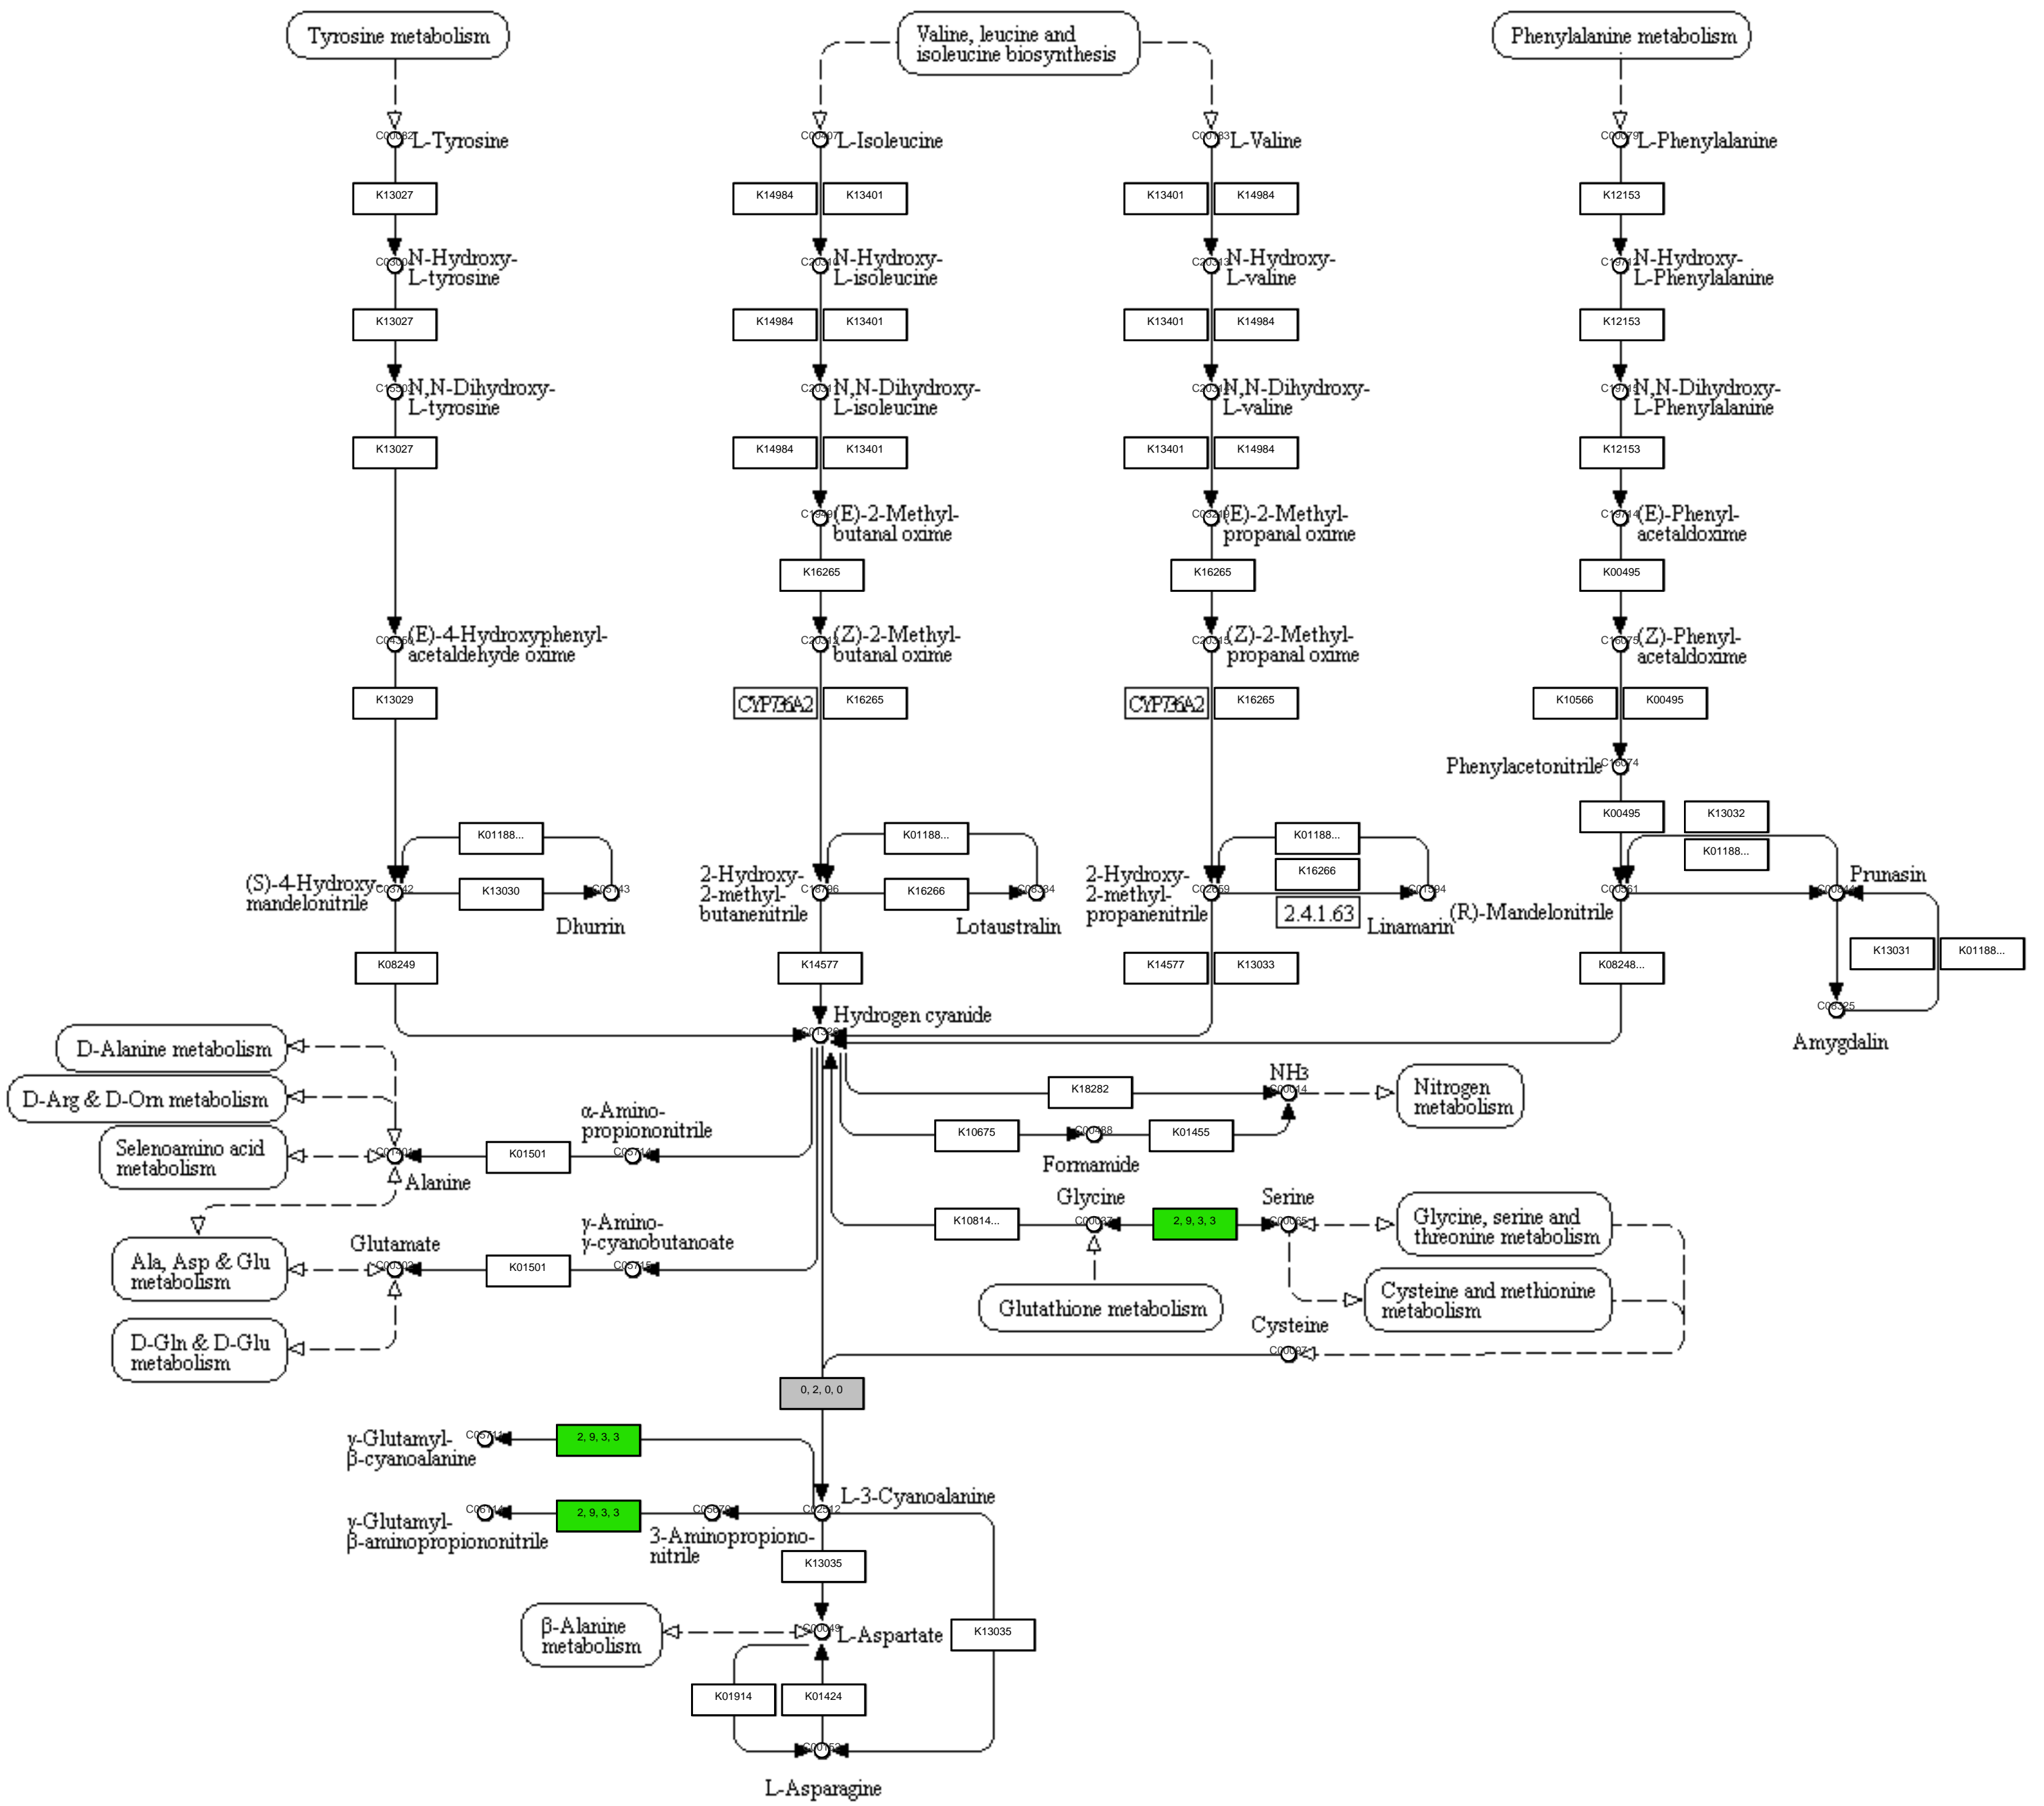



# 7. Glycan biosynthesis and metabolism

| MAP        | PATHWAY                                                |
|------------|--------------------------------------------------------|
| <b>510</b> | N-Glycan biosynthesis                                  |
| <b>513</b> | Various types of N-glycan biosynthesis                 |
| <b>531</b> | Glycosaminoglycan degradation                          |
| <b>563</b> | Glycosylphosphatidylinositol (GPI)-anchor biosynthesis |

# N-GLYCAN BIOSYNTHESIS

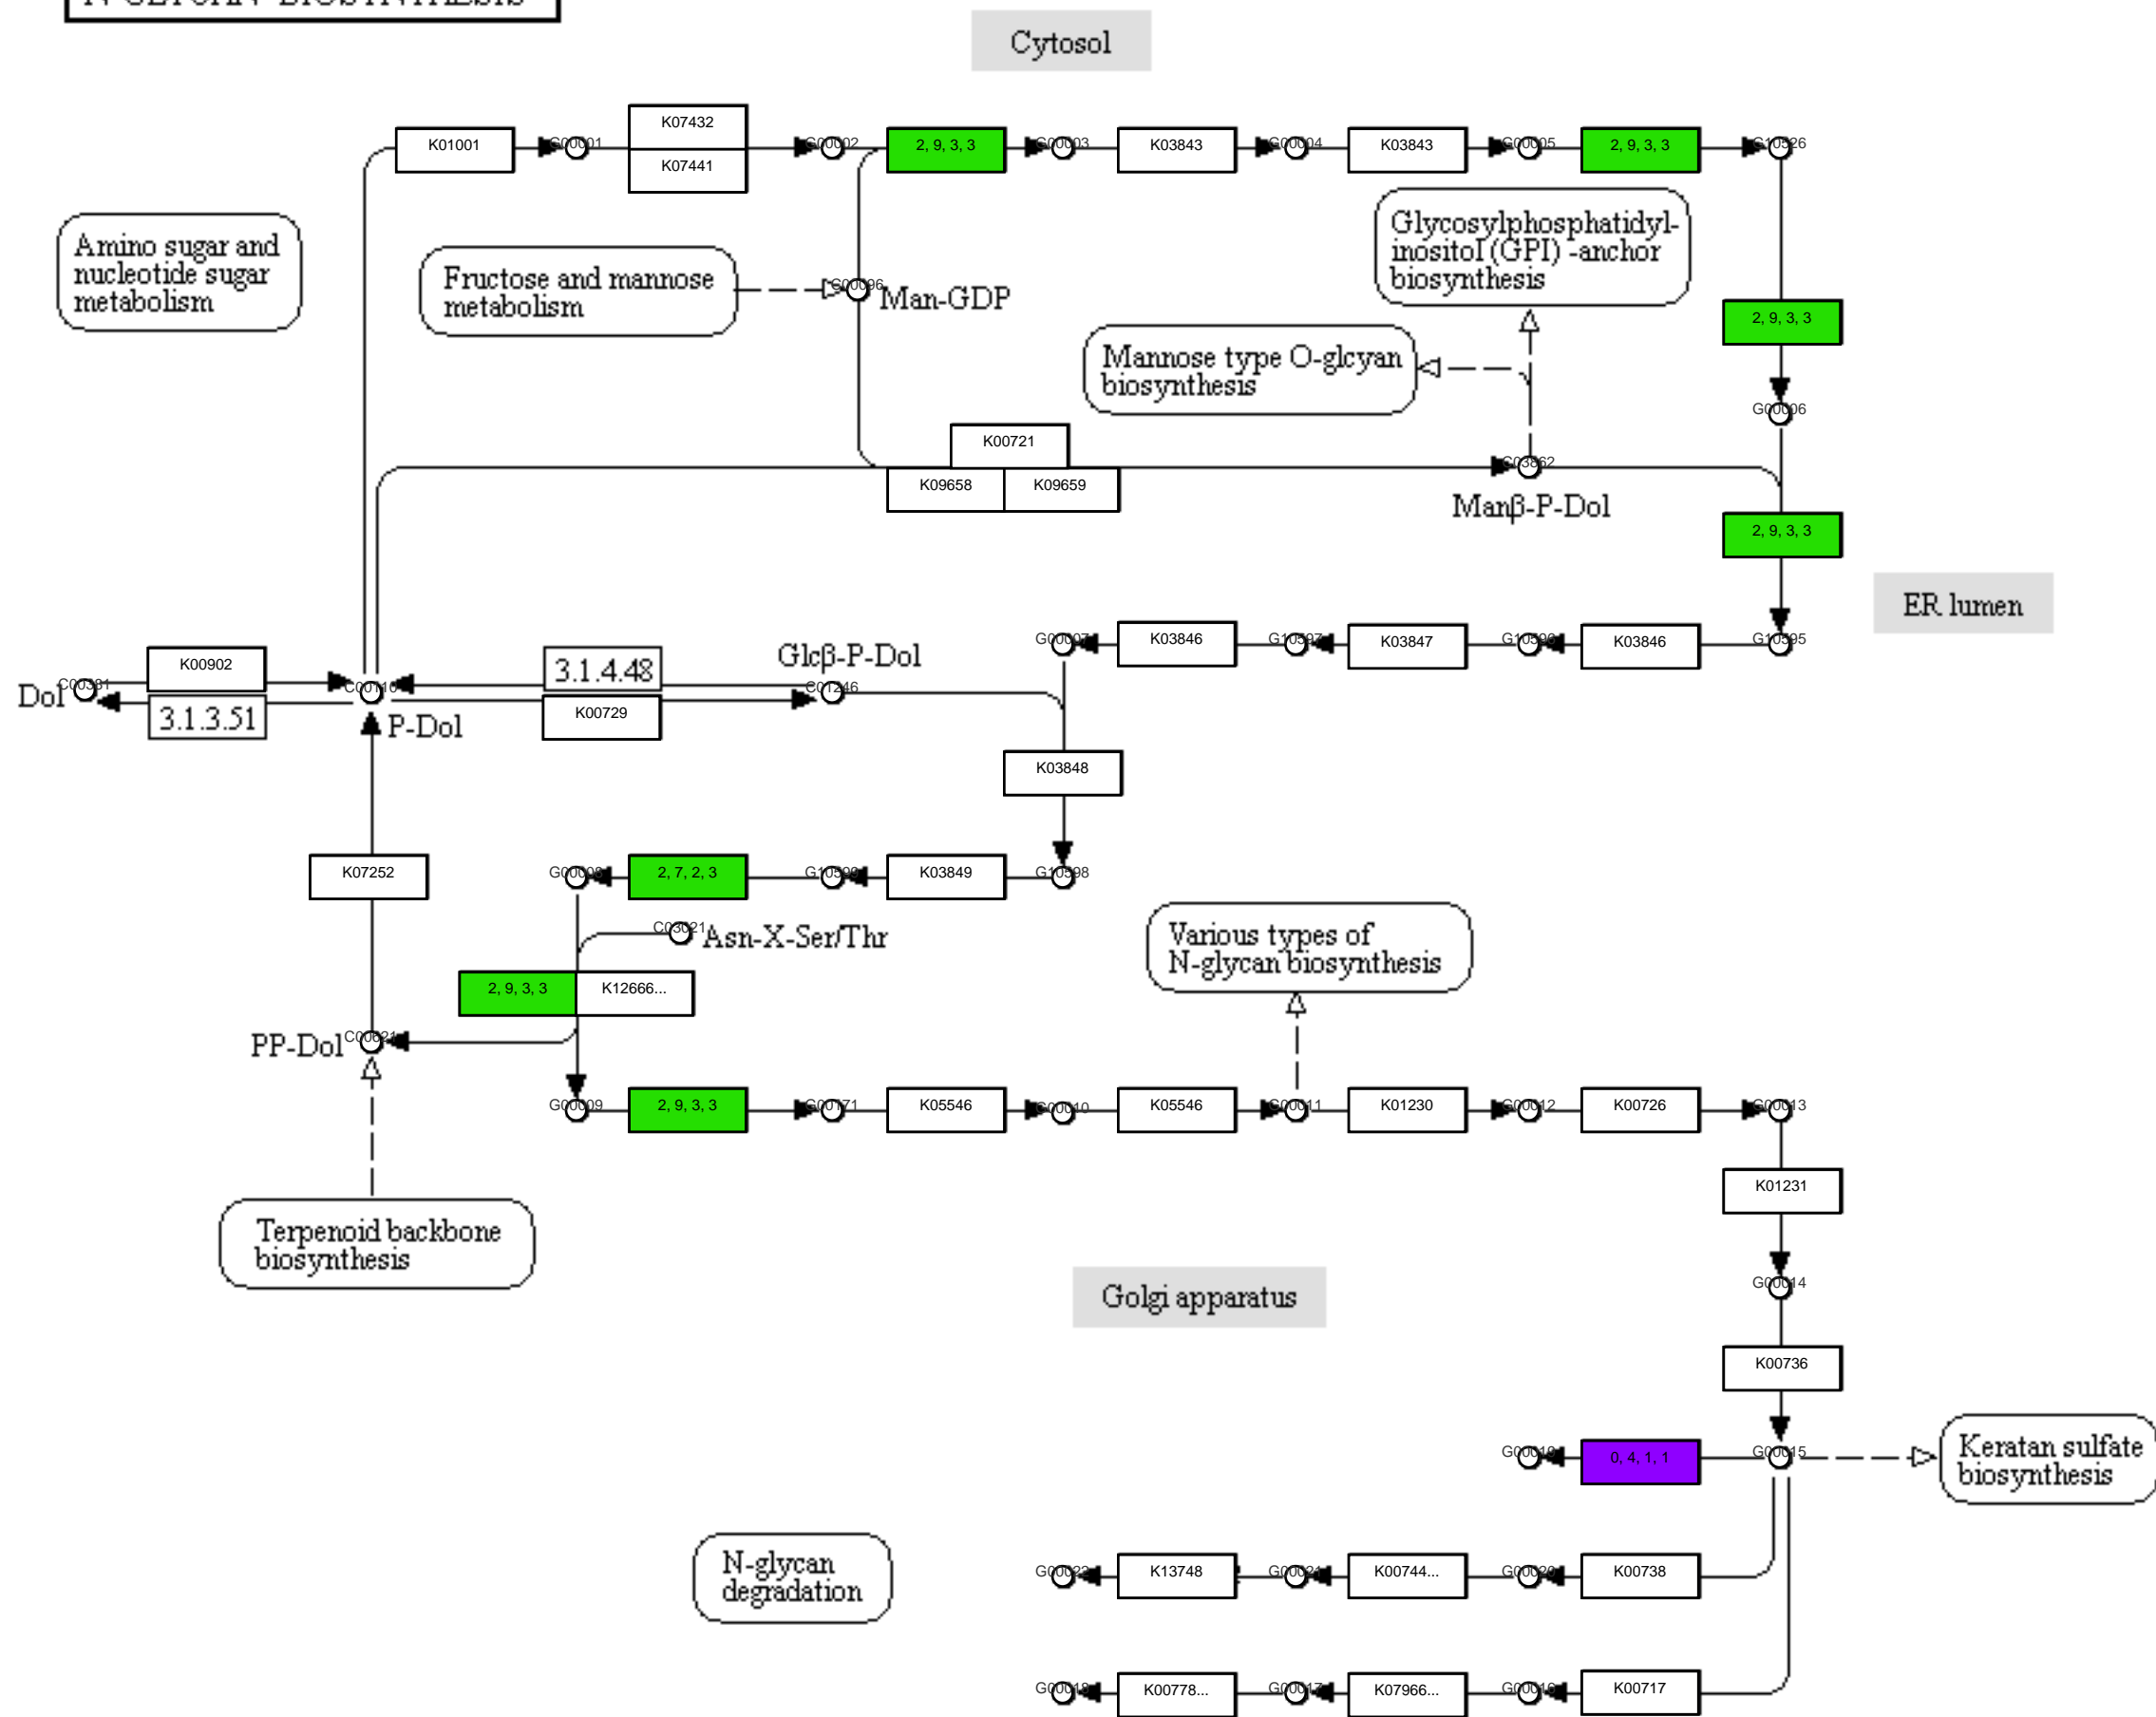

## N-glycan precursor biosynthesis

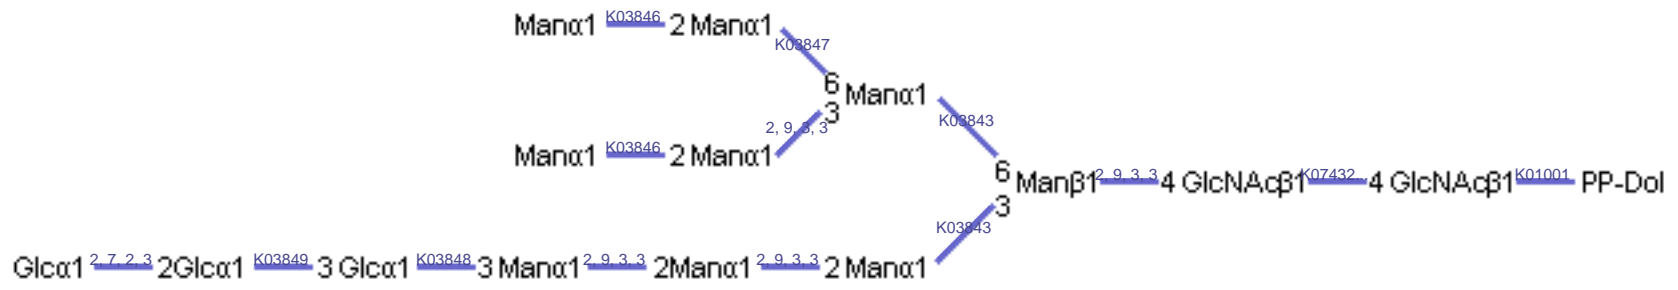

## Trimming to form core structure

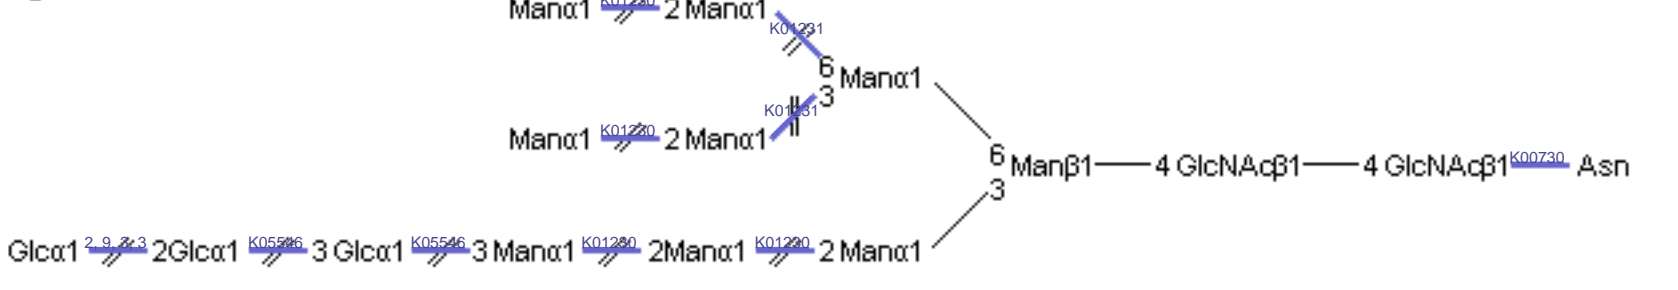

## Glycan extension from core structure

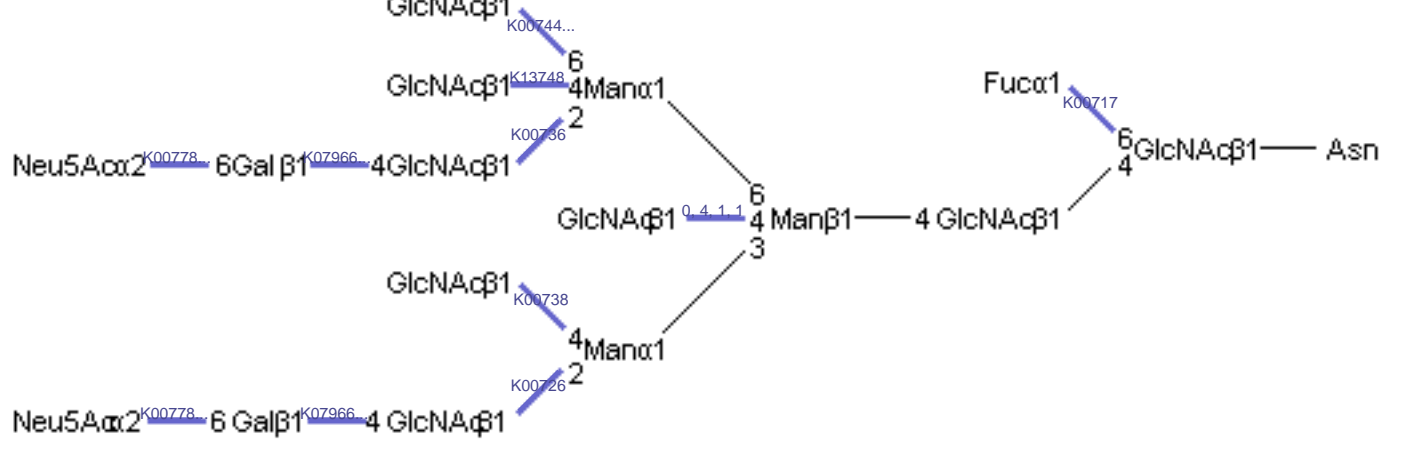



# GLYCOSAMINOGLYCAN DEGRADATION

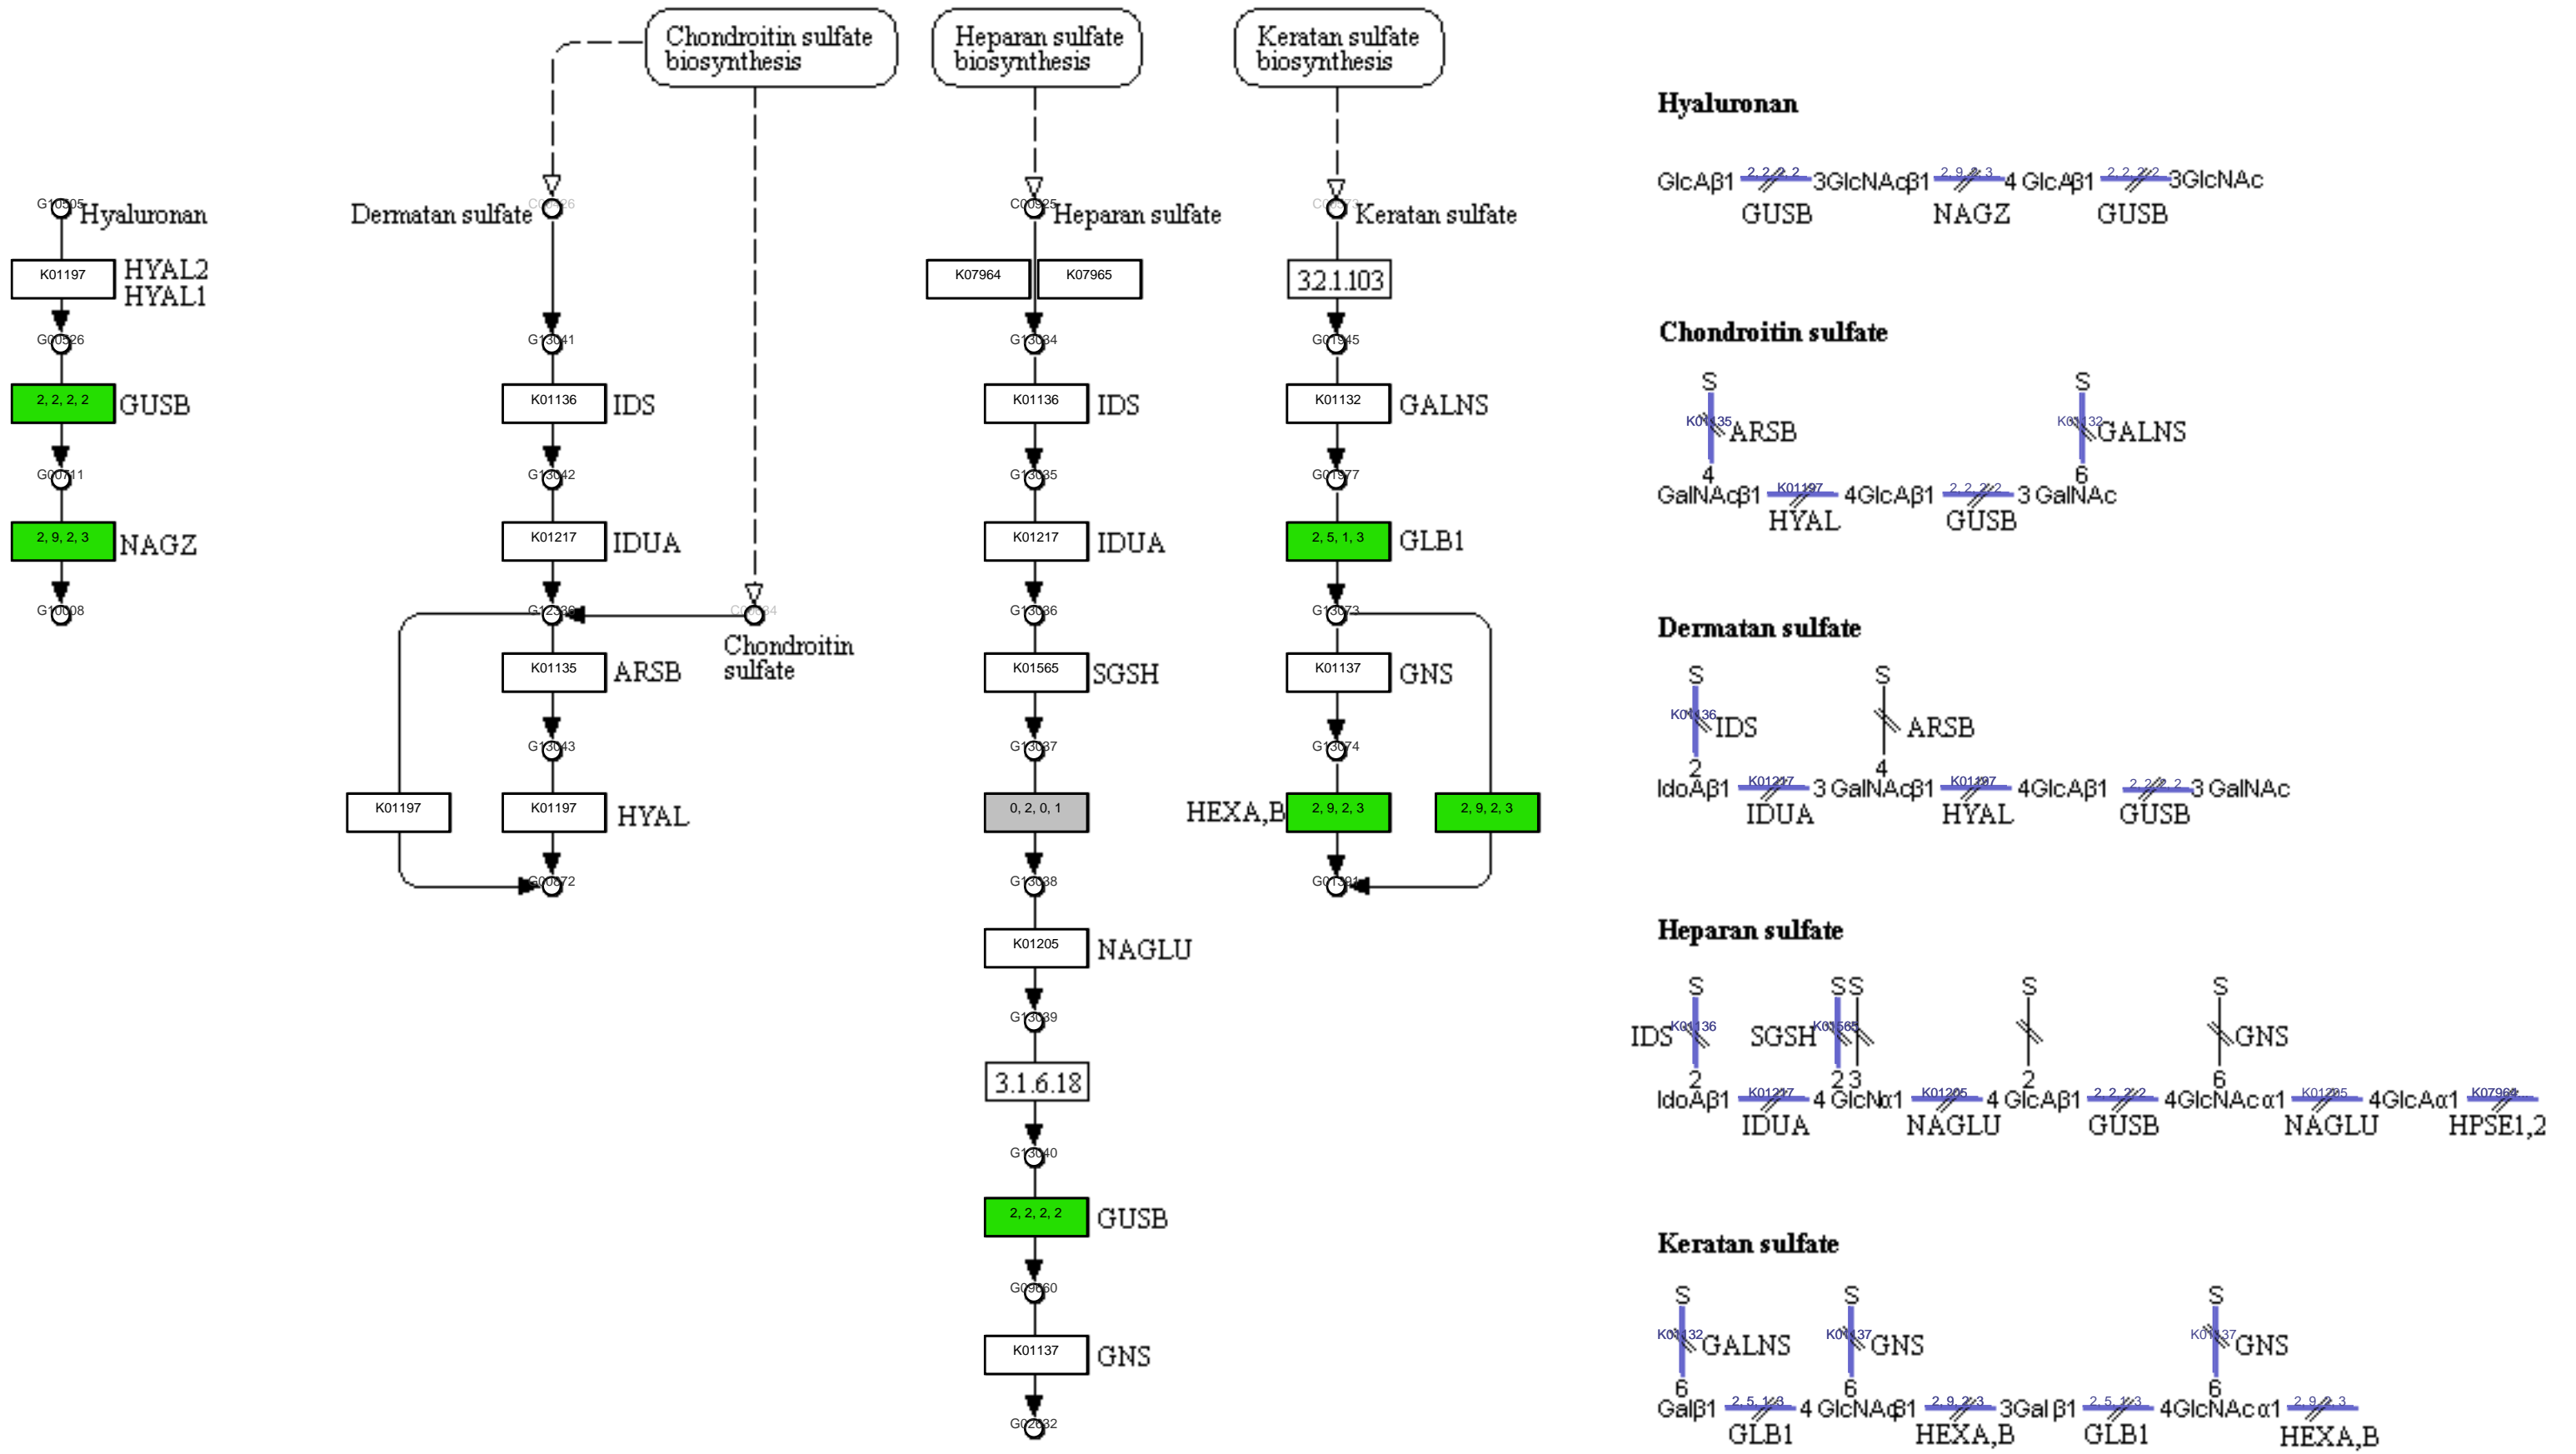



# GLYCOSYLPHOSPHATIDYLINOSITOL (GPI) - ANCHOR BIOSYNTHESIS

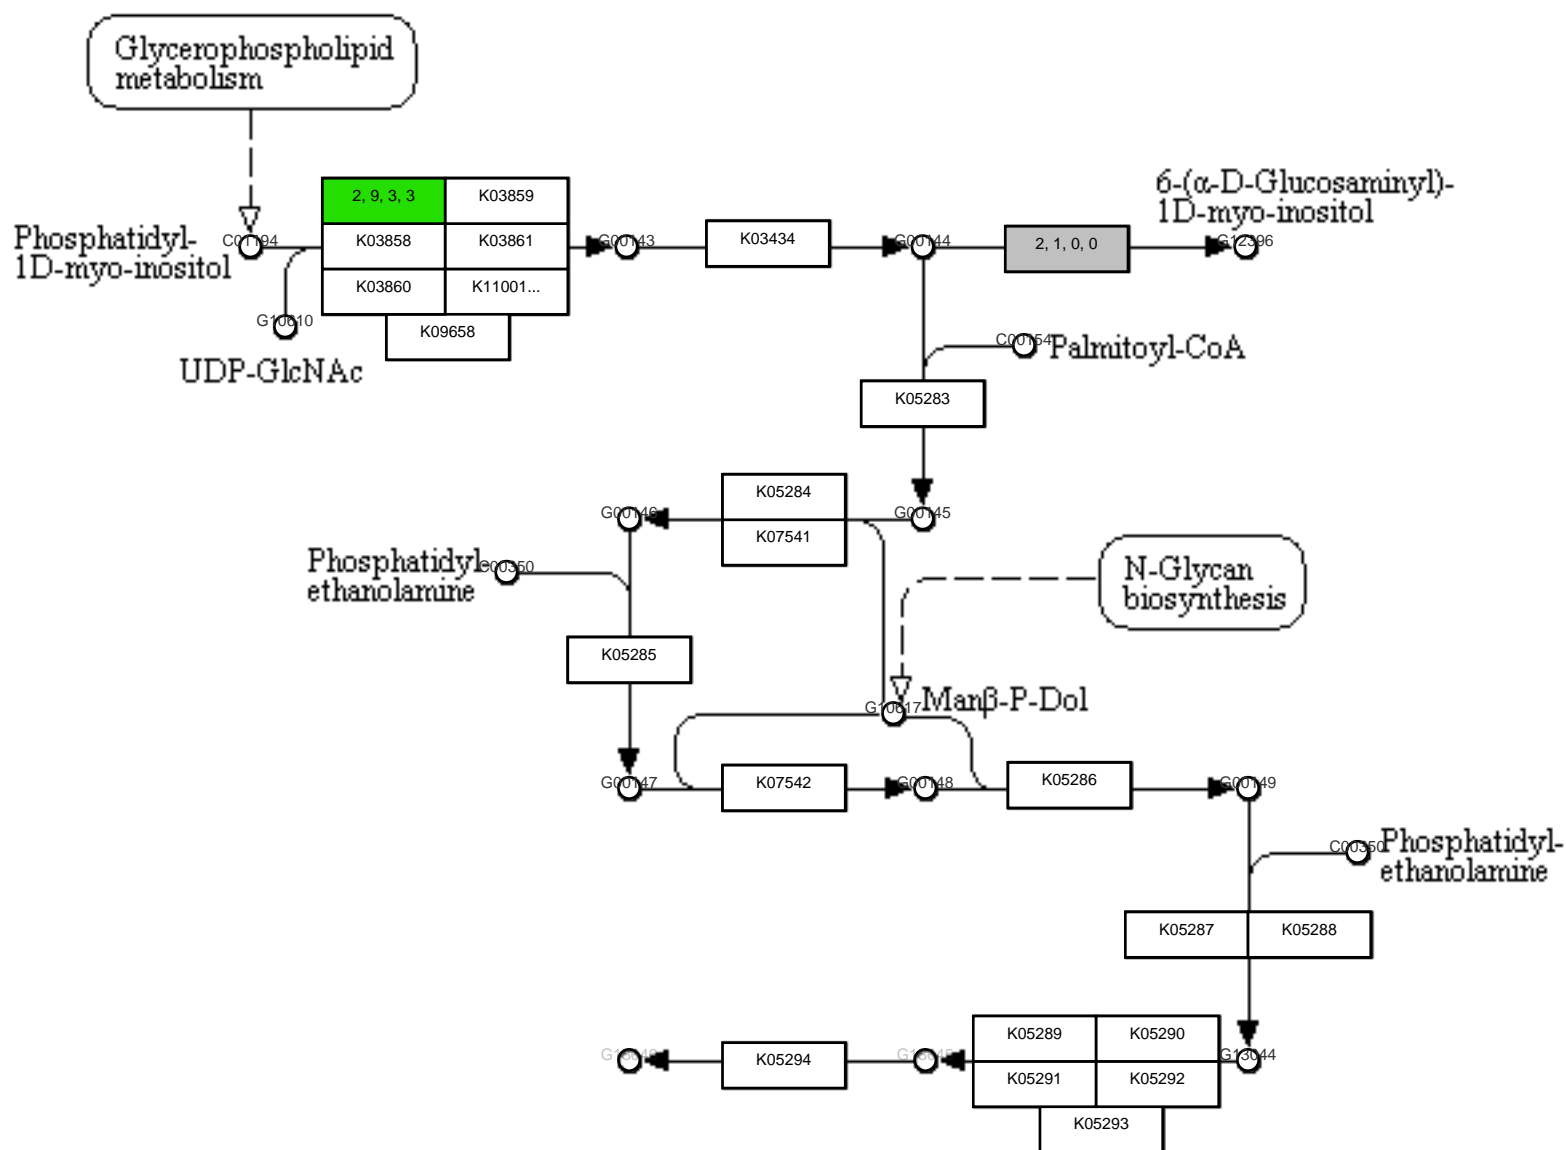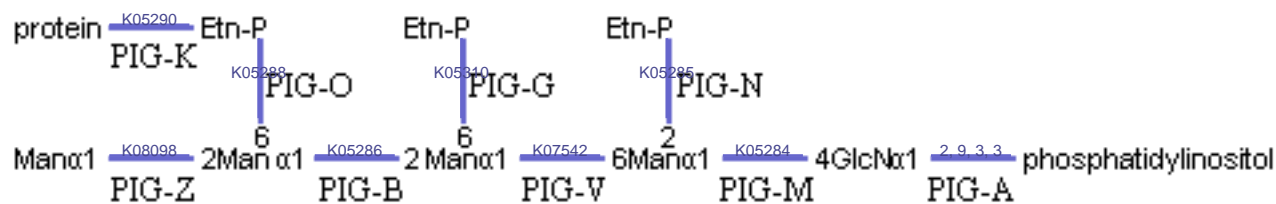

## 8. Metabolism of cofactors and vitamins

| MAP | PATHWAY                                             |
|-----|-----------------------------------------------------|
| 130 | Ubiquinone and other terpenoid-quinone biosynthesis |
| 670 | One carbon pool by folate                           |
| 730 | Thiamine metabolism                                 |
| 740 | Riboflavin metabolism                               |
| 750 | Vitamin B6 metabolism                               |
| 760 | Nicotinate and nicotinamide metabolism              |
| 770 | Pantothenate and CoA biosynthesis                   |
| 780 | Biotin metabolism                                   |
| 785 | Lipoic acid metabolism                              |
| 790 | Folate biosynthesis                                 |
| 860 | Porphyrin and chlorophyll metabolism                |

UBIQUINONE AND OTHER TERPENOID-QUINONE BIOSYNTHESIS

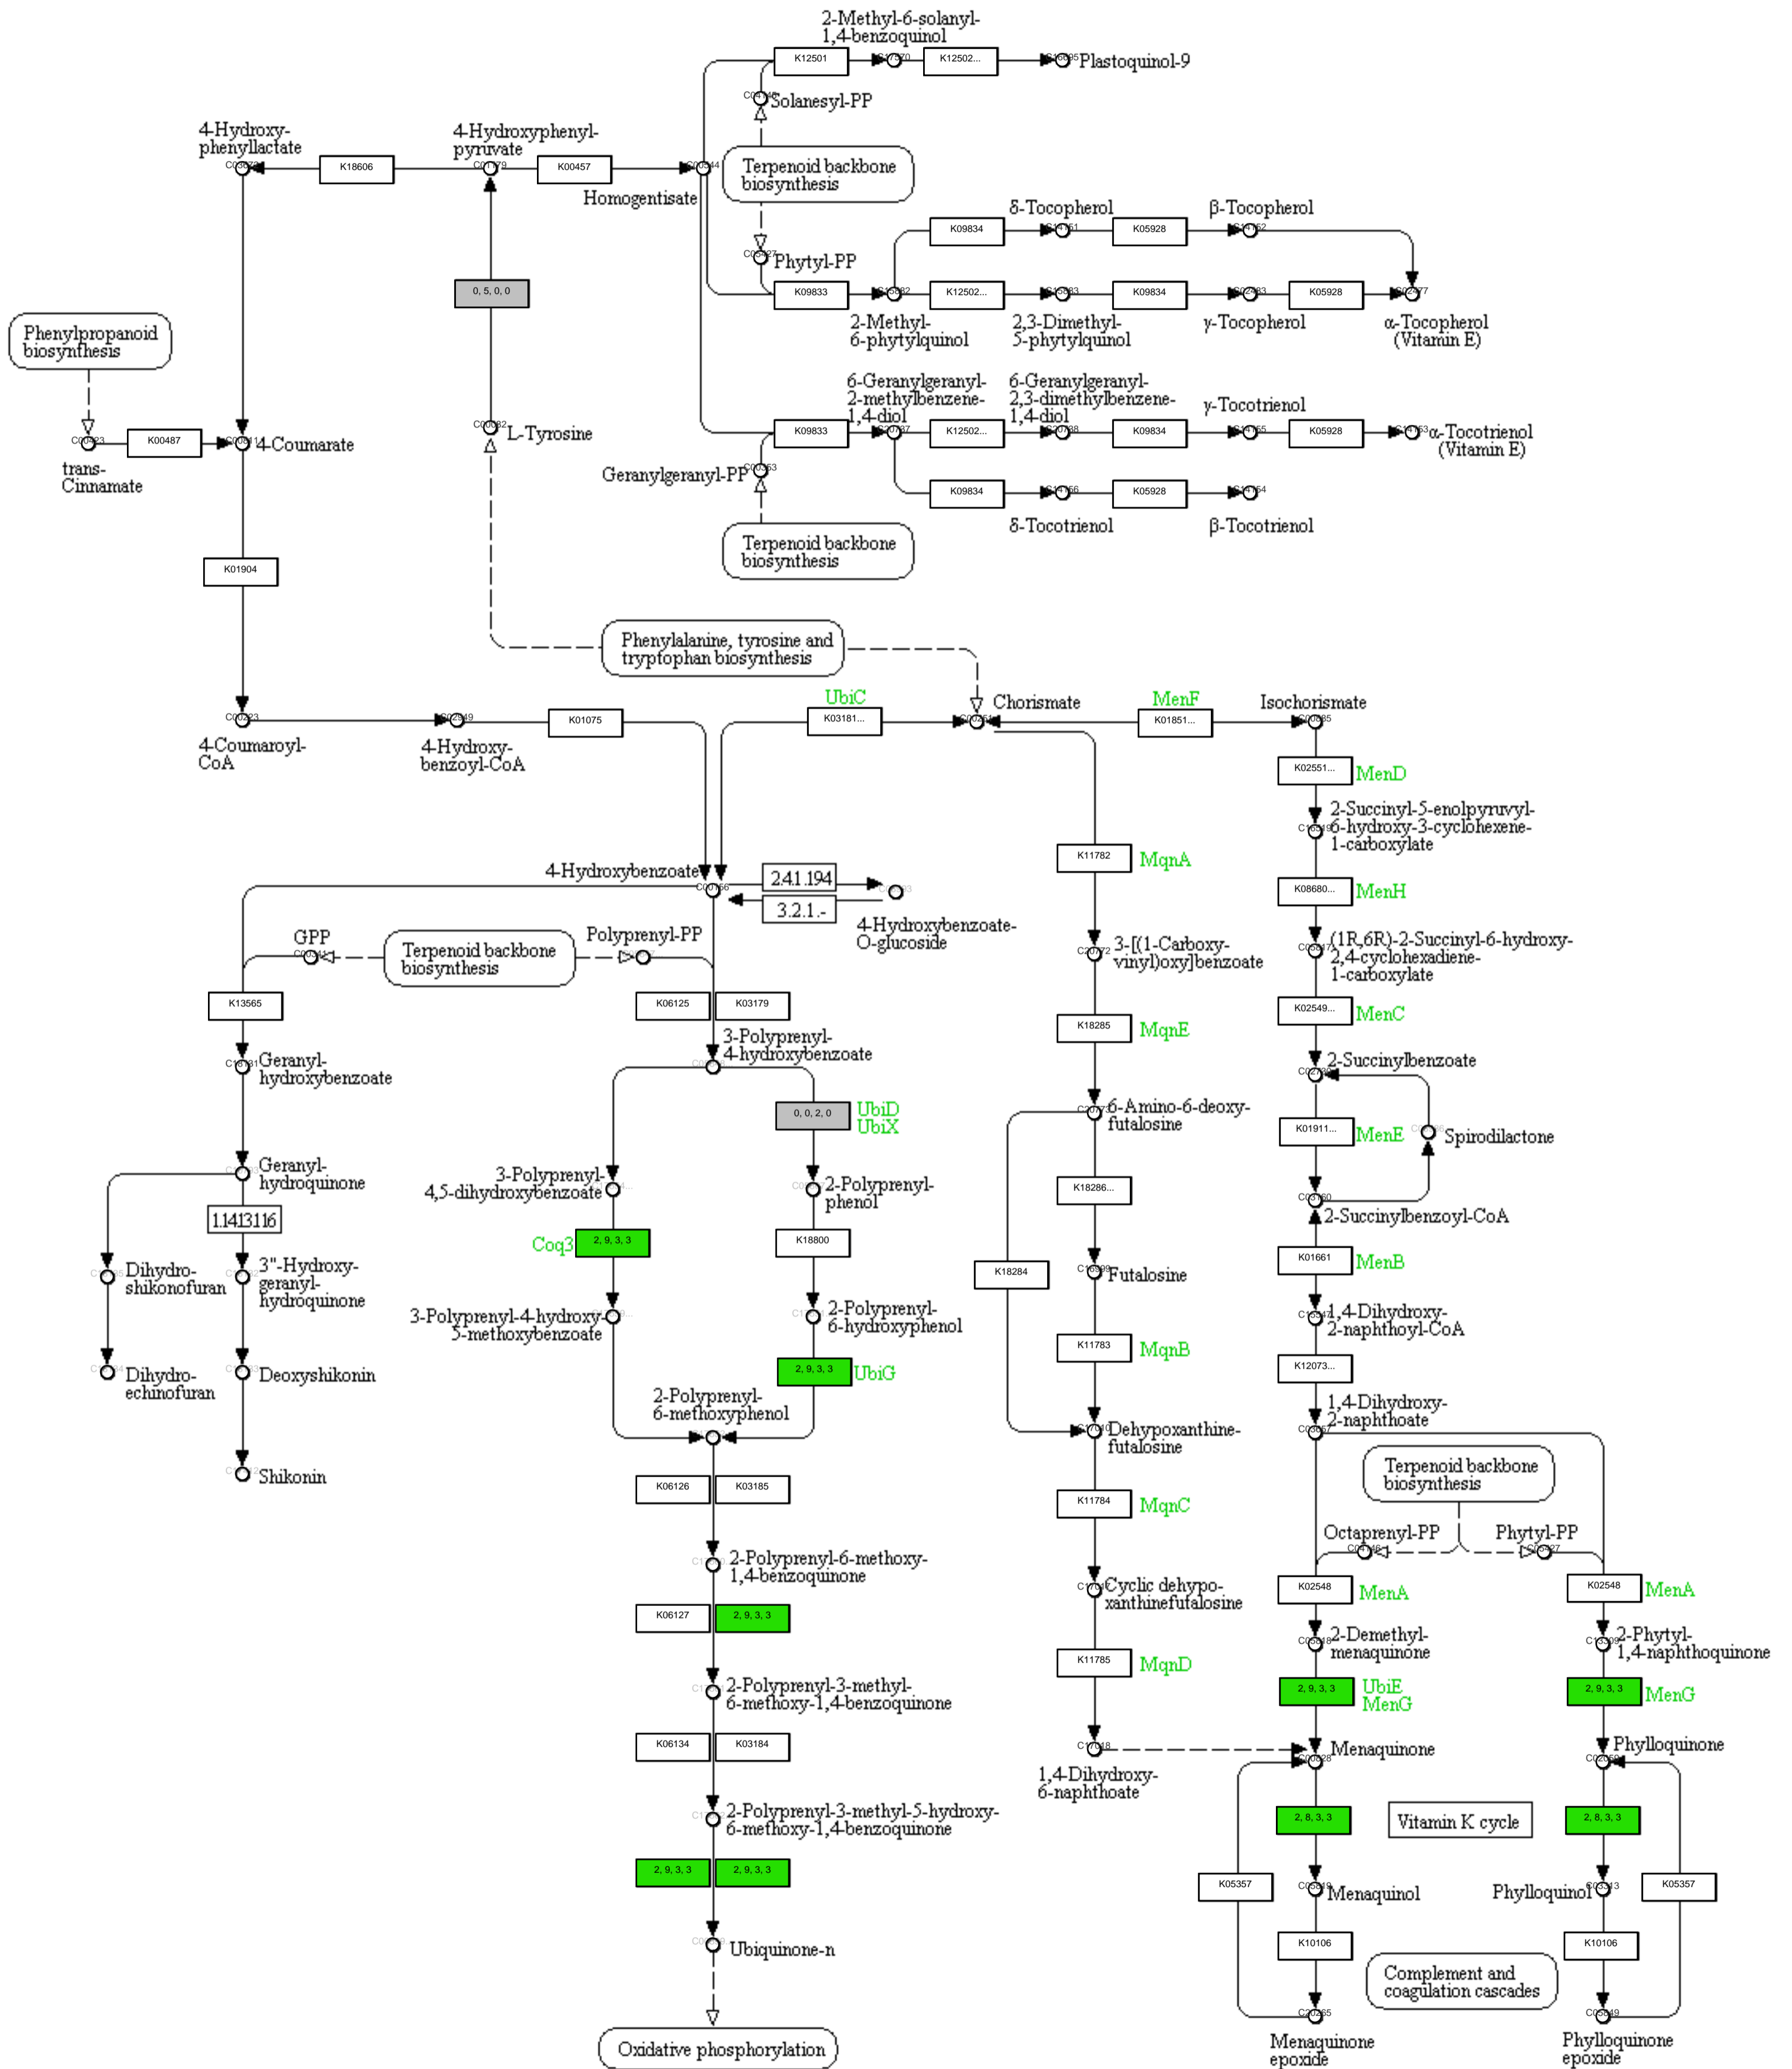

# ONE CARBON POOL BY FOLATE

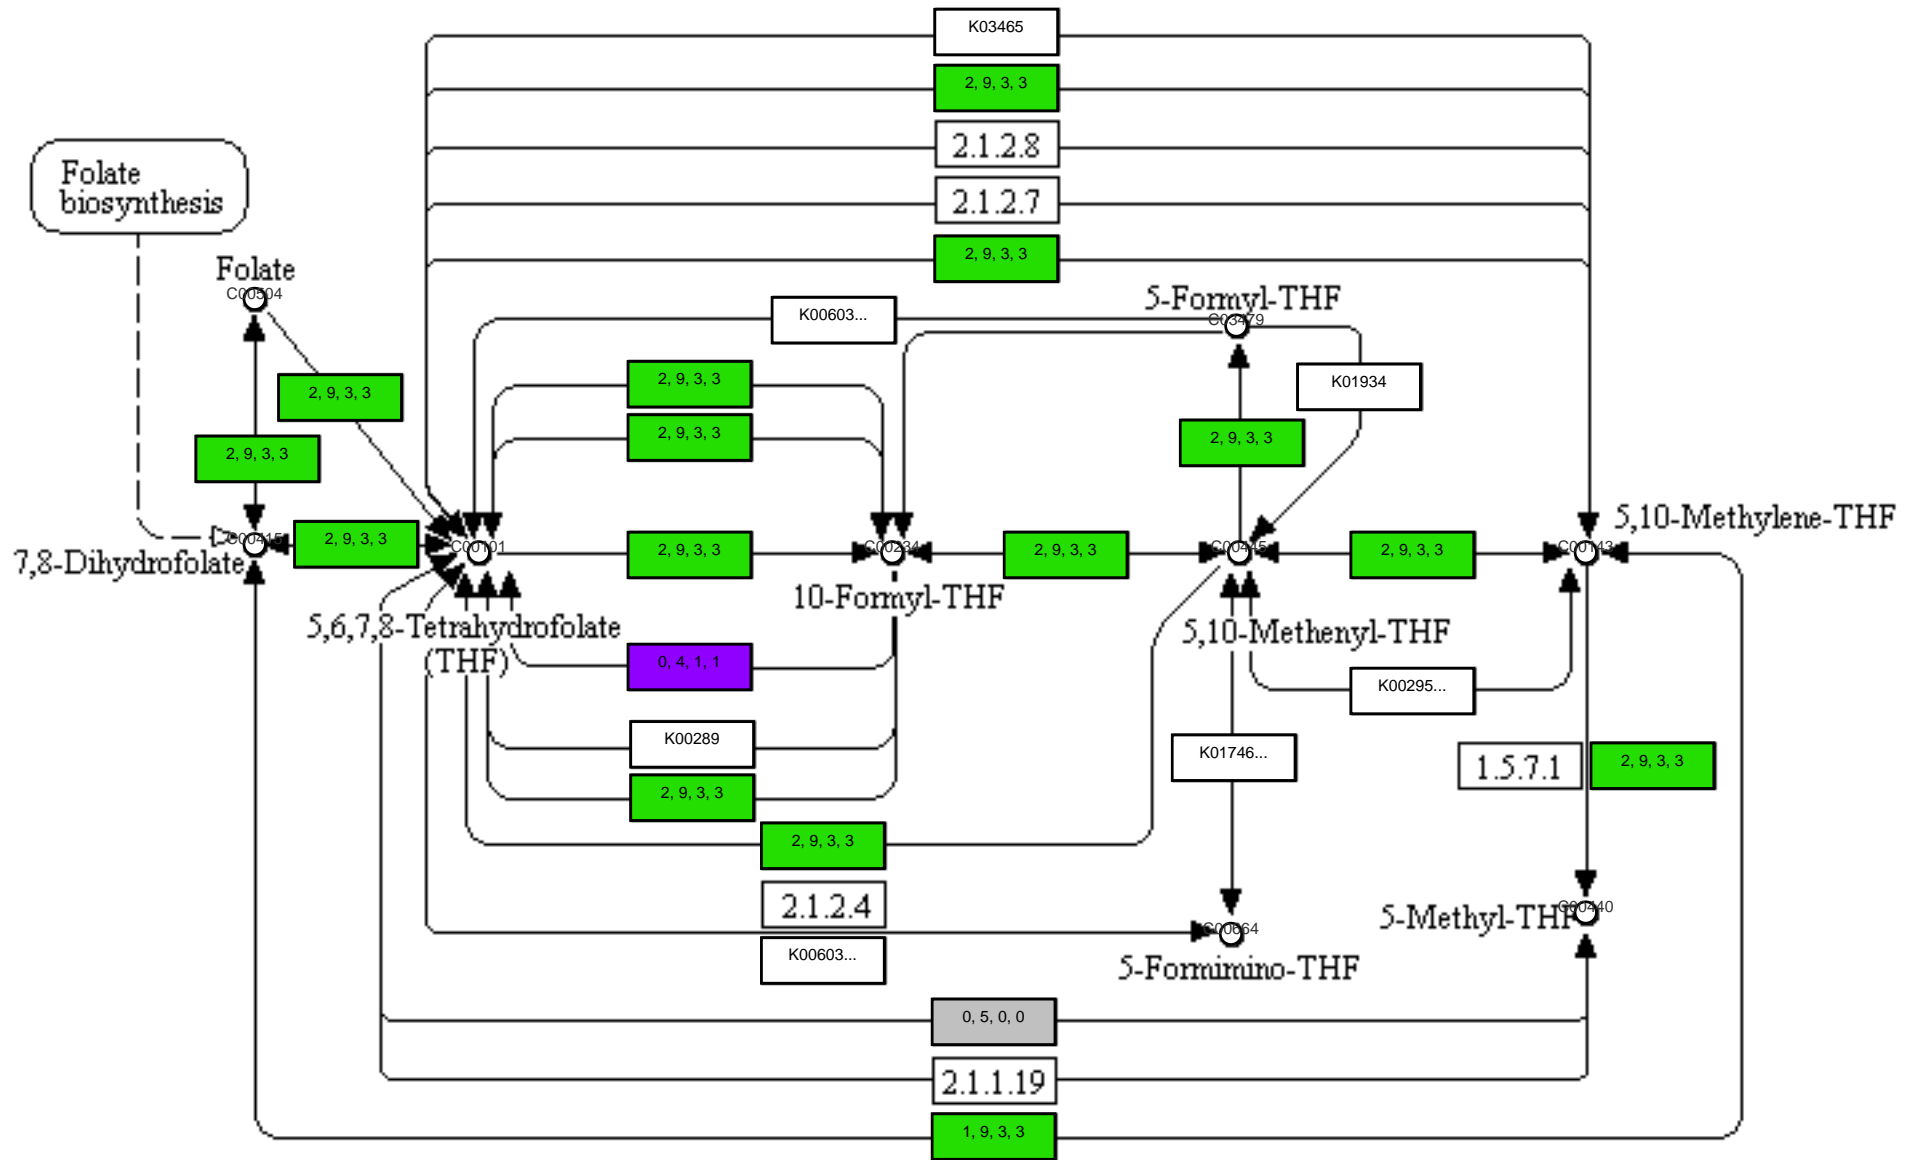





# RIBOFLAVIN METABOLISM

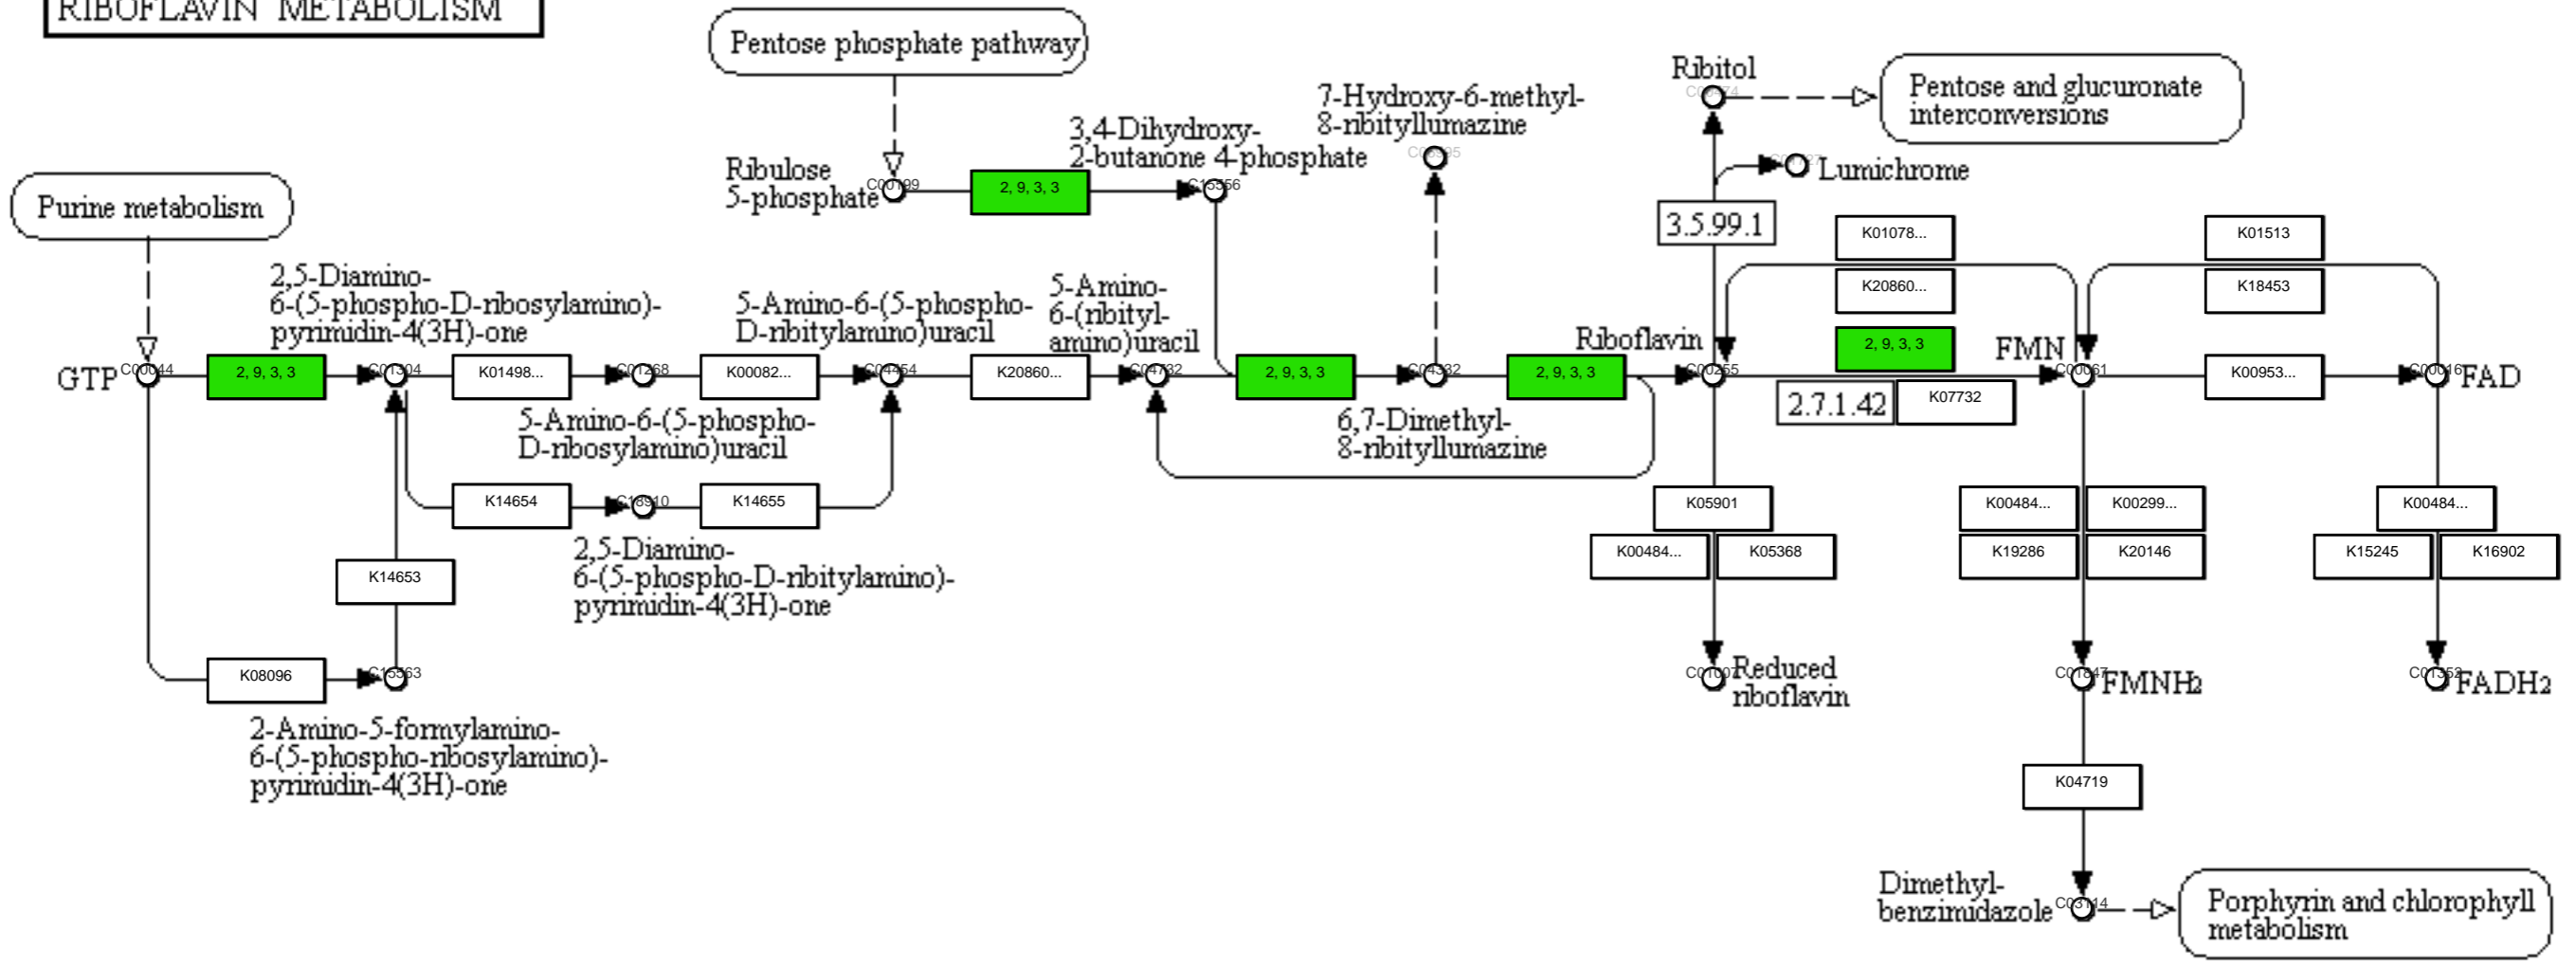

# VITAMIN B 6 METABOLISM

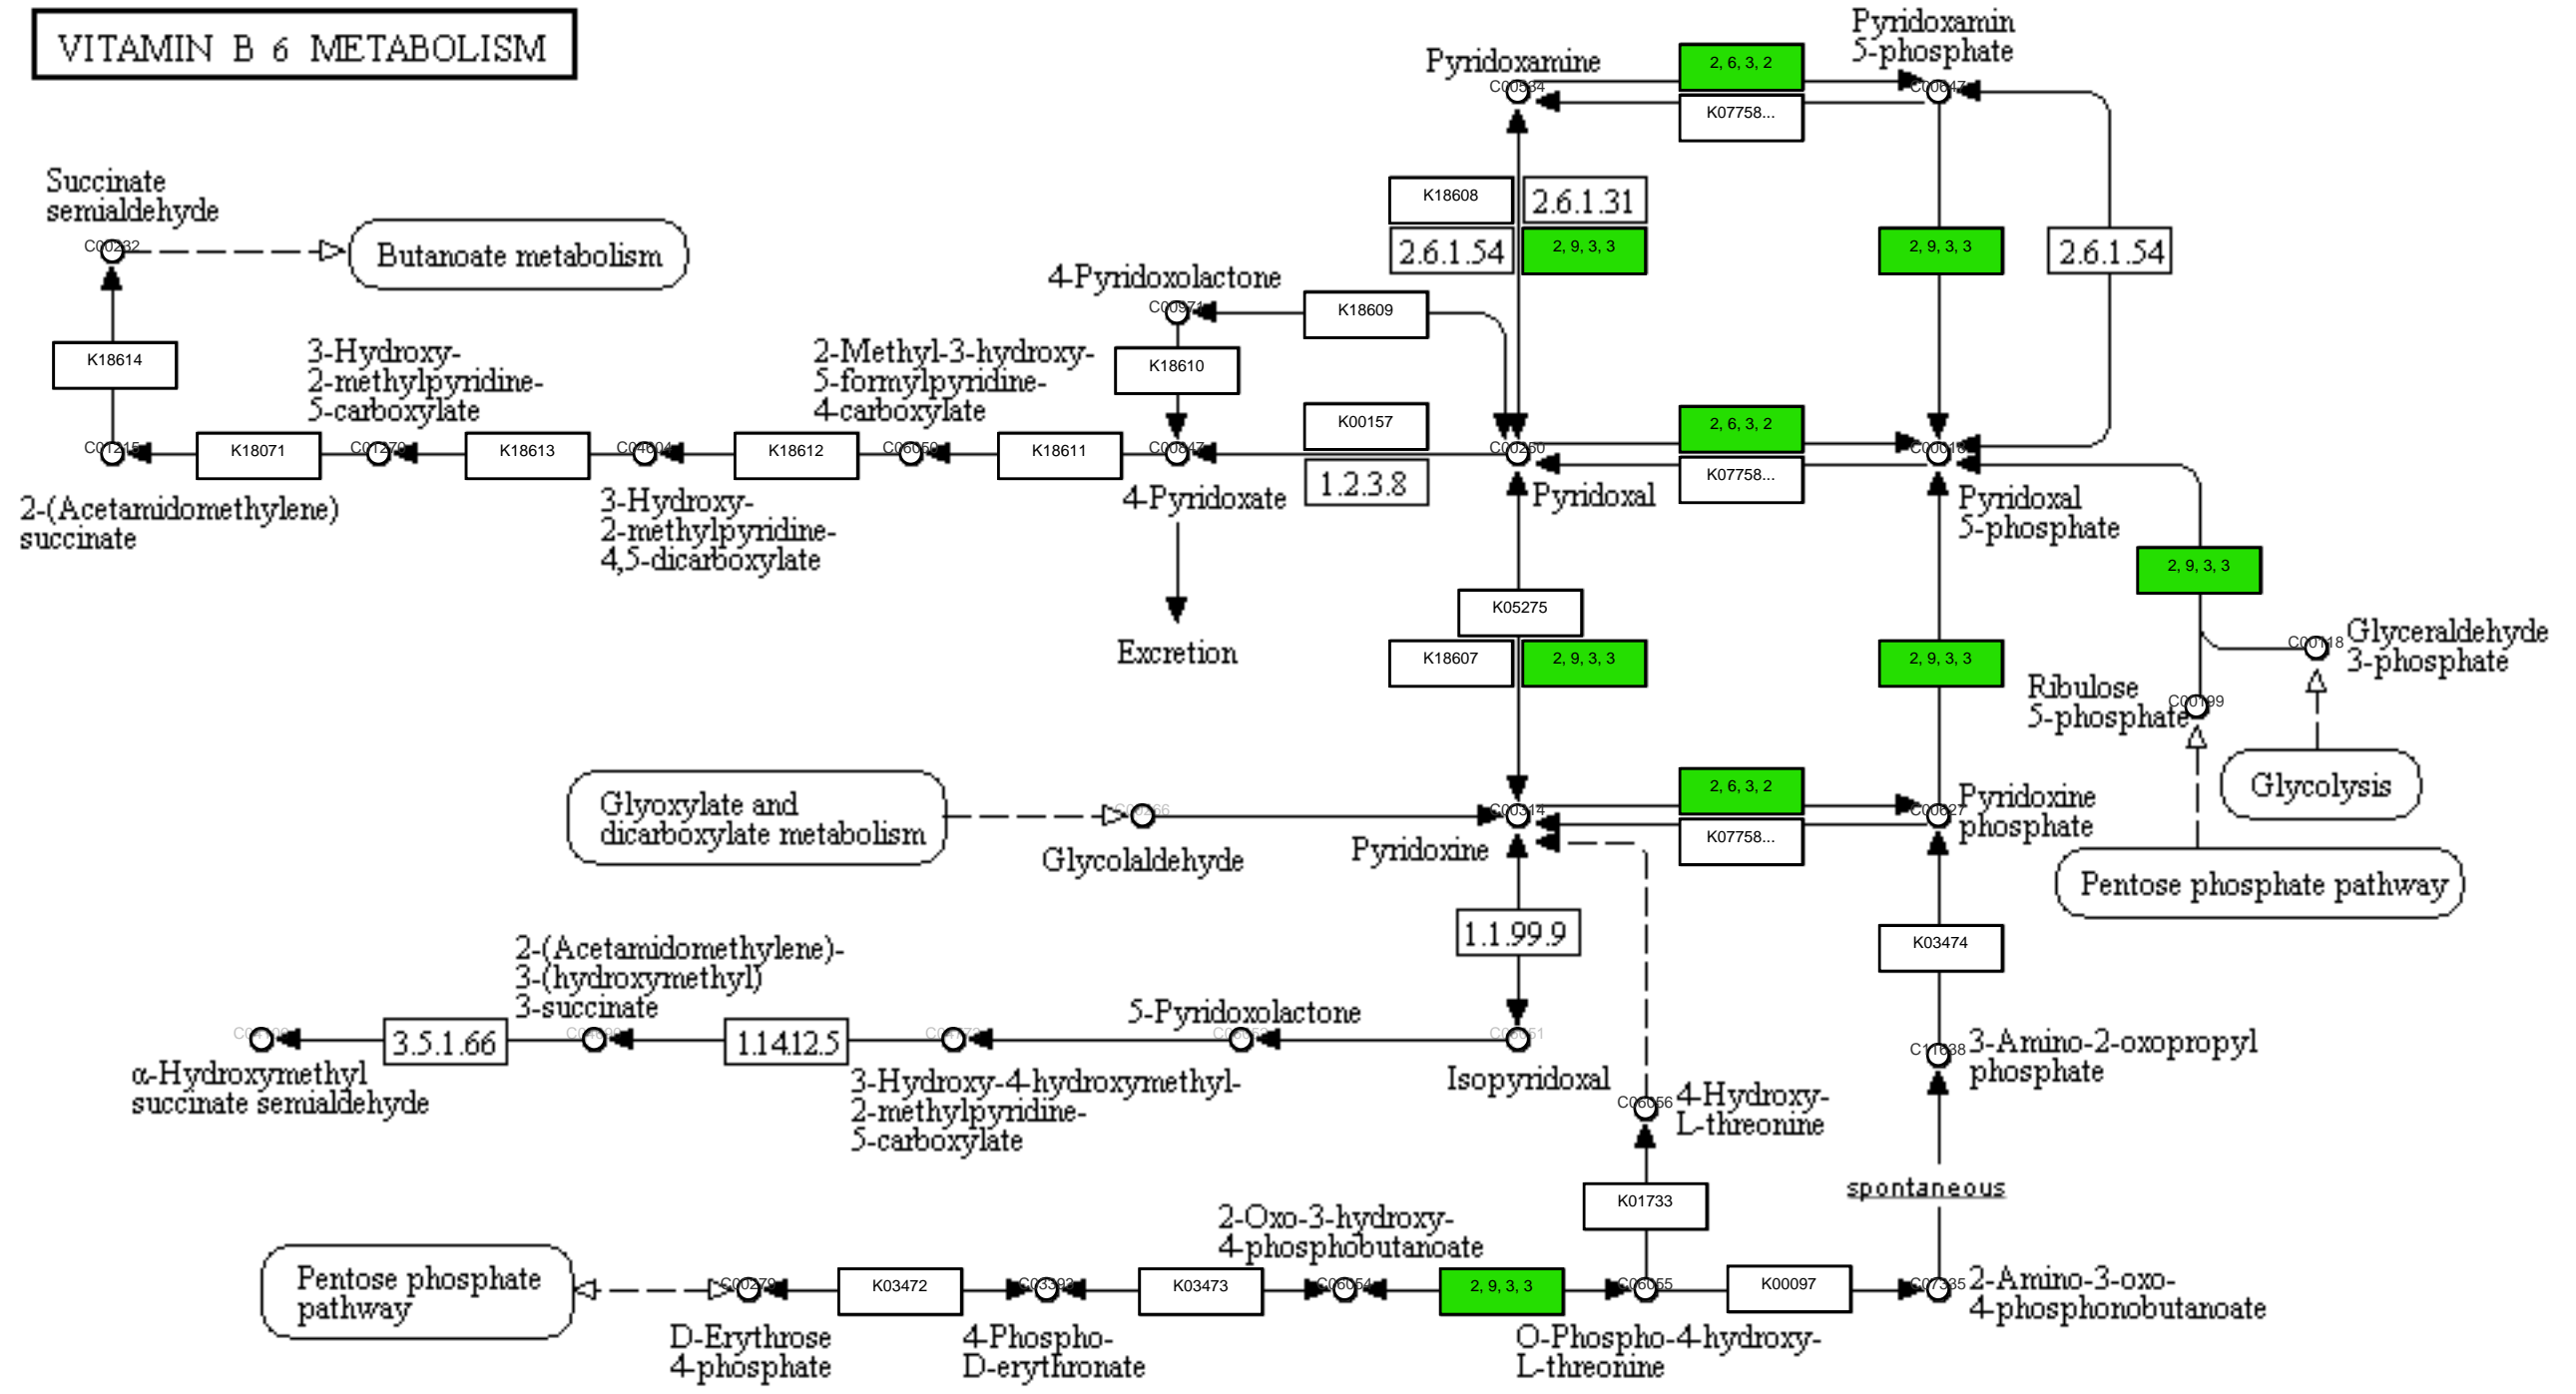





# BIOTIN METABOLISM

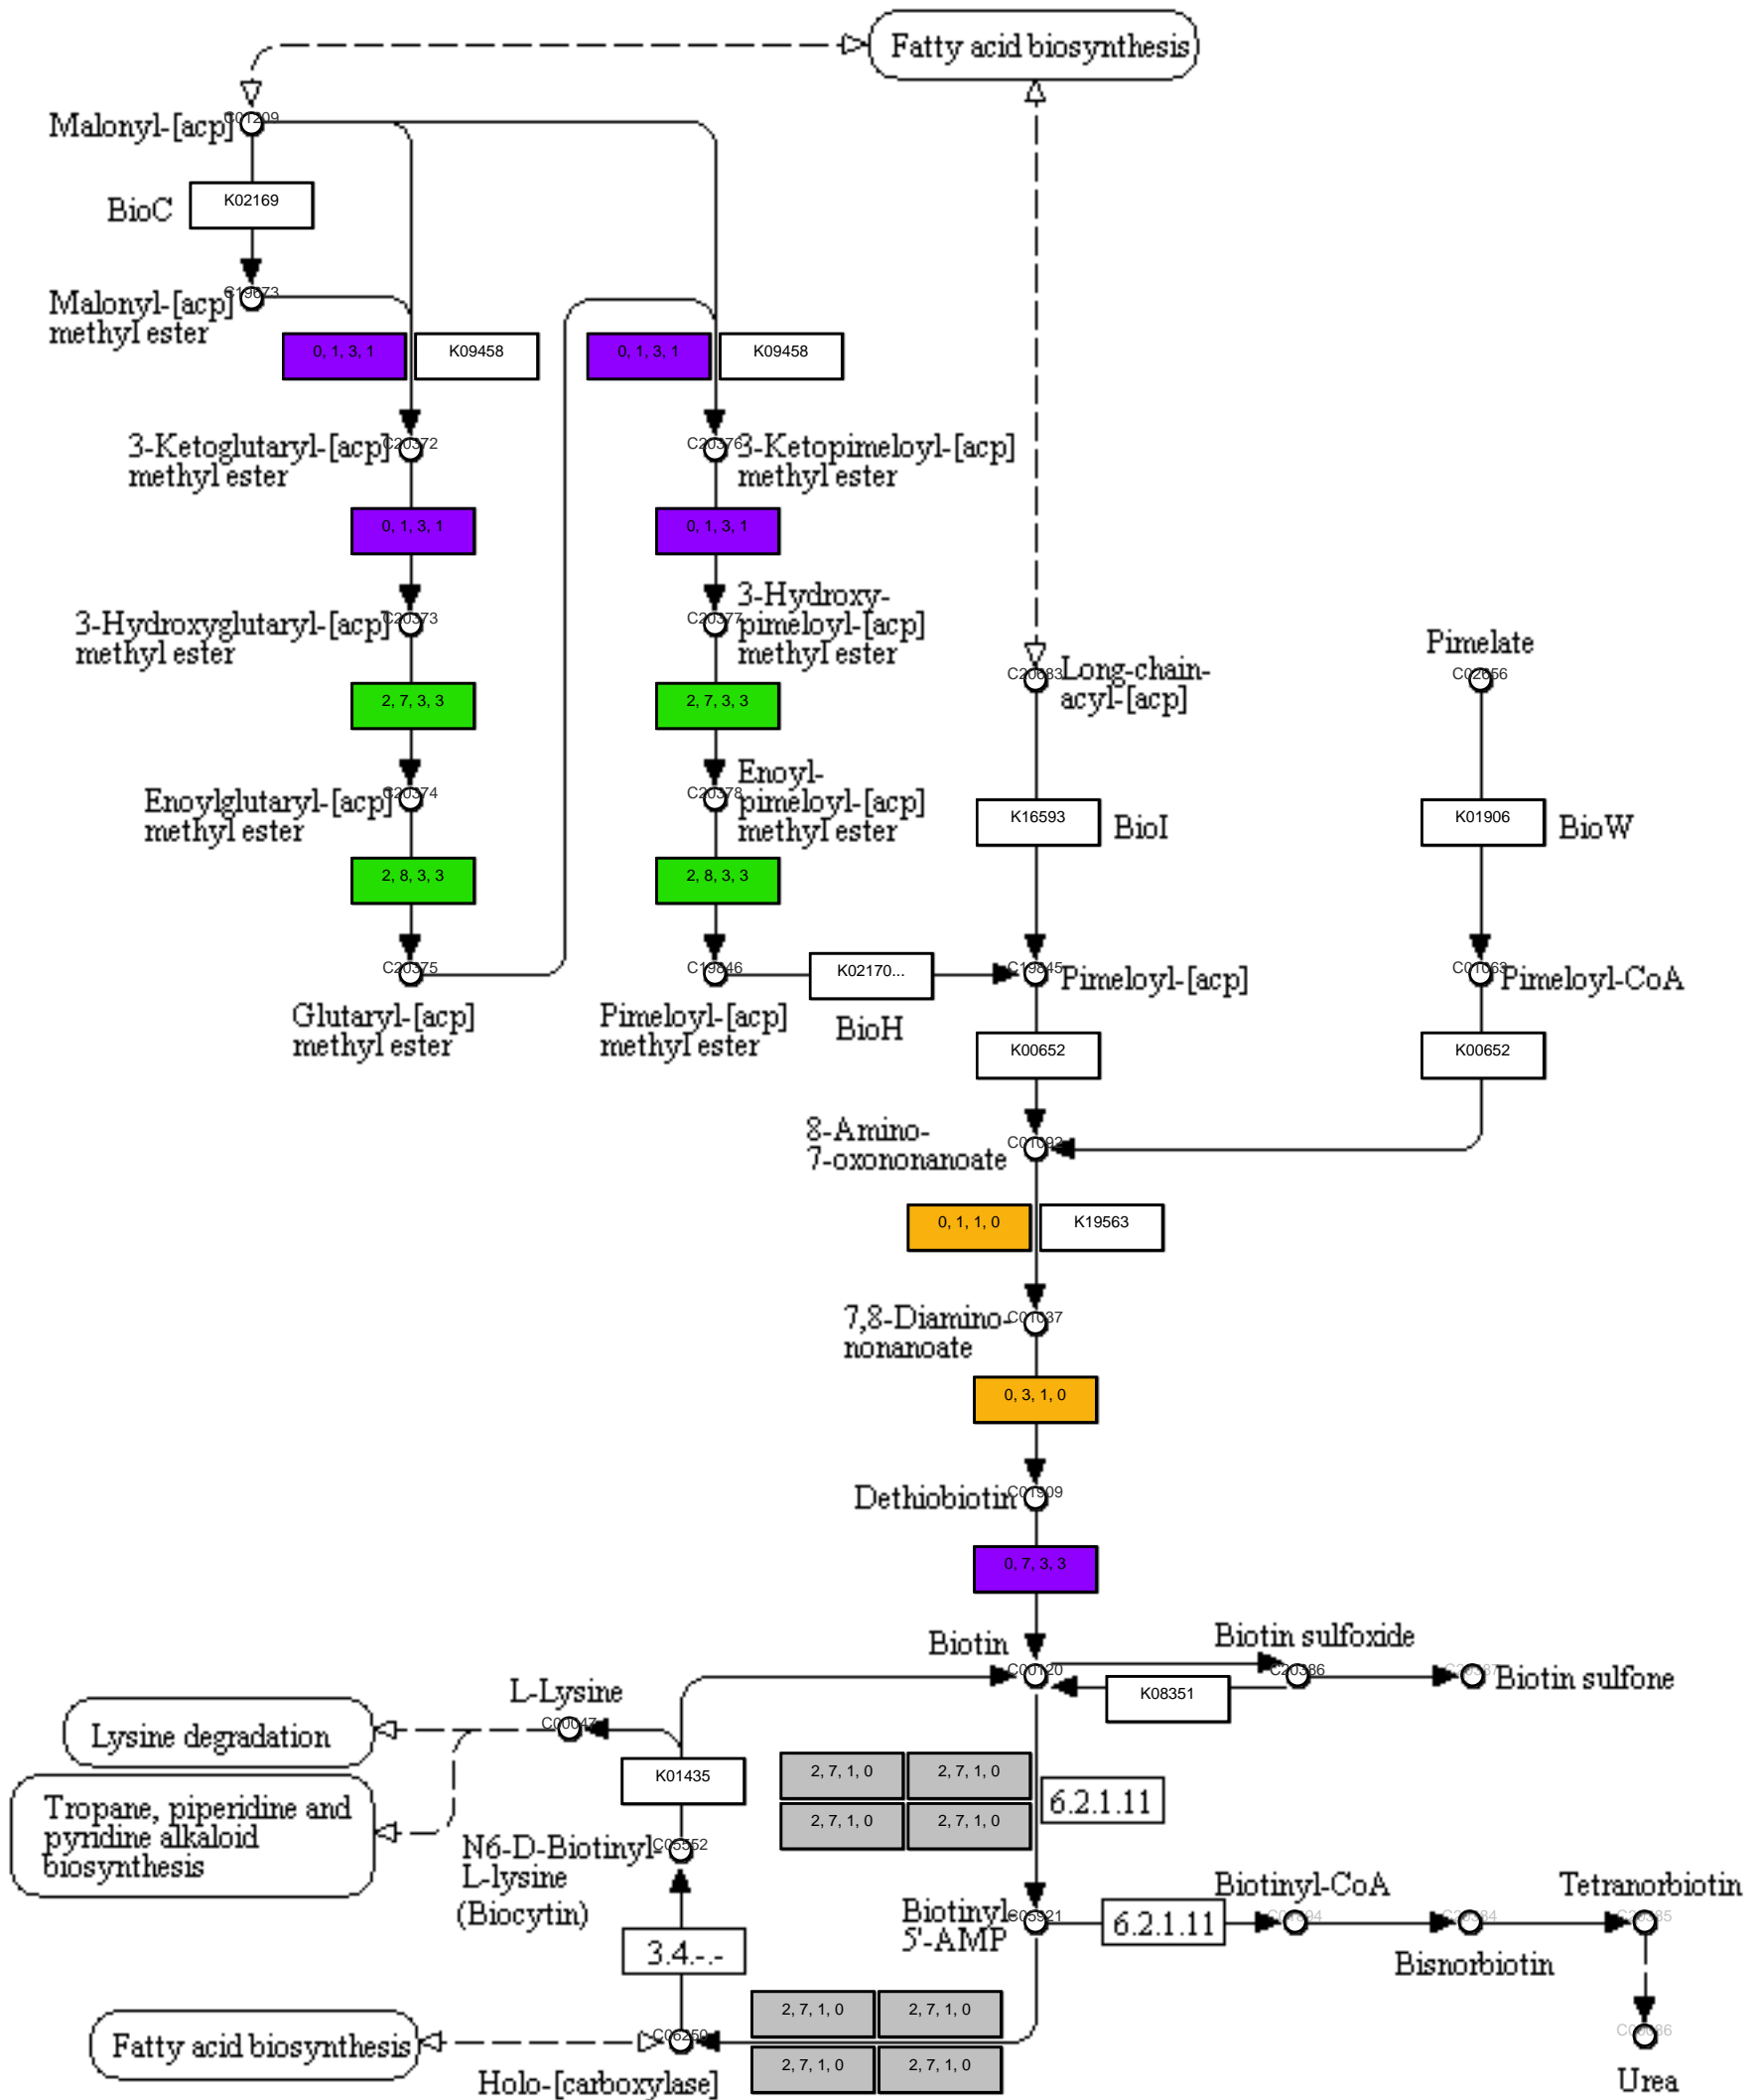



# LIPOIC ACID METABOLISM

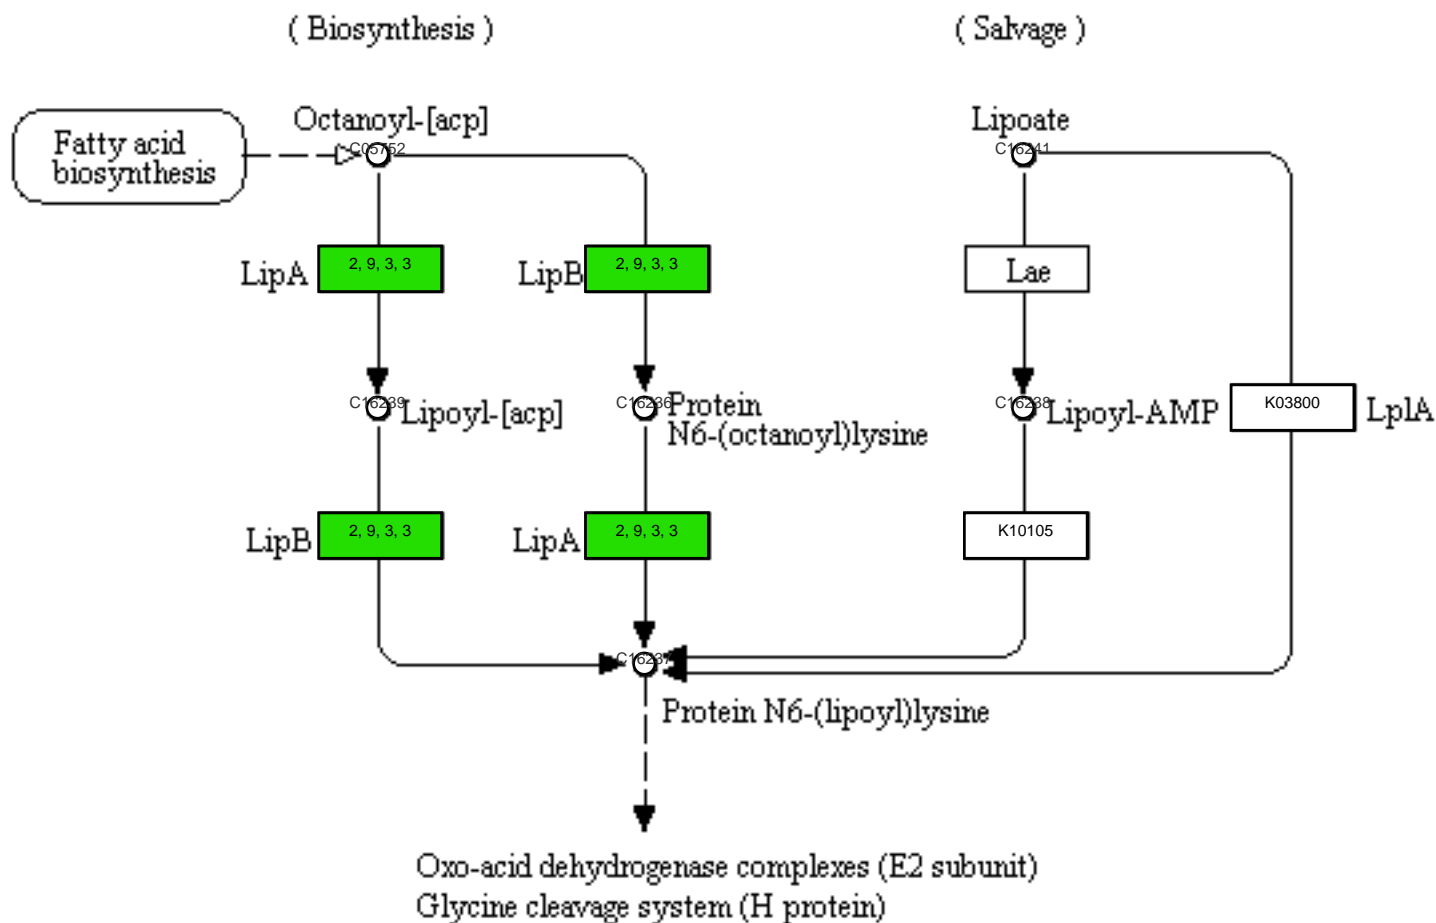



PORPHYRIN AND CHLOROPHYLL METABOLISM

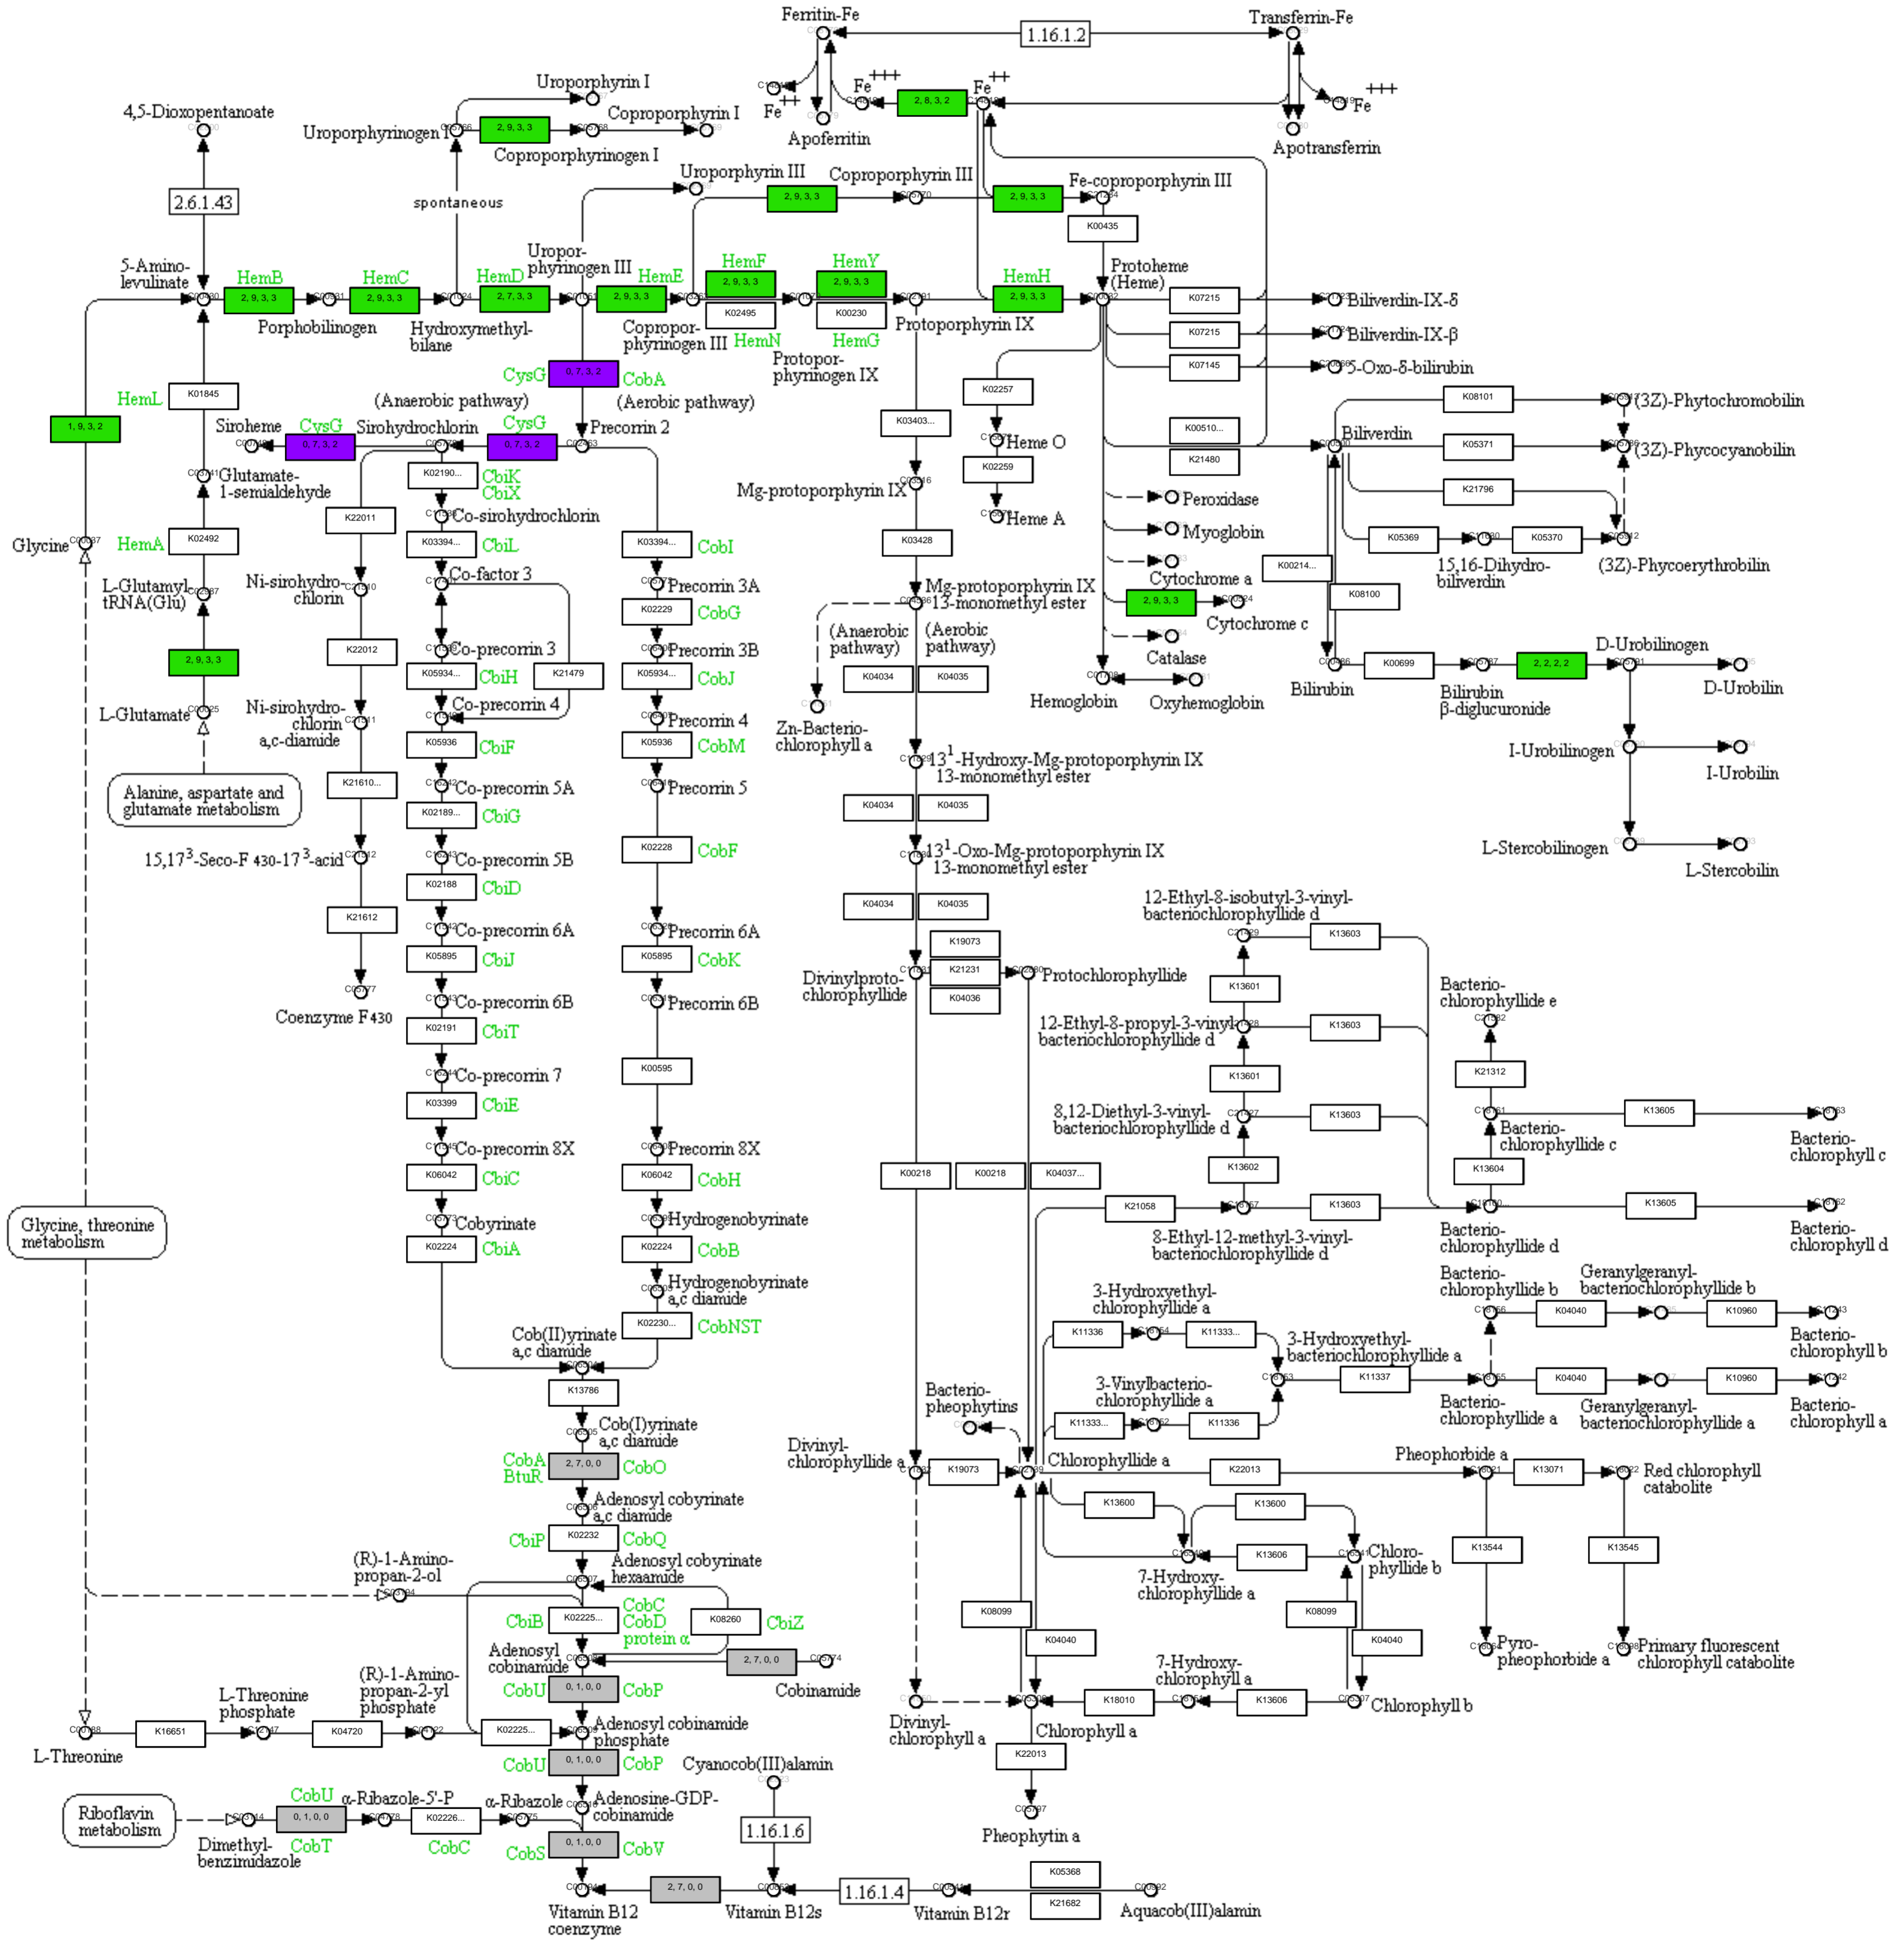

# 9. Metabolism of terpenoids and polyketides

| MAP        | PATHWAY                                       |
|------------|-----------------------------------------------|
| <b>900</b> | Terpenoid backbone biosynthesis               |
| <b>909</b> | Sesquiterpenoid and triterpenoid biosynthesis |

TERPENOID BACKBONE BIOSYNTHESIS

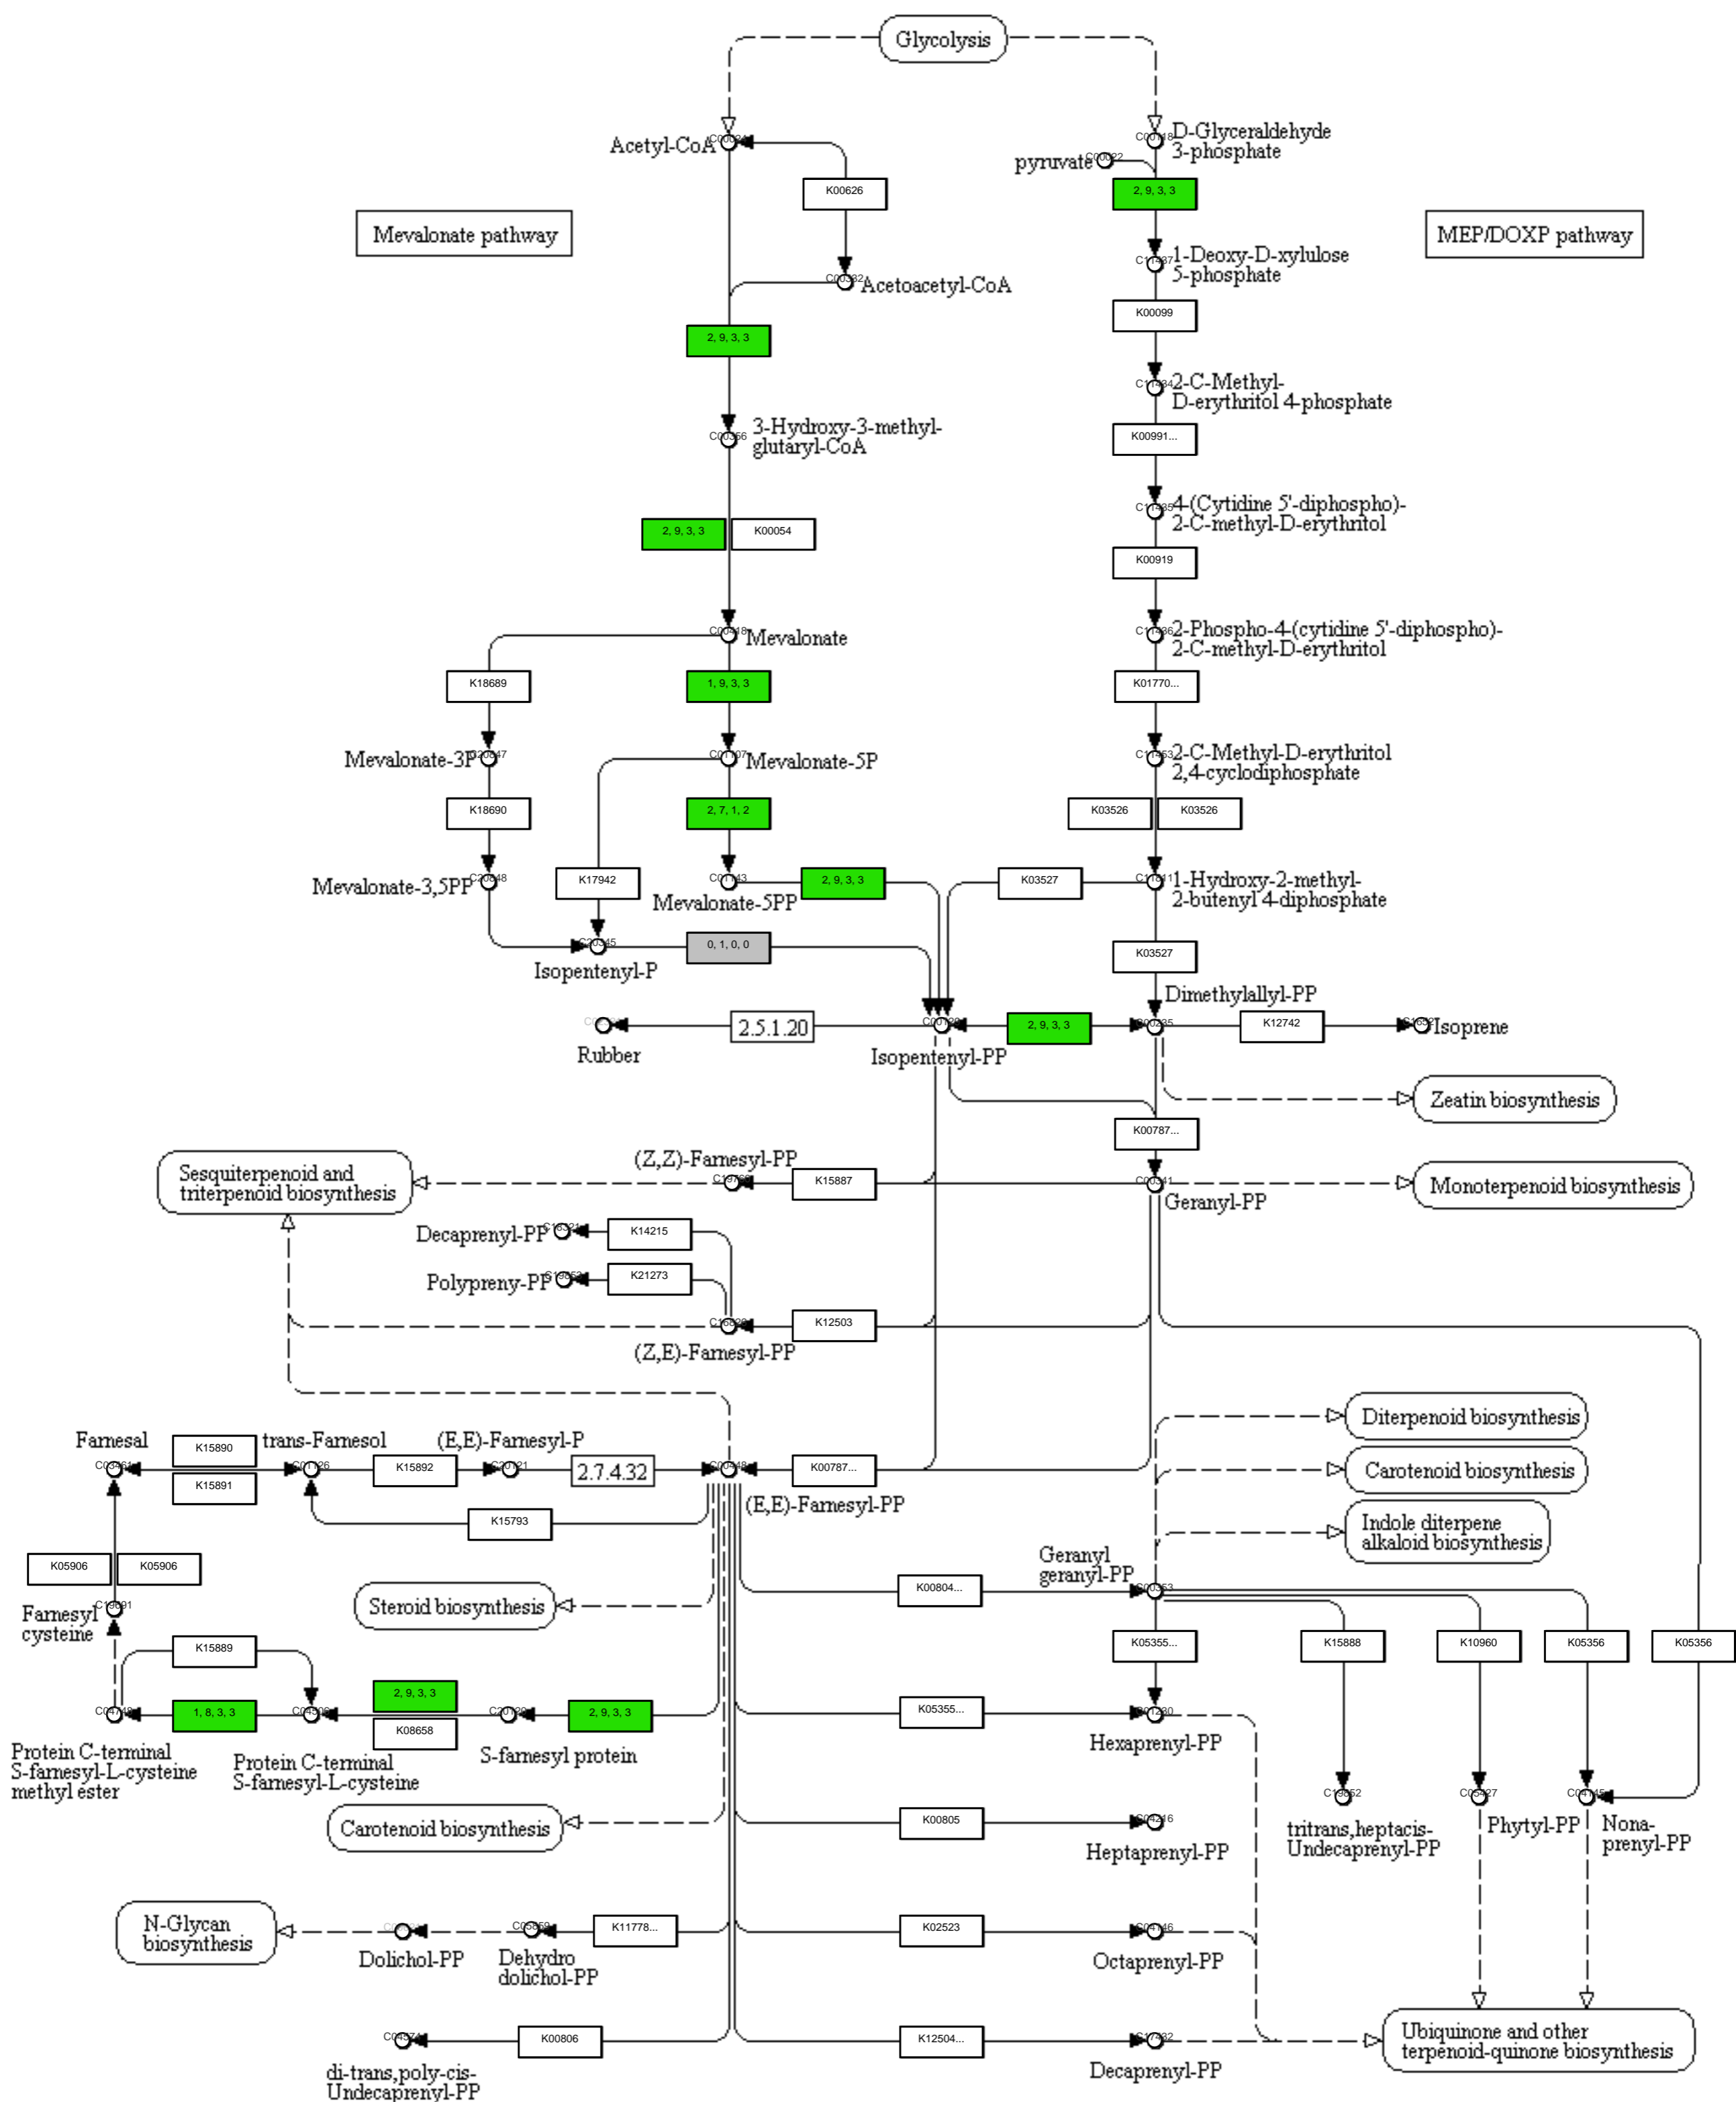



SESQUITERPENOID AND TRITERPENOID BIOSYNTHESIS

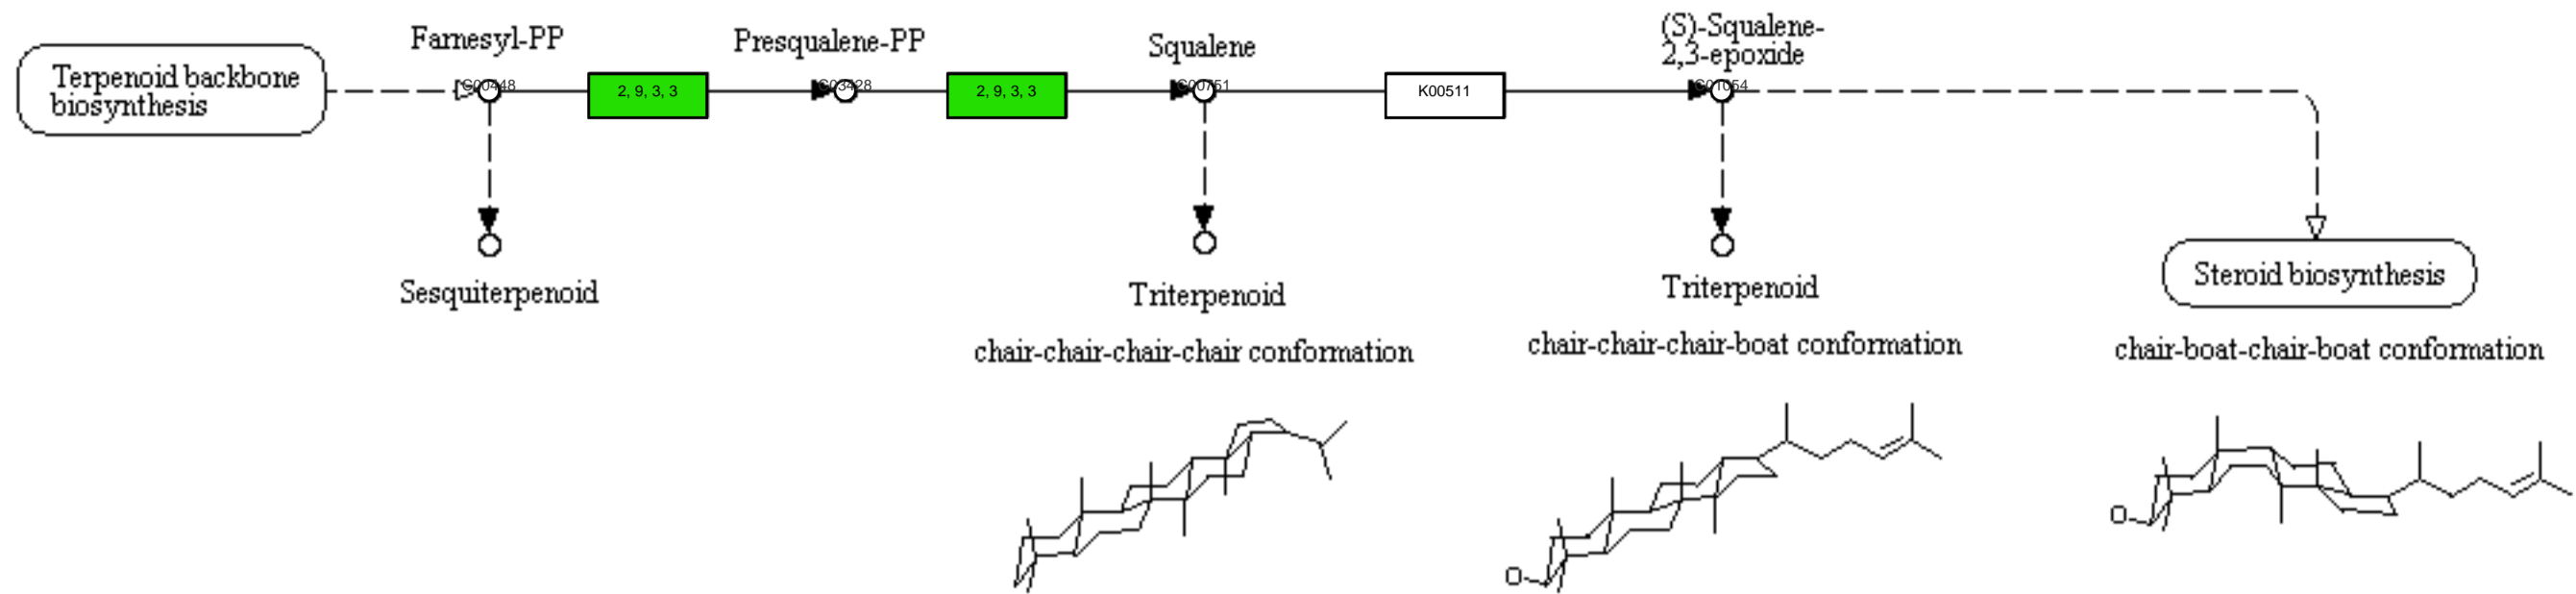

Sesquiterpenoid

Acyclic sesquiterpenoid

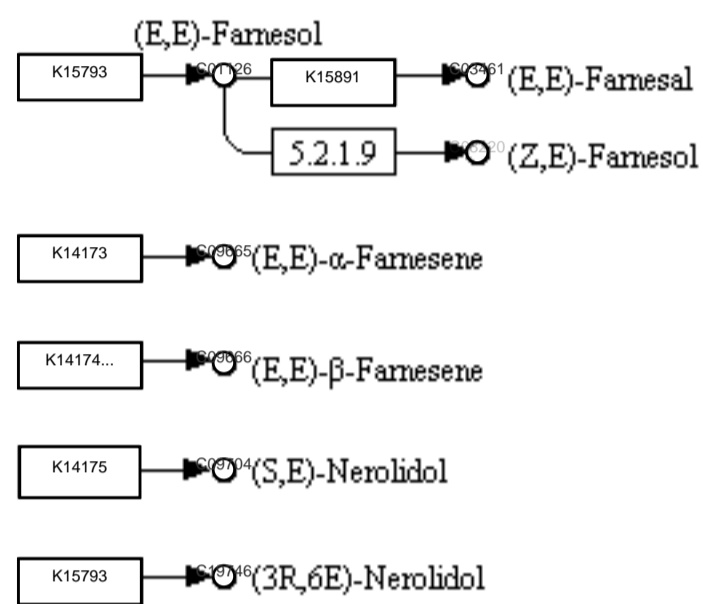

Bisabolene-type

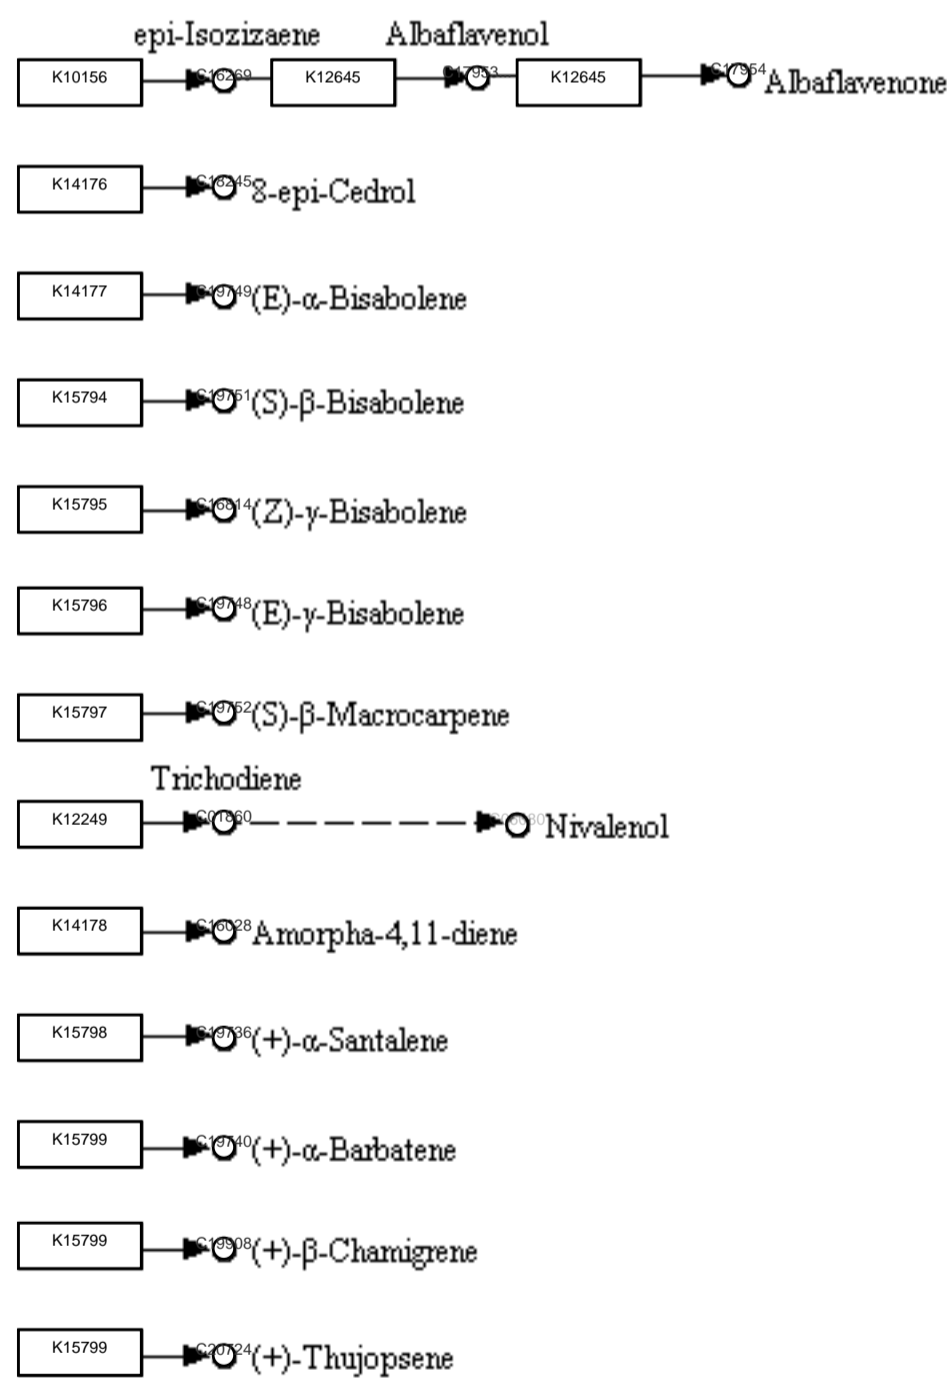

Germacren-type

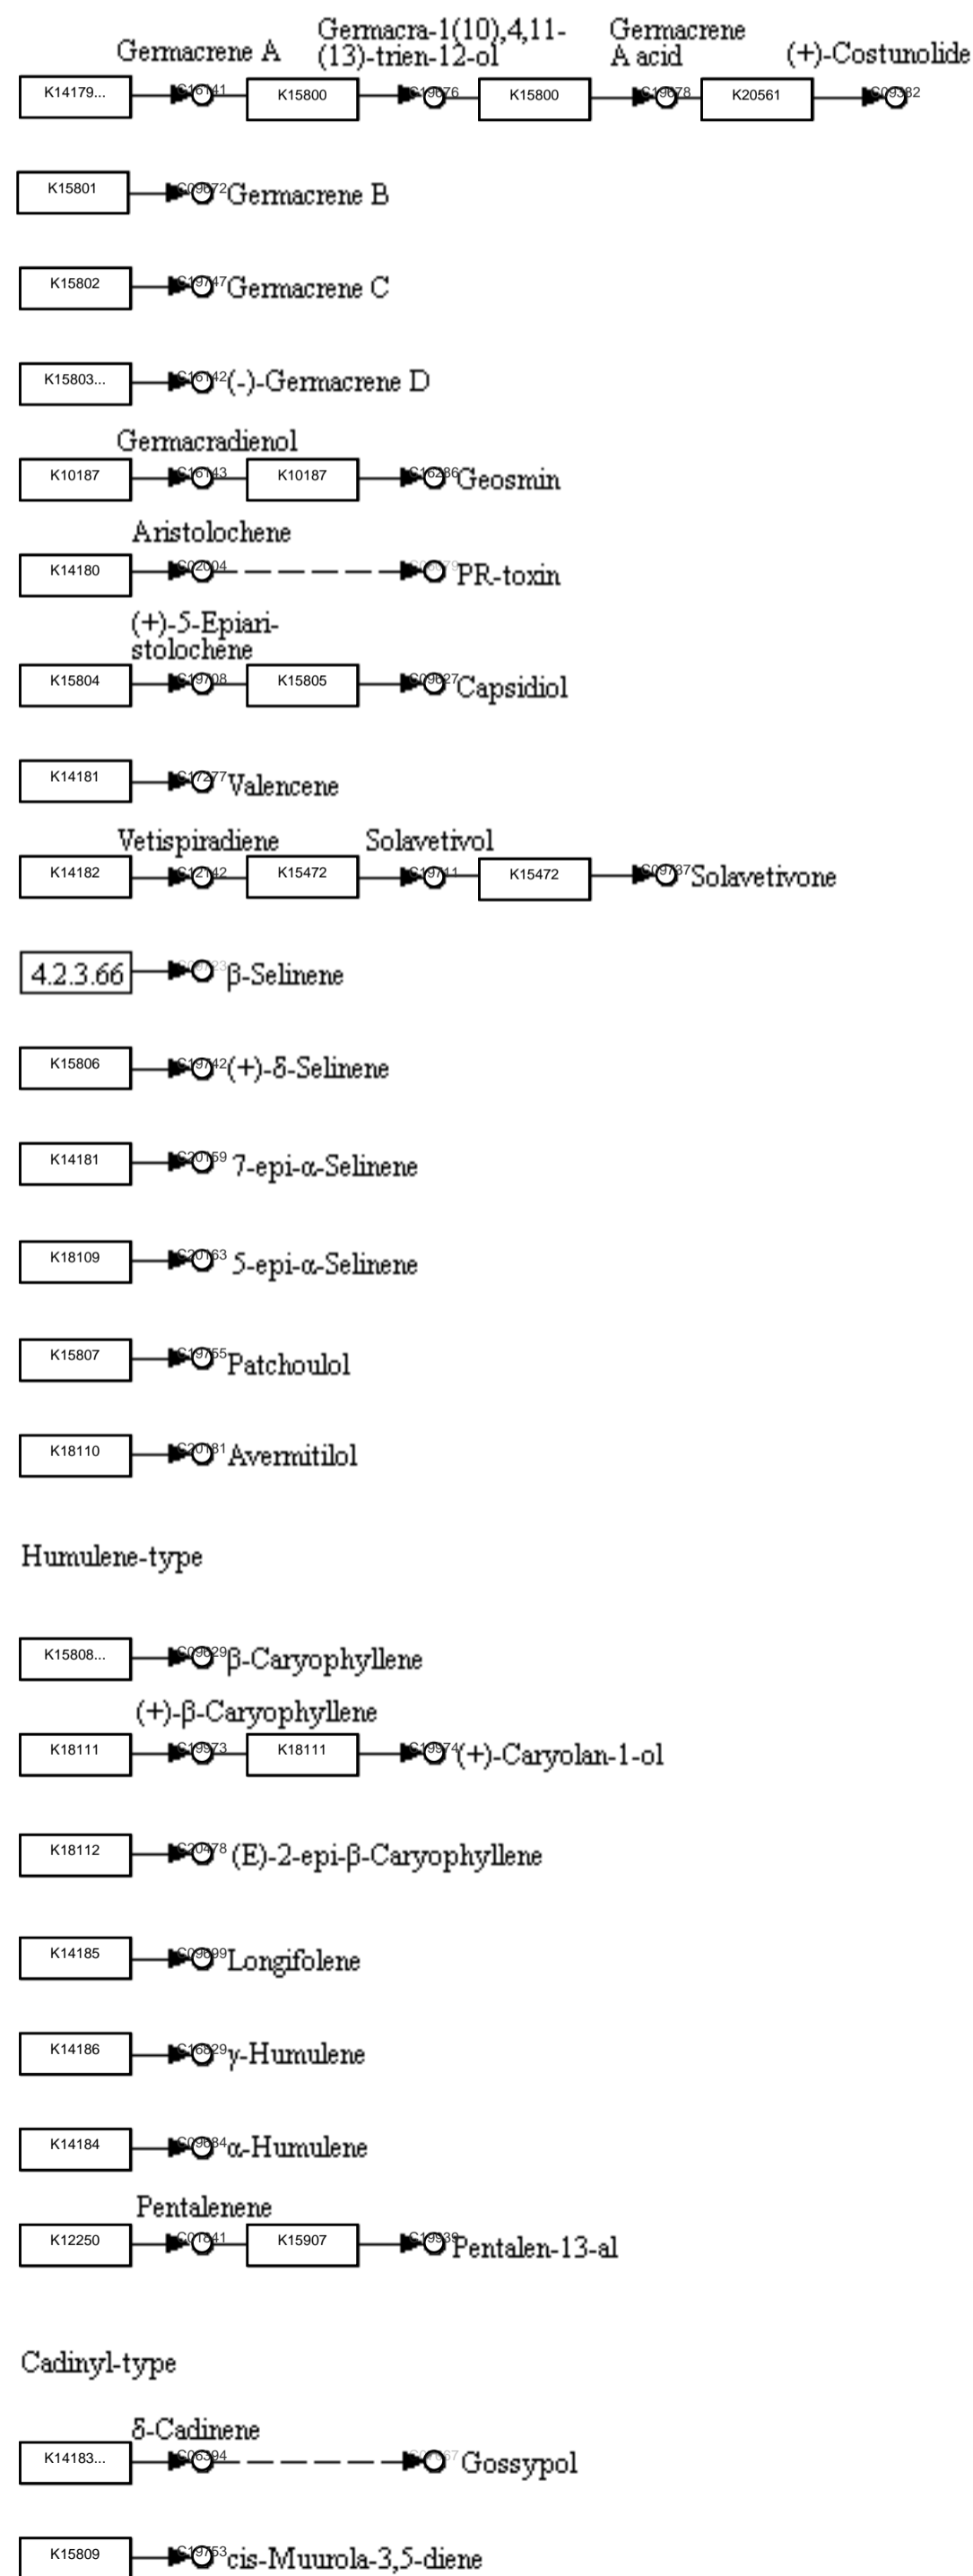

Triterpenoid chair-chair-chair-chair conformation

Hopene and Tetrahymanol

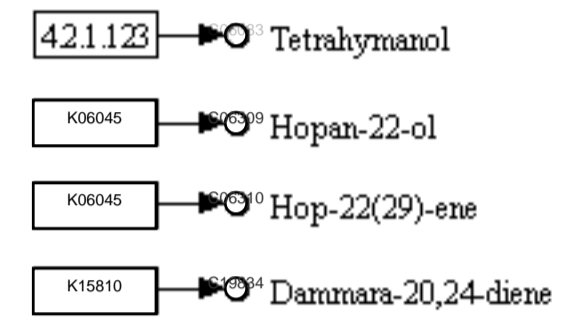

Triterpenoid chair-chair-chair-boat conformation

Protosteryl-type

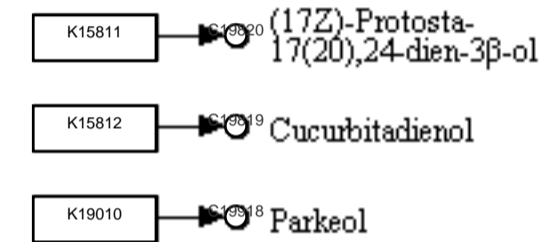

Dammarenyl-type

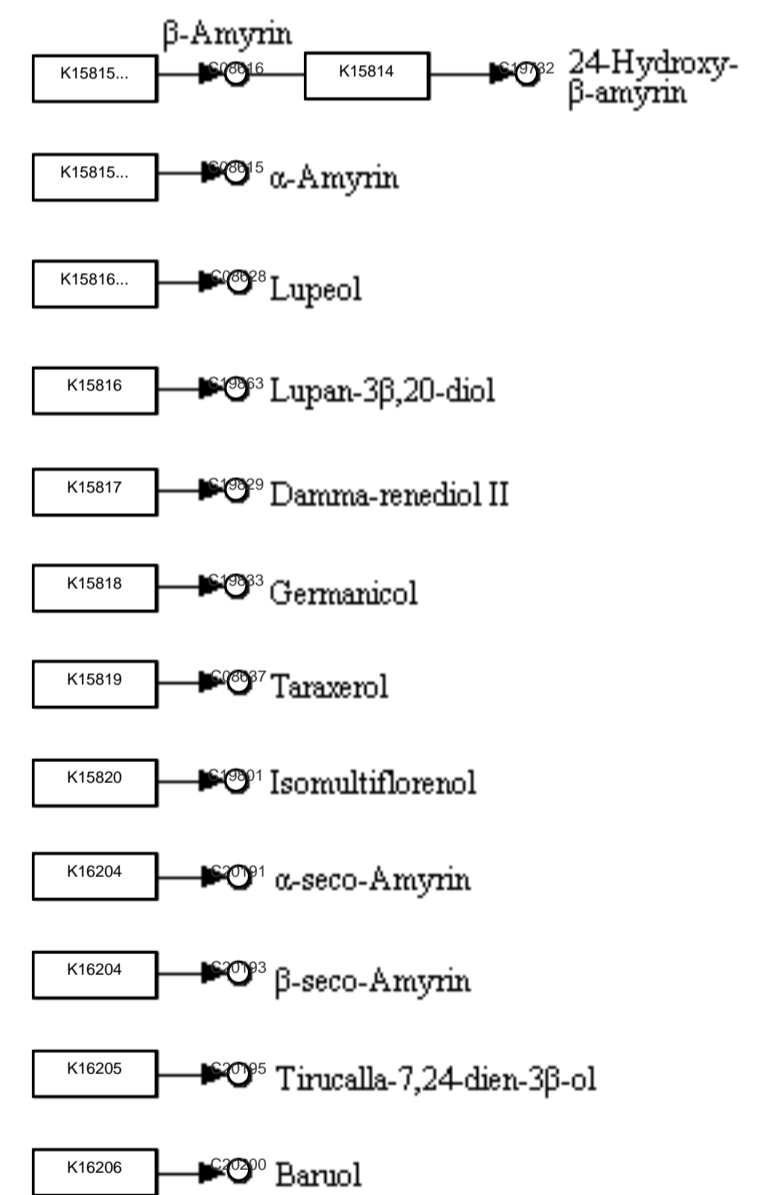

Other-type

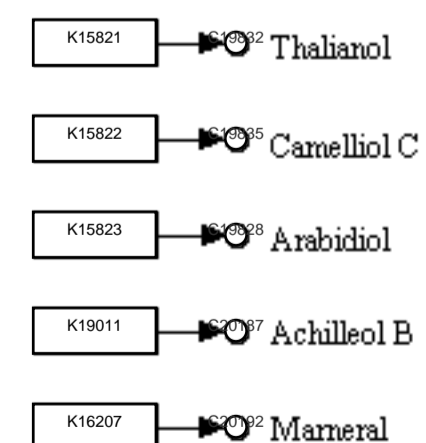



# 10. Biosynthesis of other secondary metabolites

| MAP | PATHWAY                 |
|-----|-------------------------|
| 261 | Monobactam biosynthesis |
| 332 | Carbapenem biosynthesis |



# CARBAPENEM BIOSYNTHESIS

Arginine and proline metabolism

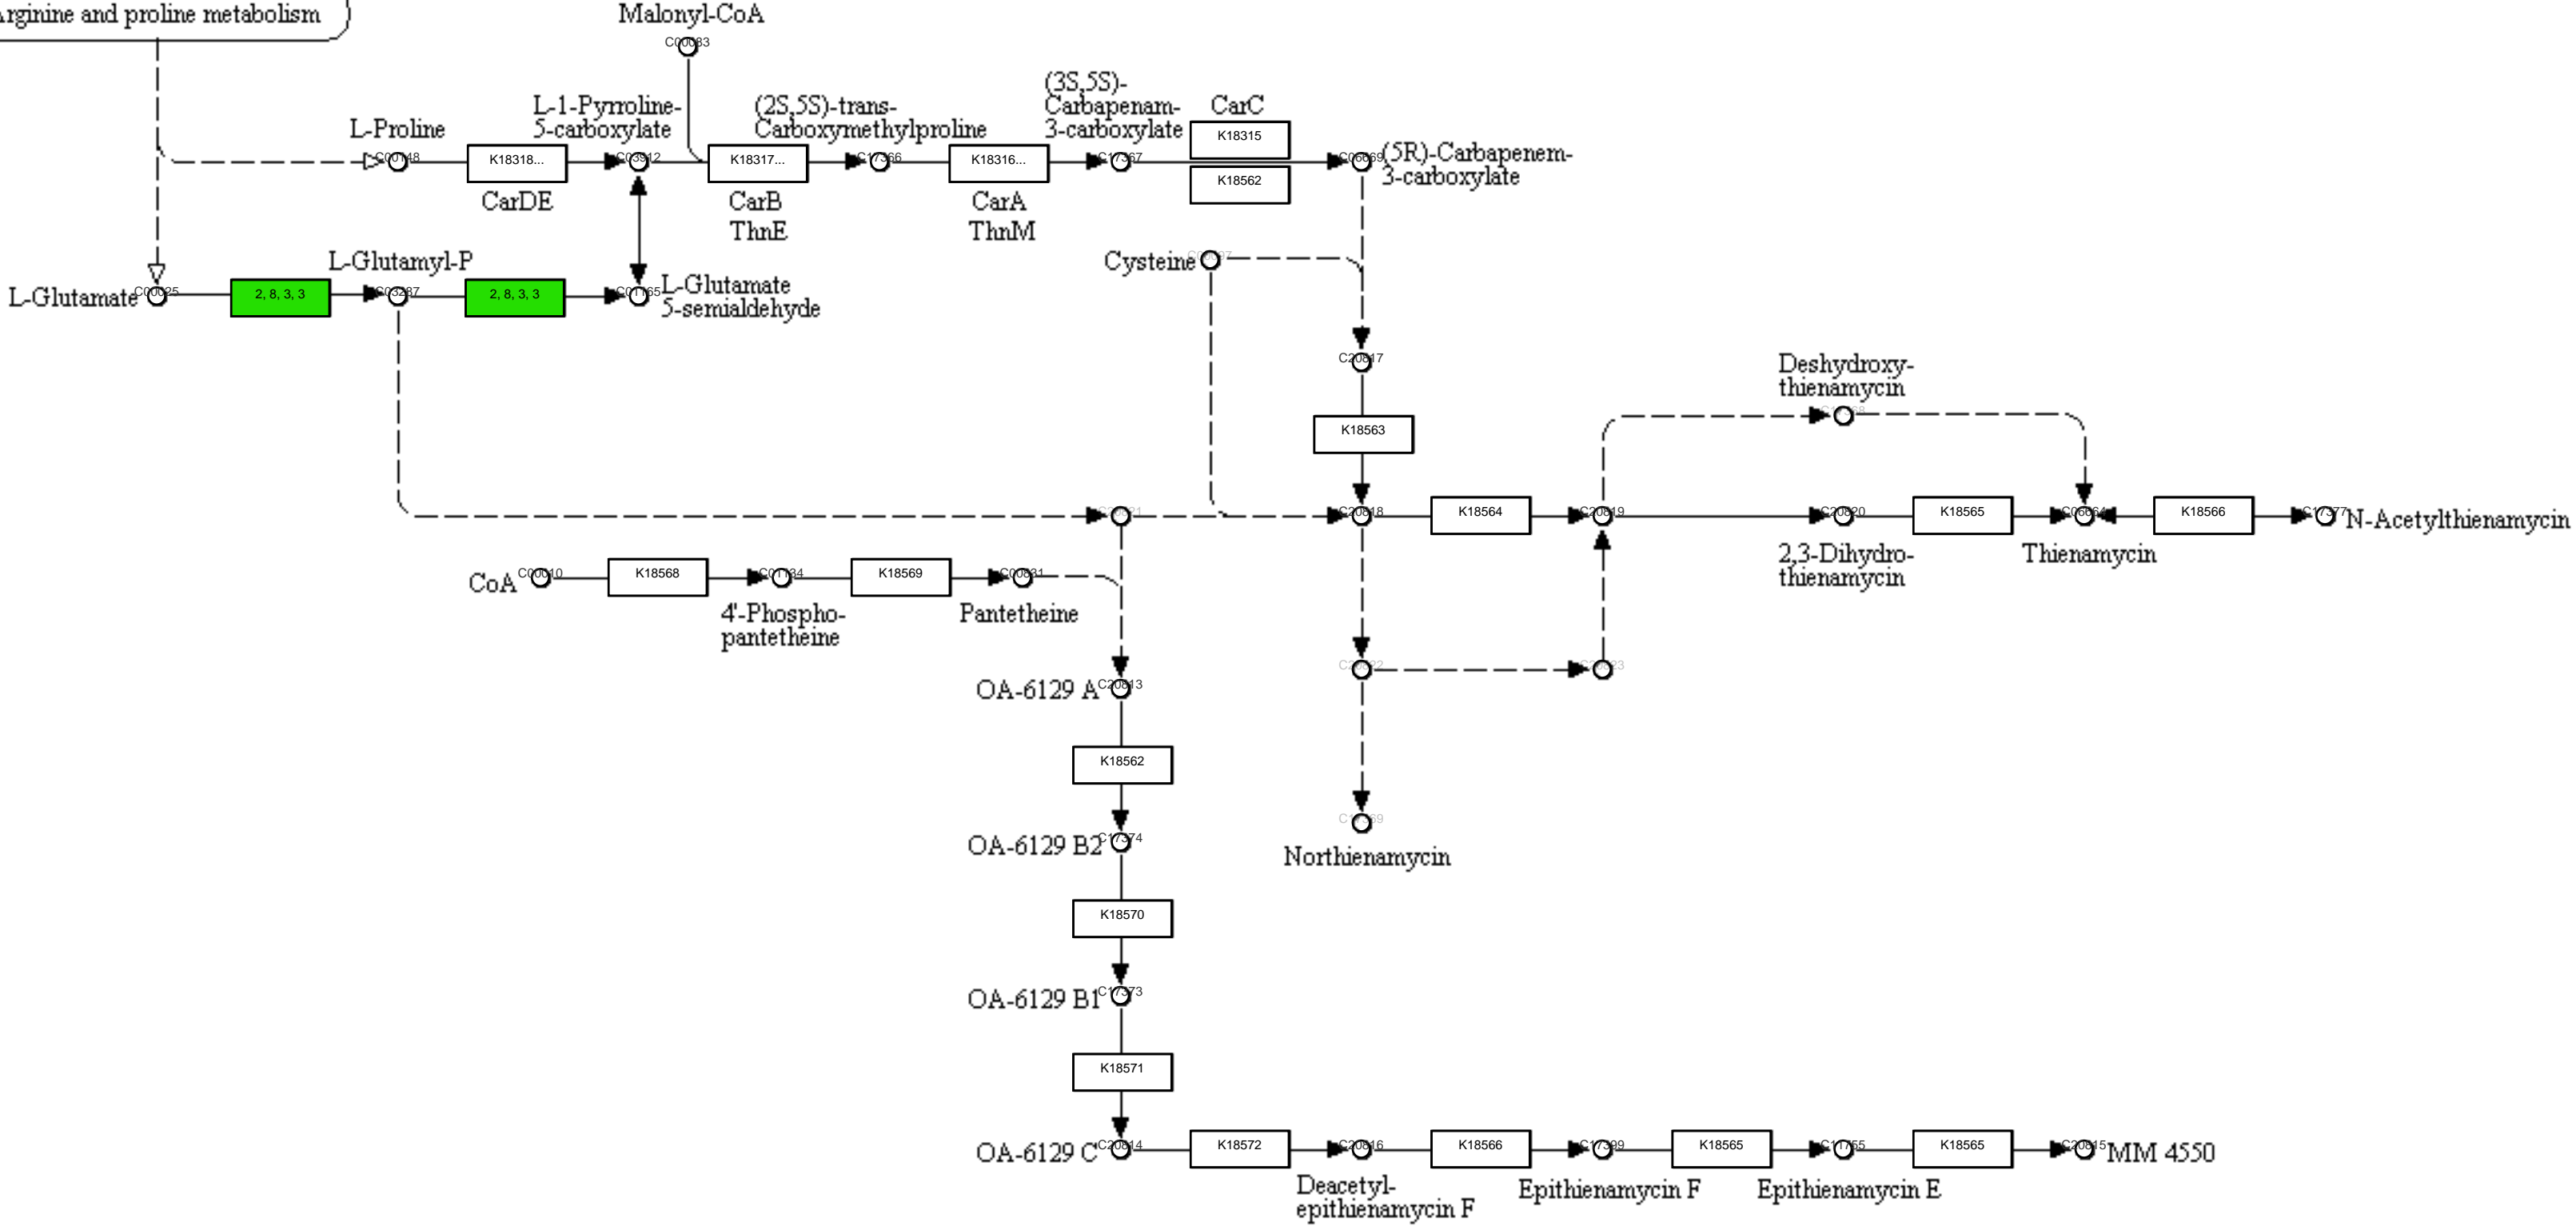

# 11. Xenobiotics biodegradation and metabolism

| MAP        | PATHWAY              |
|------------|----------------------|
| <b>791</b> | Atrazine degradation |

# ATRAZINE DEGRADATION

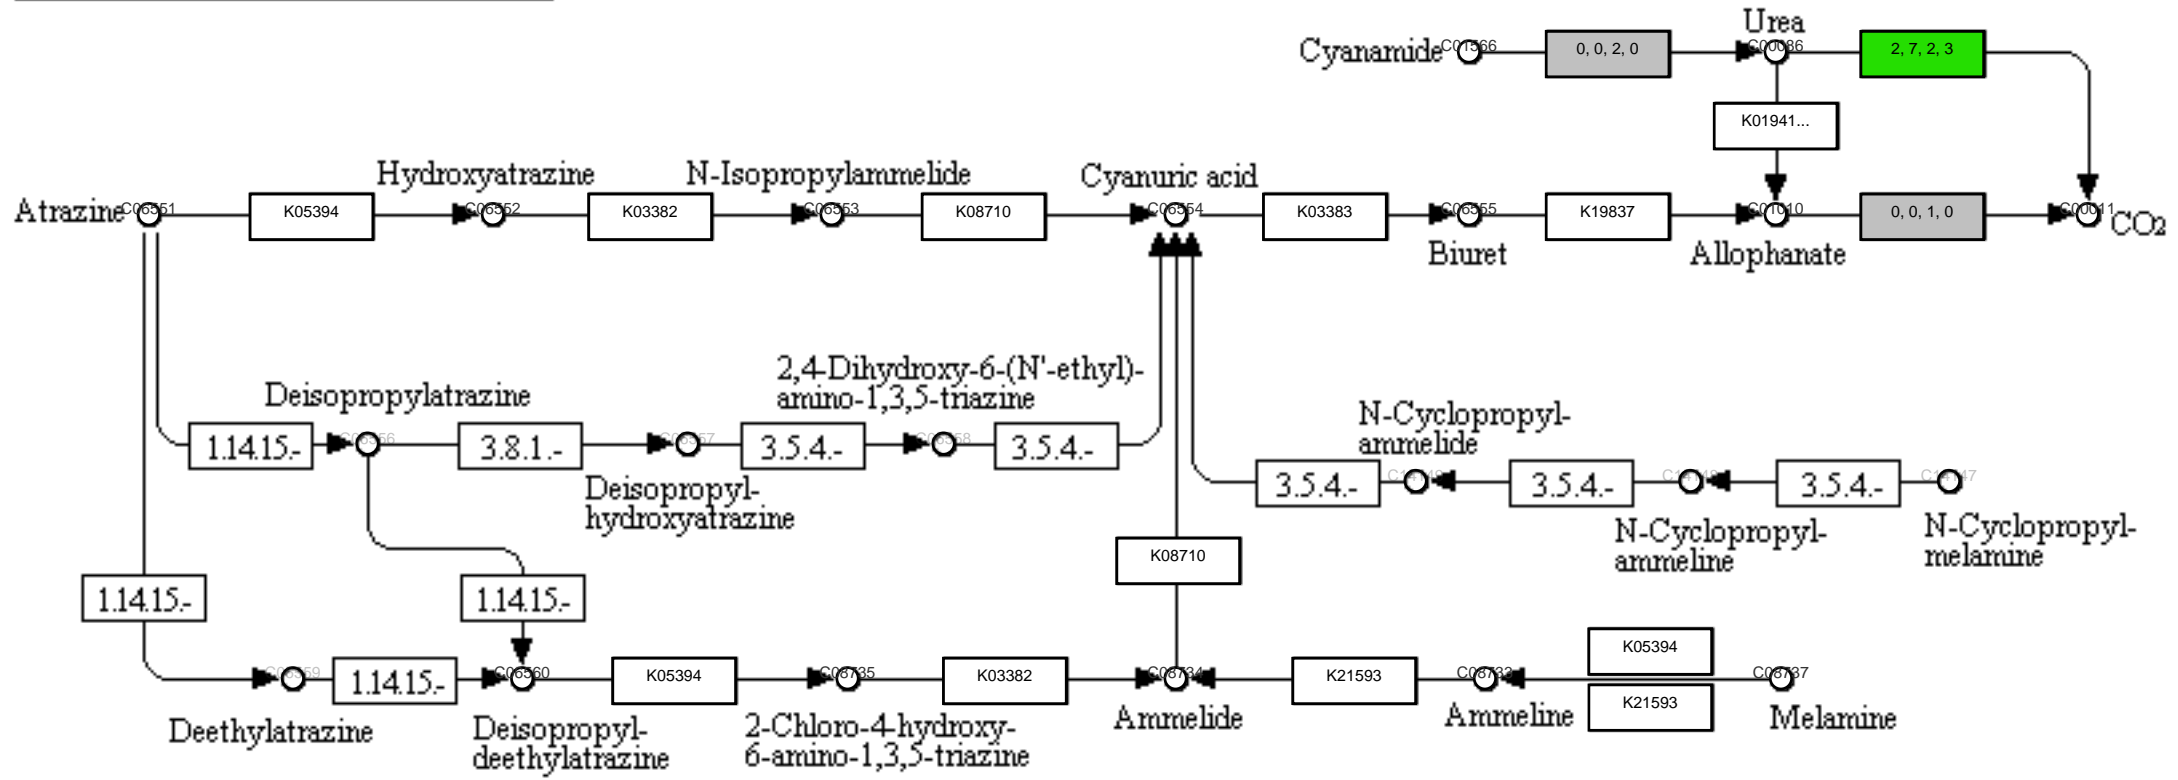

Supplement: 41598_2019_45128_MOESM3_ESM.pdf [file 41598_2019_45128_MOESM3_ESM.pdf]
